# Supplementary material for: A workflow to optimize spatial sampling in ecoacoustic studies
Source: Research Square preprint supplement (doi:10.21203/rs.3.rs-7207339/v2), 2026-01-13

## **Appendix S8: Supporting information for**

**Title:** A workflow to optimize spatial sampling in ecoacoustic studies

**Journal:** Landscape Ecology

**Authors:** Martínez-Arias, V. M.<sup>1,3</sup>; Paniagua-Villada<sup>1,3</sup>, C.; Guerrero, M.J.; Daza, J. M.<sup>1</sup>

**Author affiliations at the time the work was conducted:**

1 Grupo Herpetológico de Antioquia GHA, Instituto de Biología, Facultad de Ciencias Exactas y Naturales, Universidad de Antioquia UdeA, Calle 70 No. 52 - 21, Medellín, Colombia.

2 SISTEMIC, Facultad de Ingeniería, Universidad de Antioquia UdeA, Medellín, Colombia

3 Corporación Merceditas, Calle 3 29A-11, casa 110, Medellín, Colombia

**\*Corresponding author:** Victor M. Martínez Arias

Email: [vmanuel.martinez@udea.edu.co](mailto:vmanuel.martinez@udea.edu.co)

**SUPPLEMENTARY INFORMATION S8: Distributional comparison of landscape heterogeneity across stratified sub sampling strategies.**

Kernel density estimates (Density plot B) and quantile-quantile plots (Q-Q plot A) illustrate how the mean landscape proxy values (L\_proxy\_mean) from each subsample compare with the full sampling grid across different strategies (Basins, Halfbasins, Landcover, SLIC) and localities (Andean Rural, Andean Urban, Plains). Sub samples were grouped by point selection origin: poles of inaccessibility or directly examined locations. Statistical differences in distributions were assessed using Kolmogorov-Smirnov tests and Wasserstein distances.

A Q-Q Plot

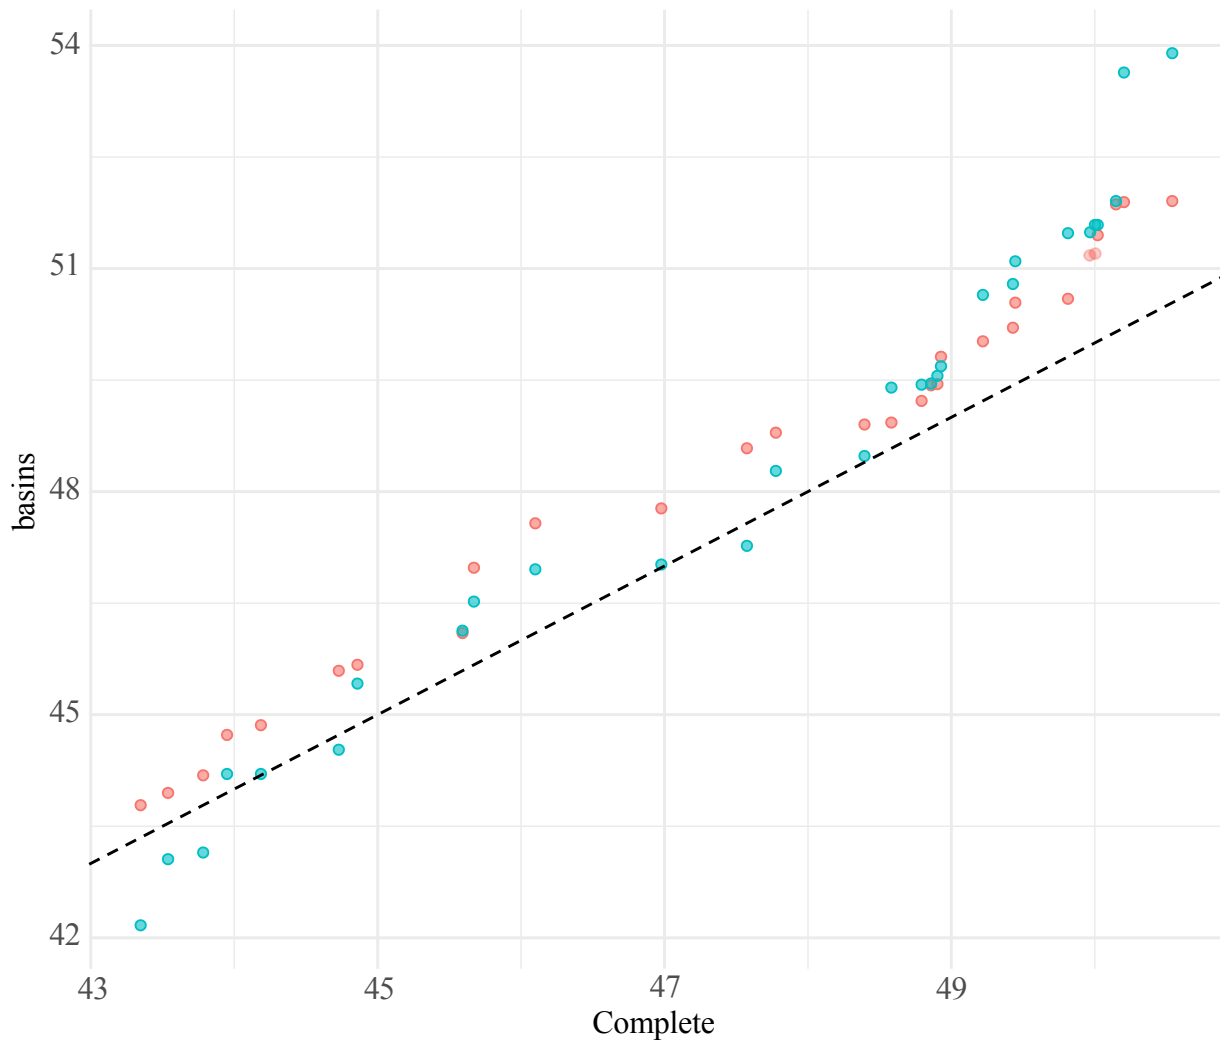

B Density plot

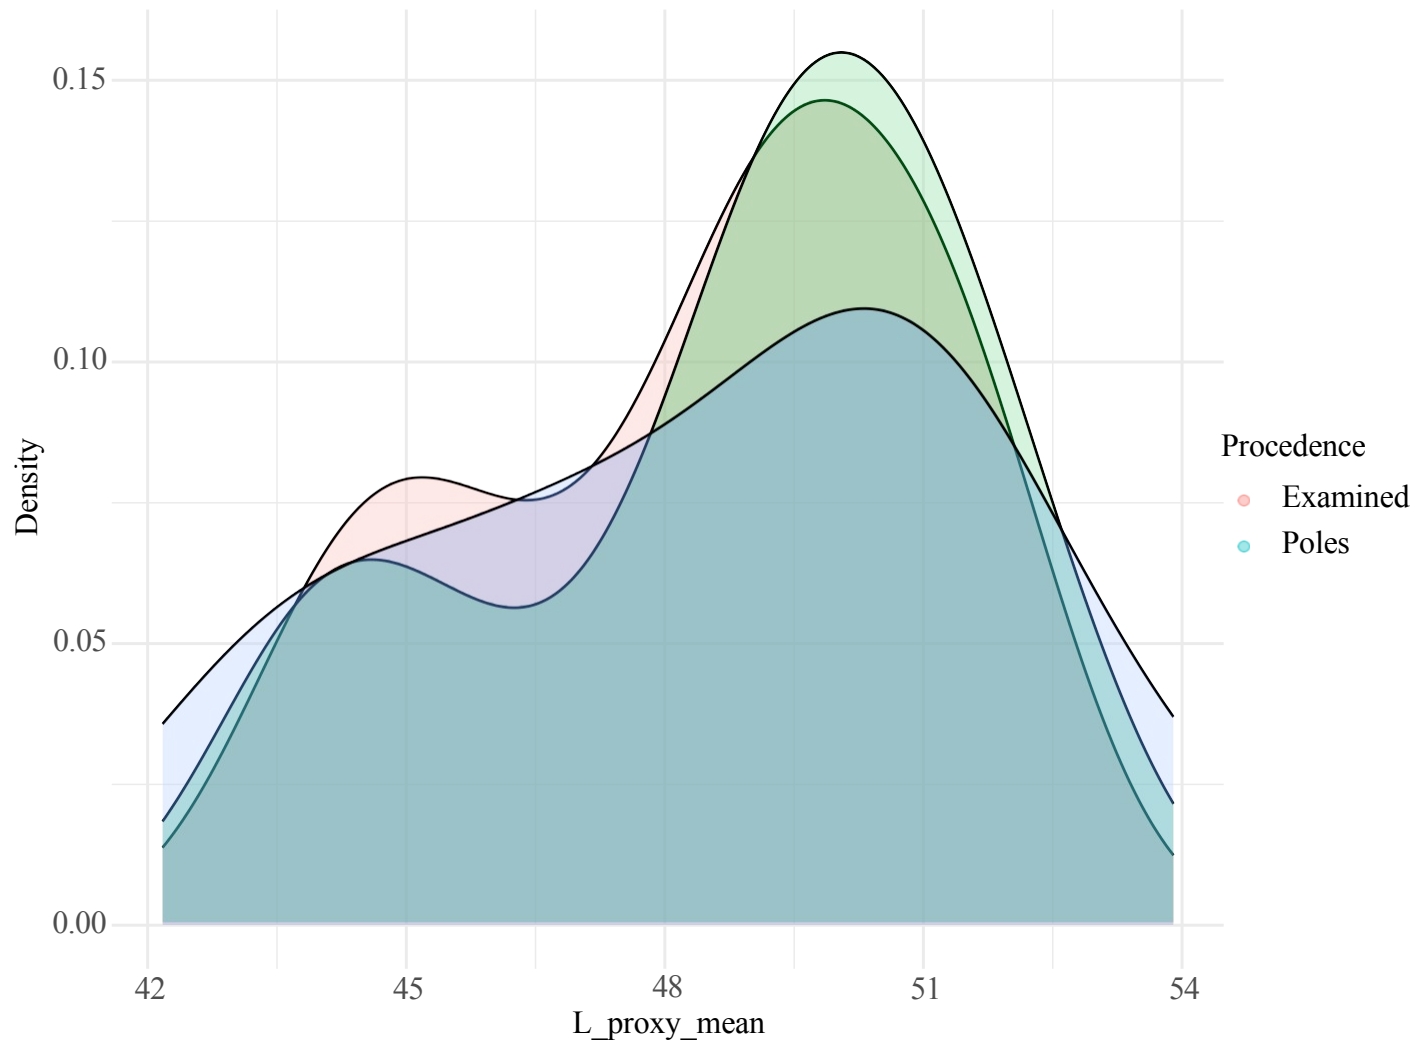

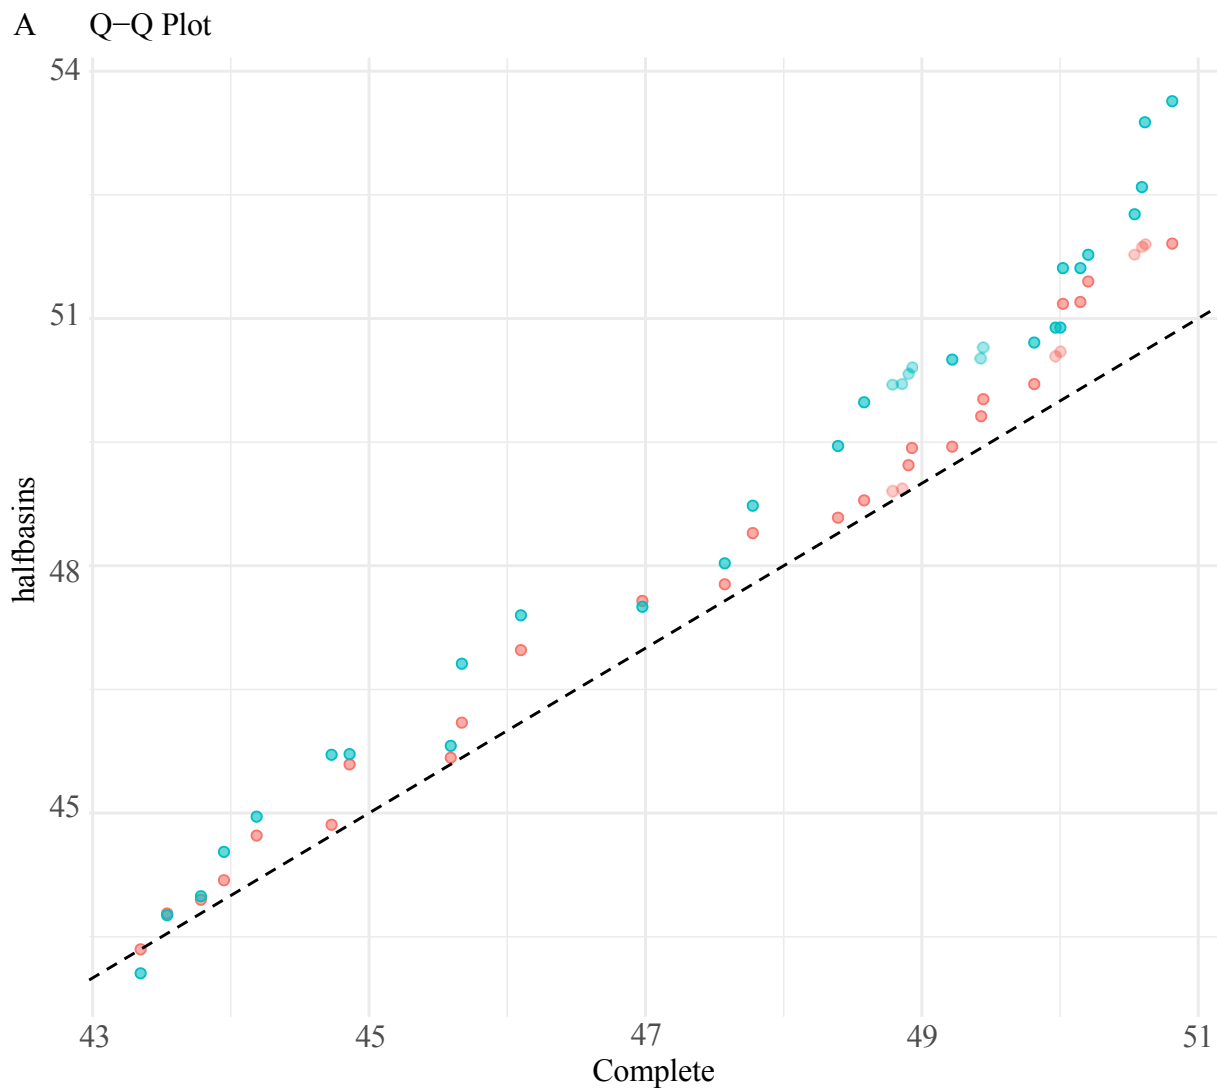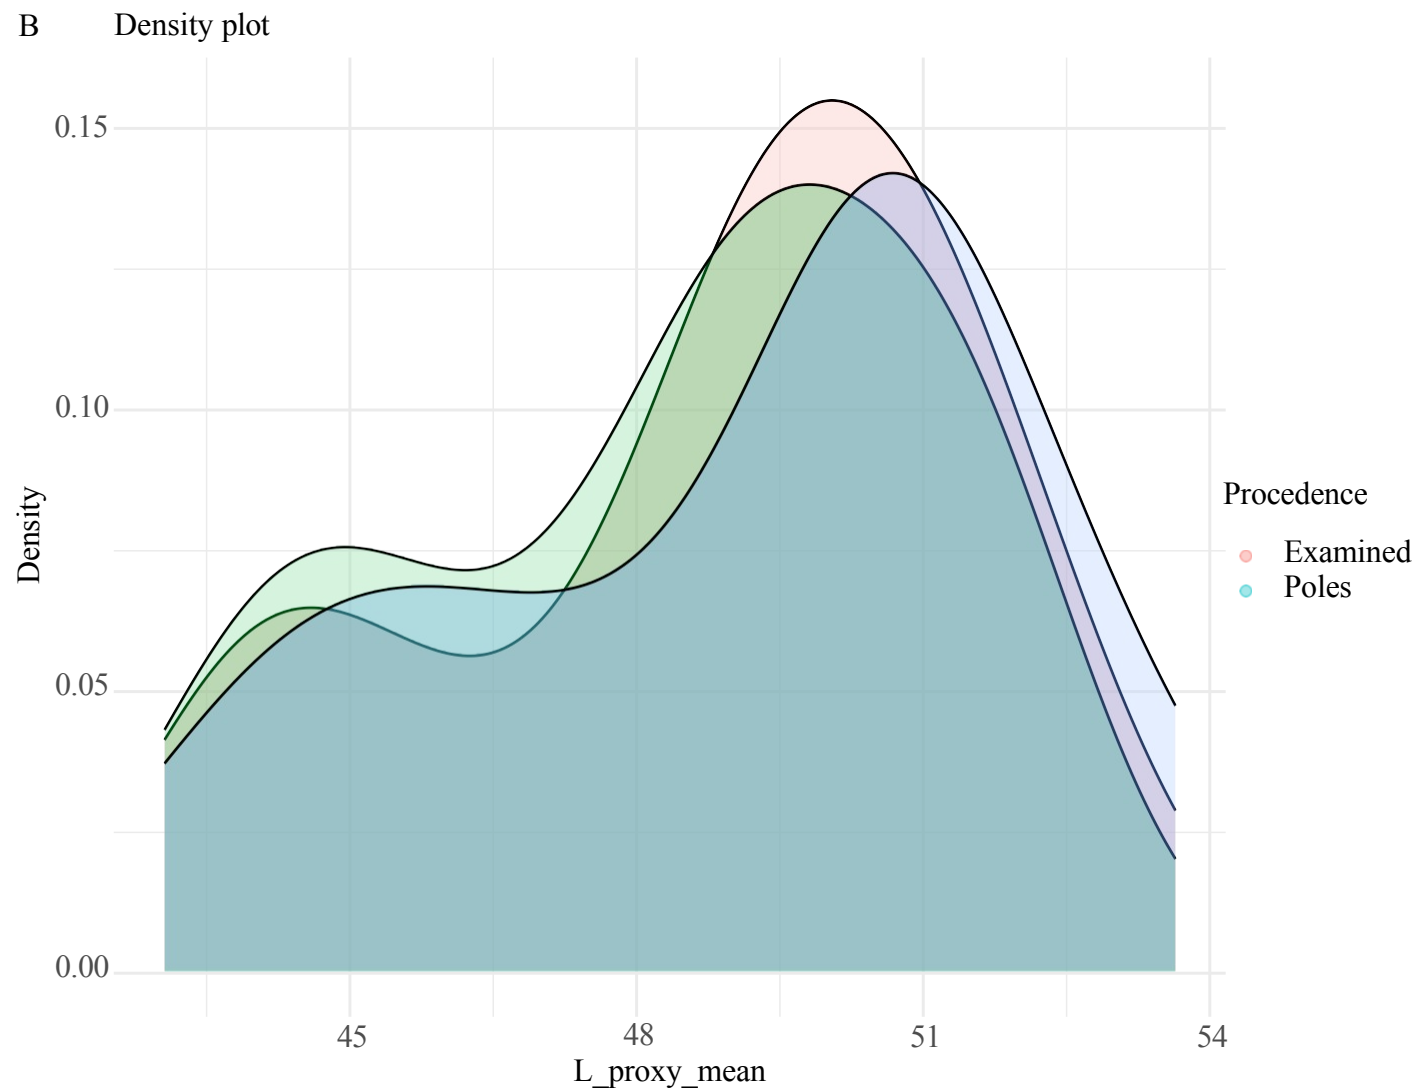

A Q-Q Plot

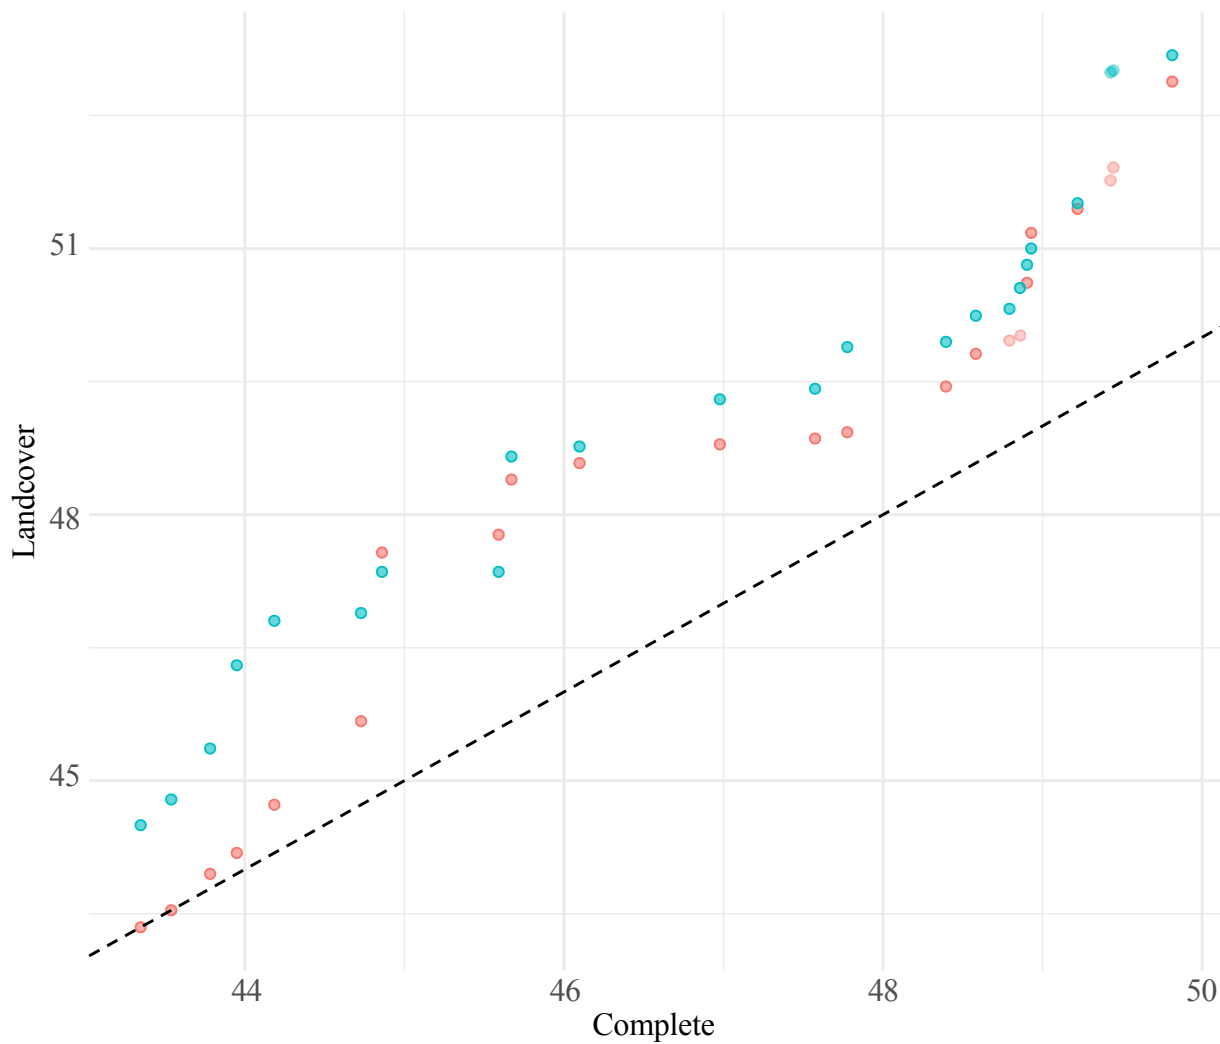

B Density plot

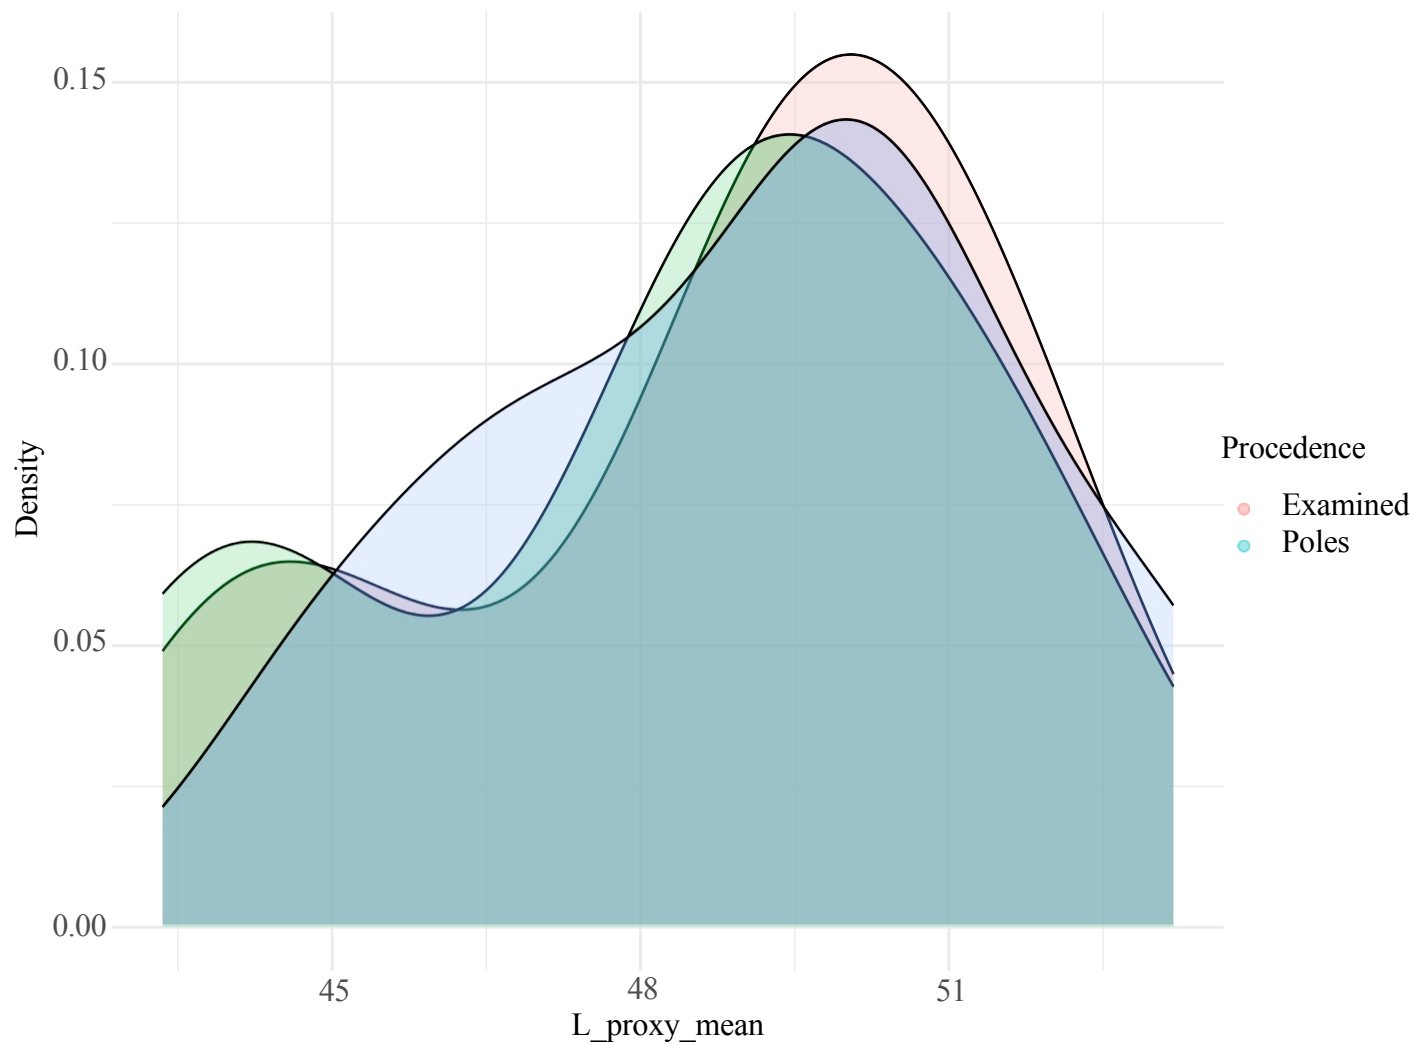

A

Q-Q Plot

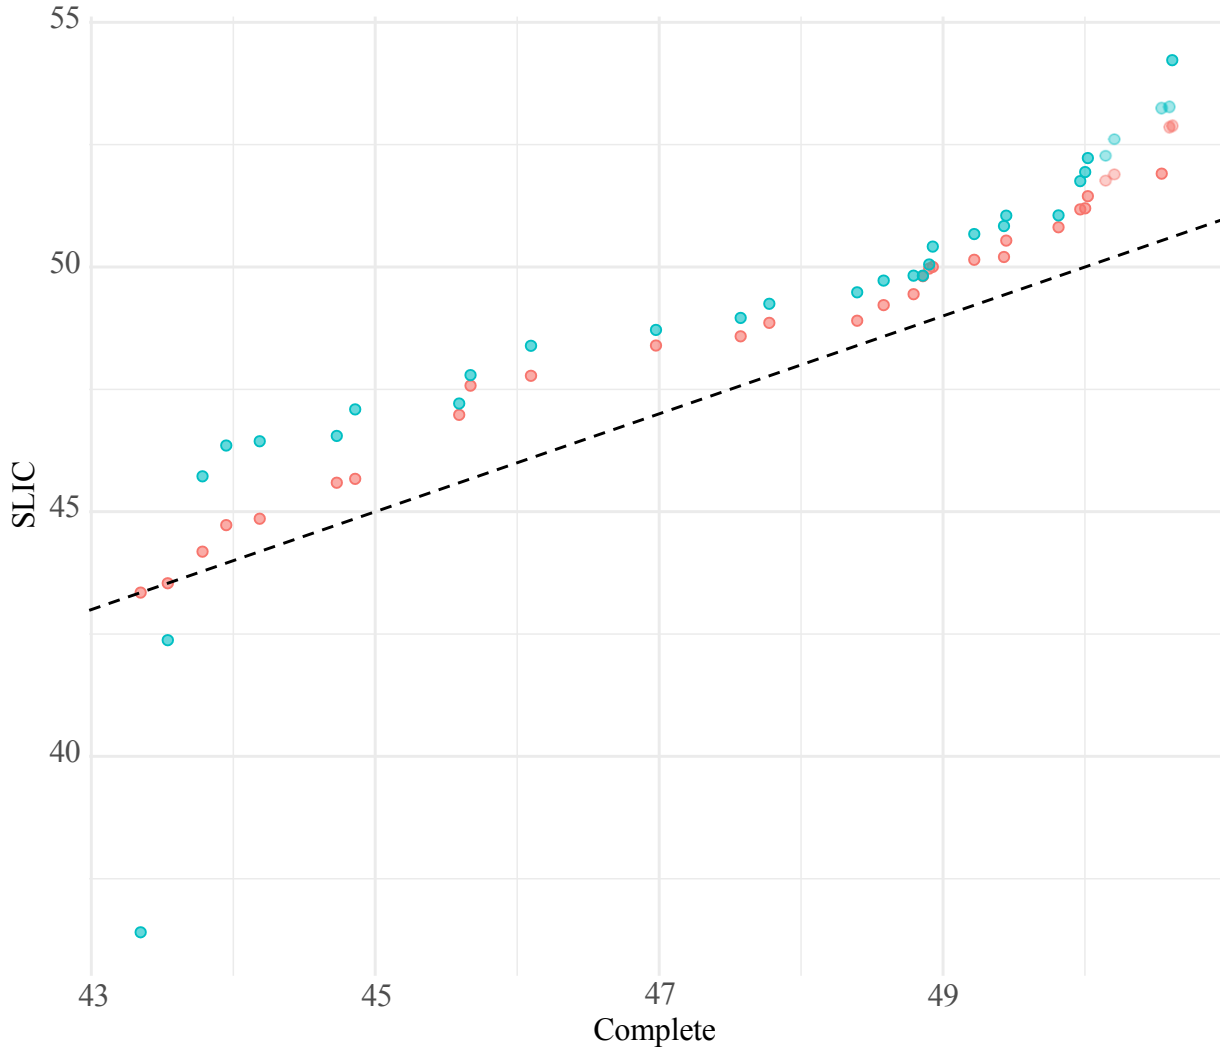

B

Density plot

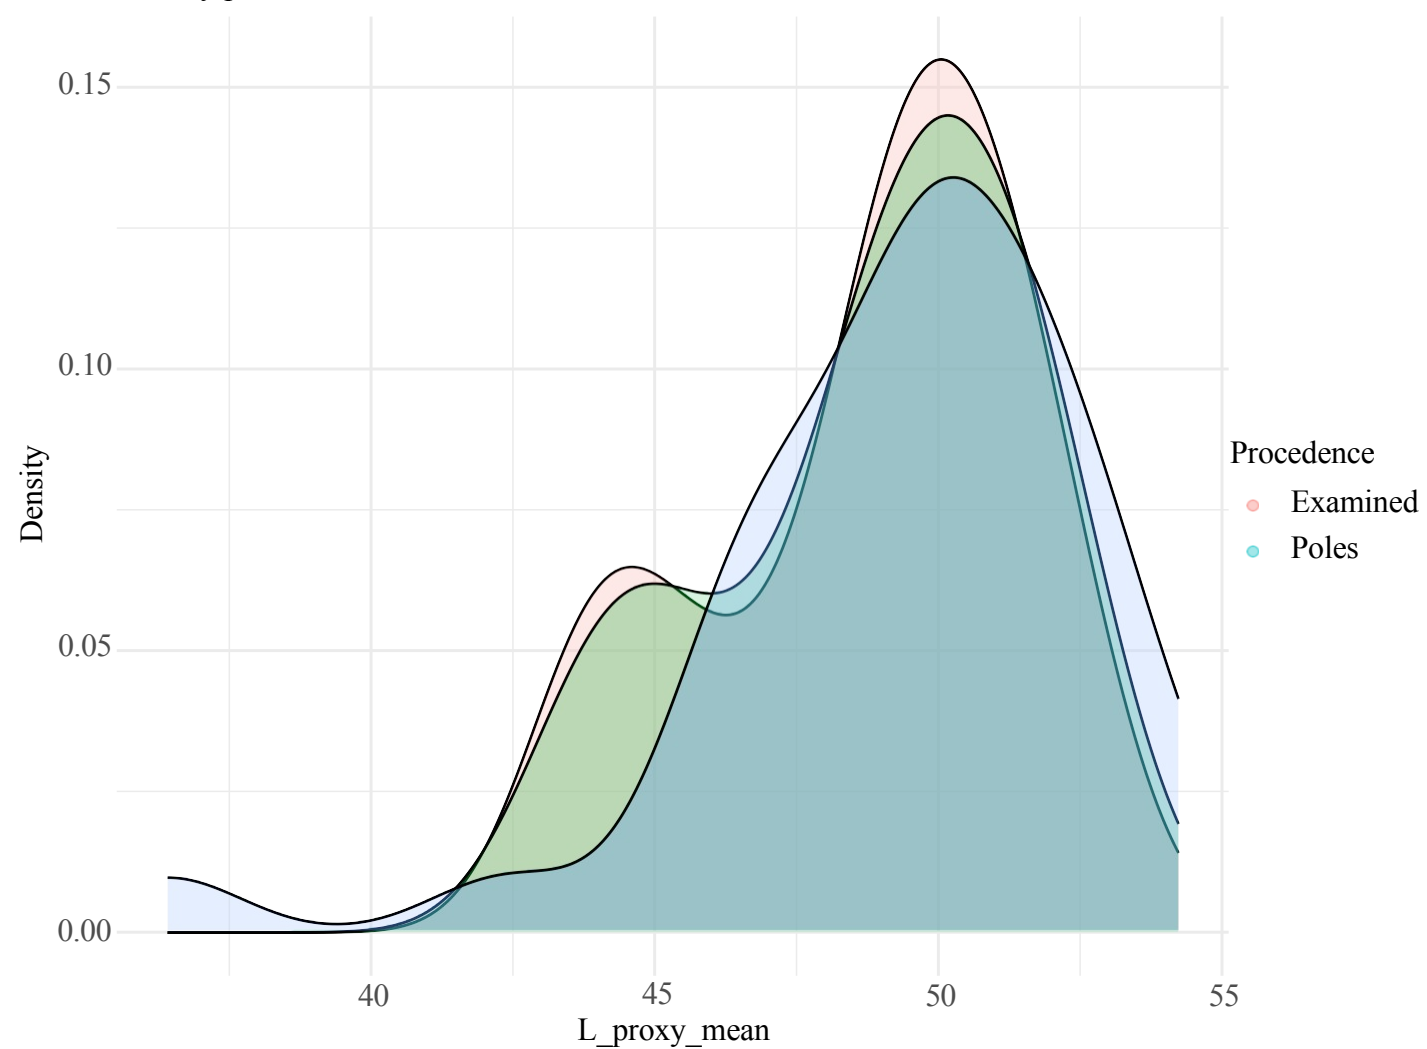

A Q-Q Plot

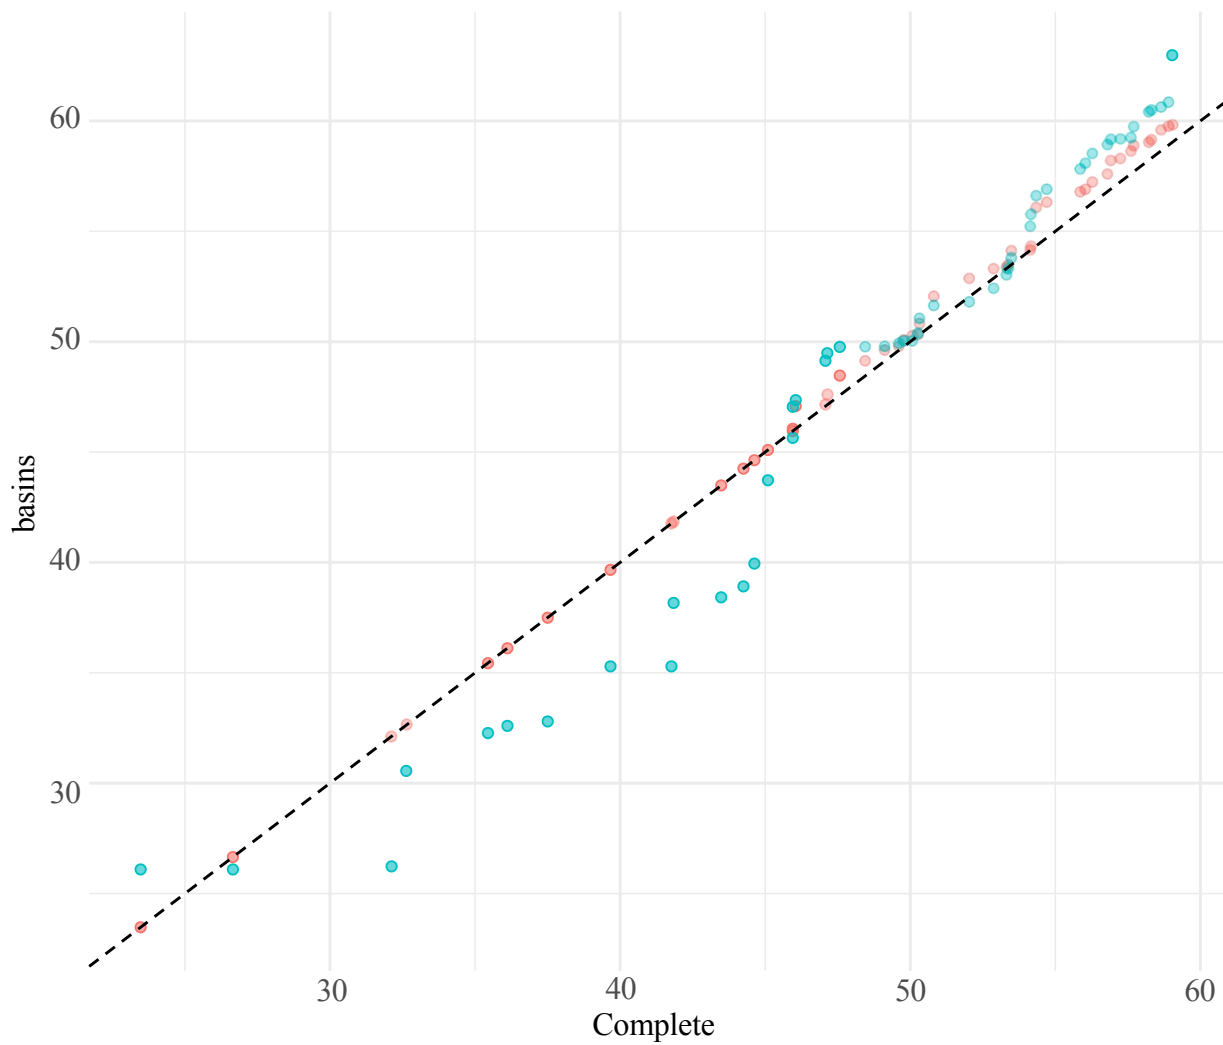

B Density plot

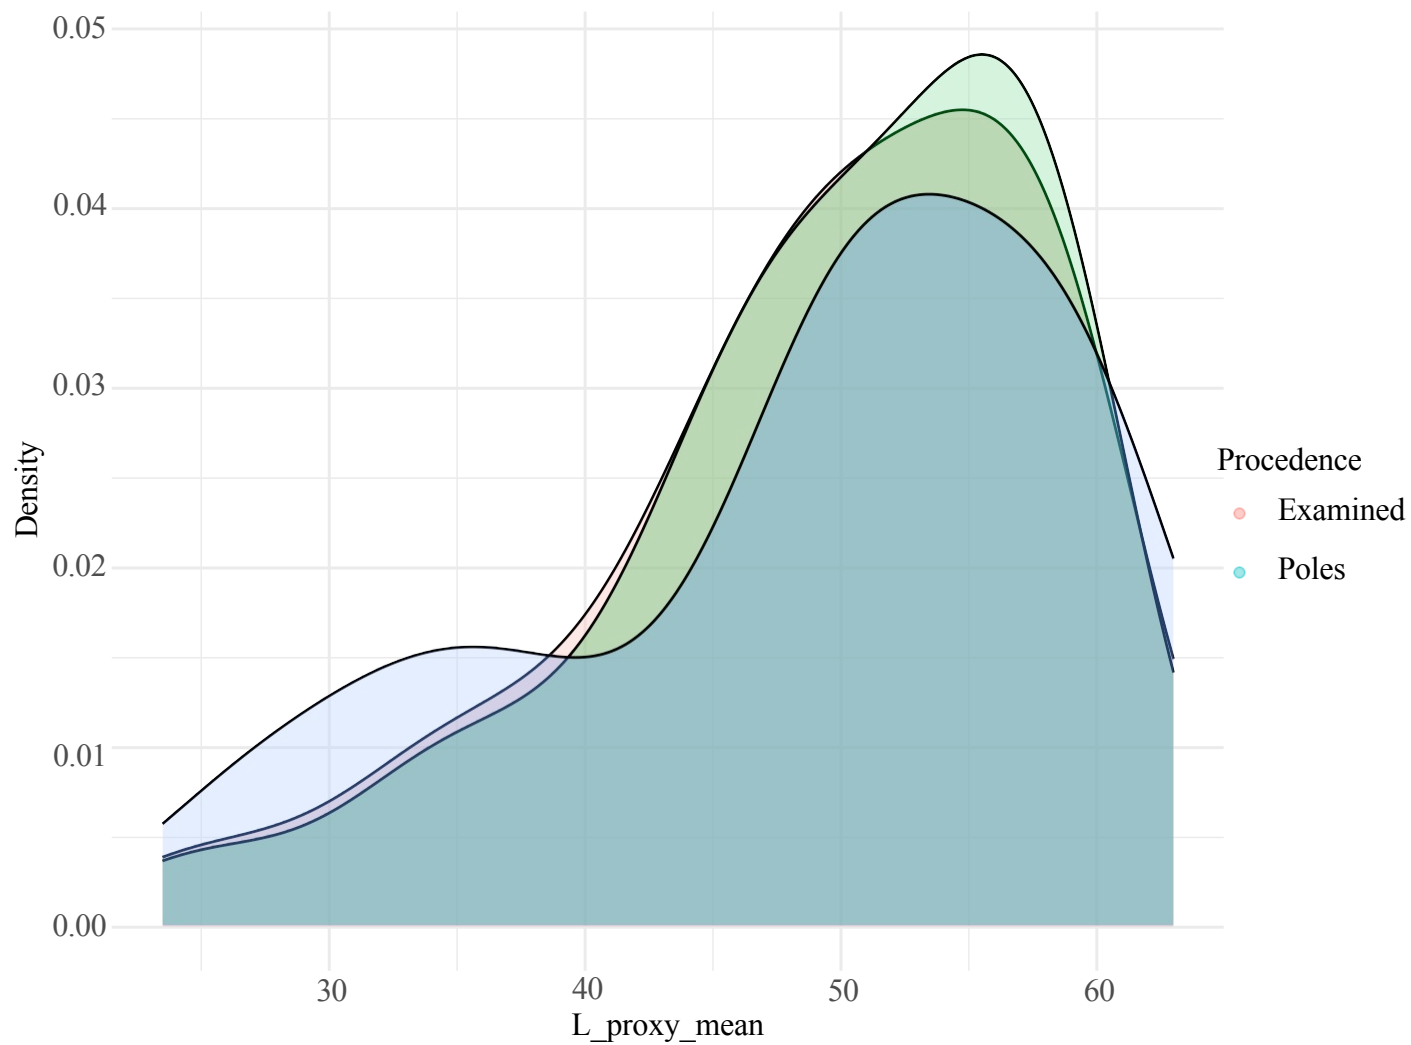

A Q-Q Plot

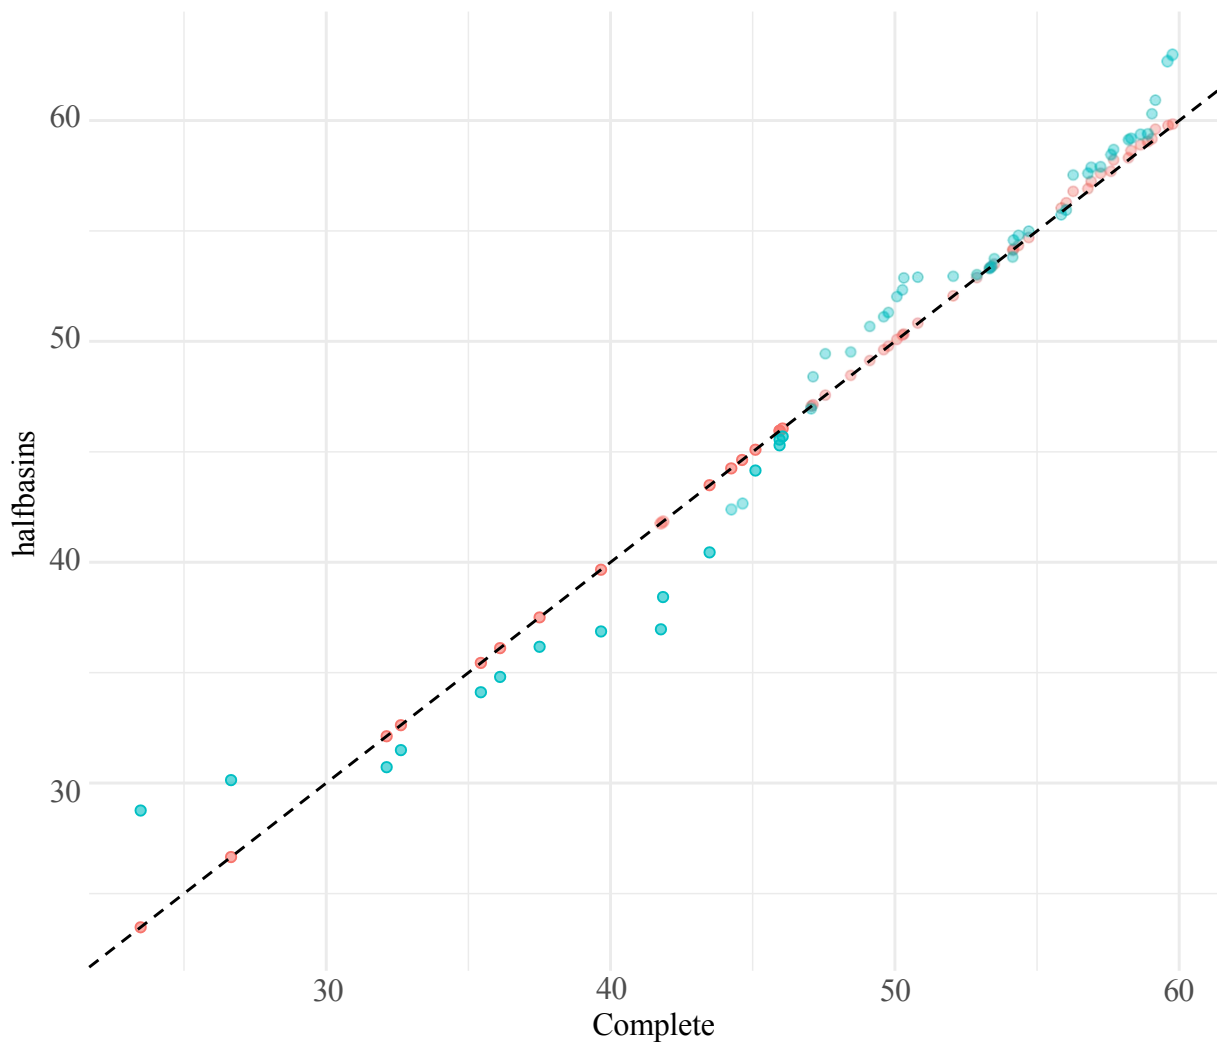

B Density plot

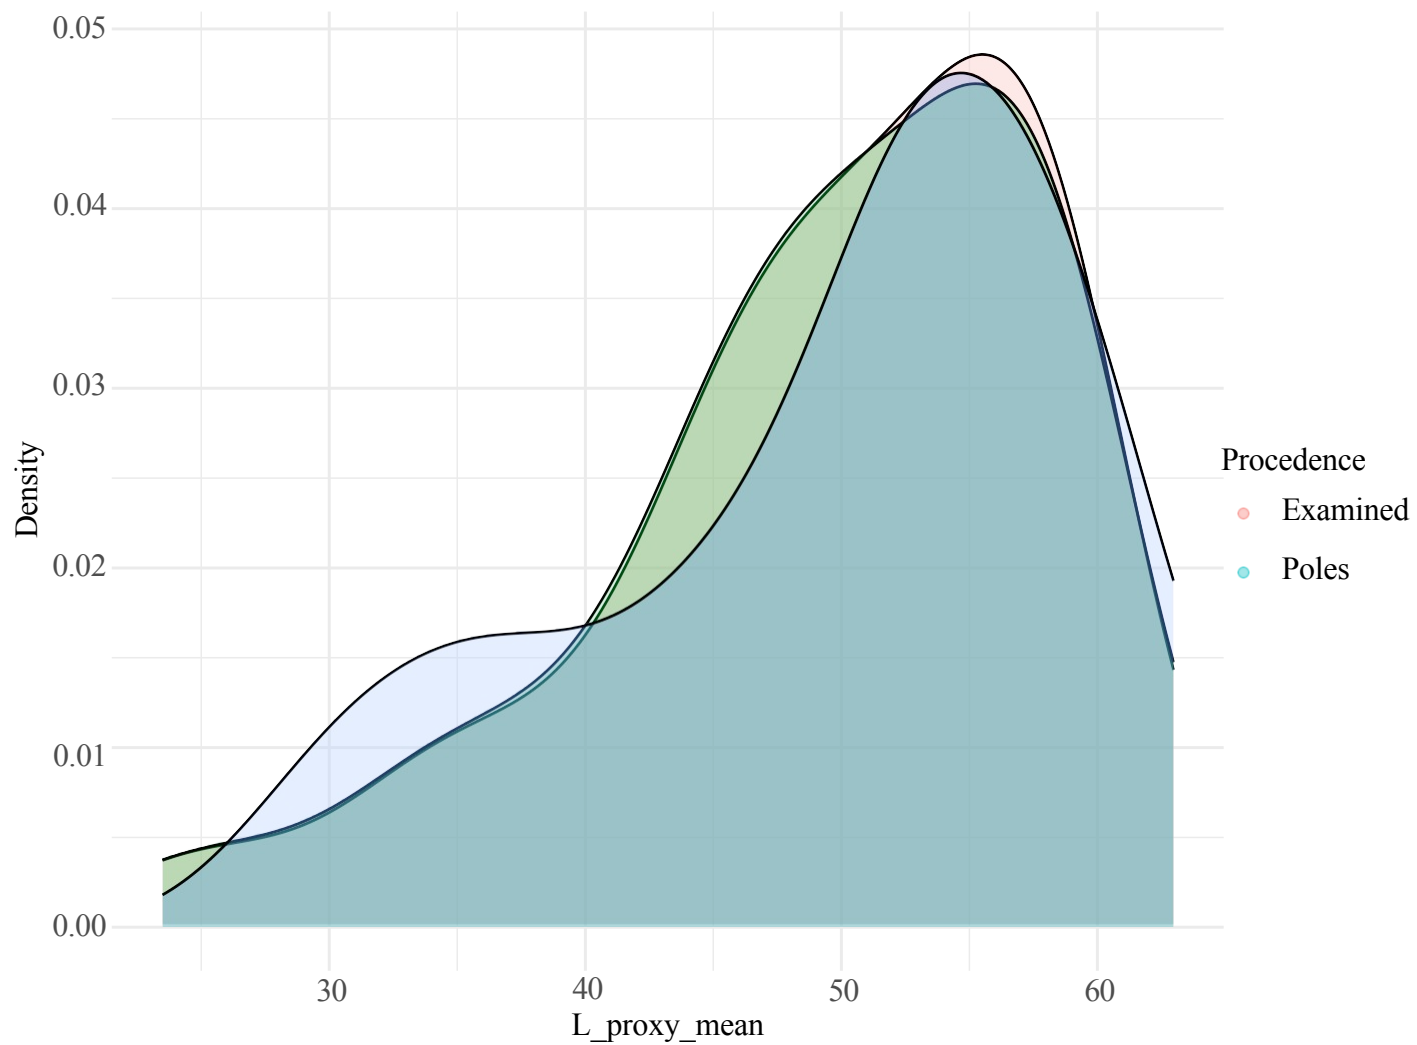



# AndeanUrban / Landcover / Comparison with Examined & Poles

A Q-Q Plot

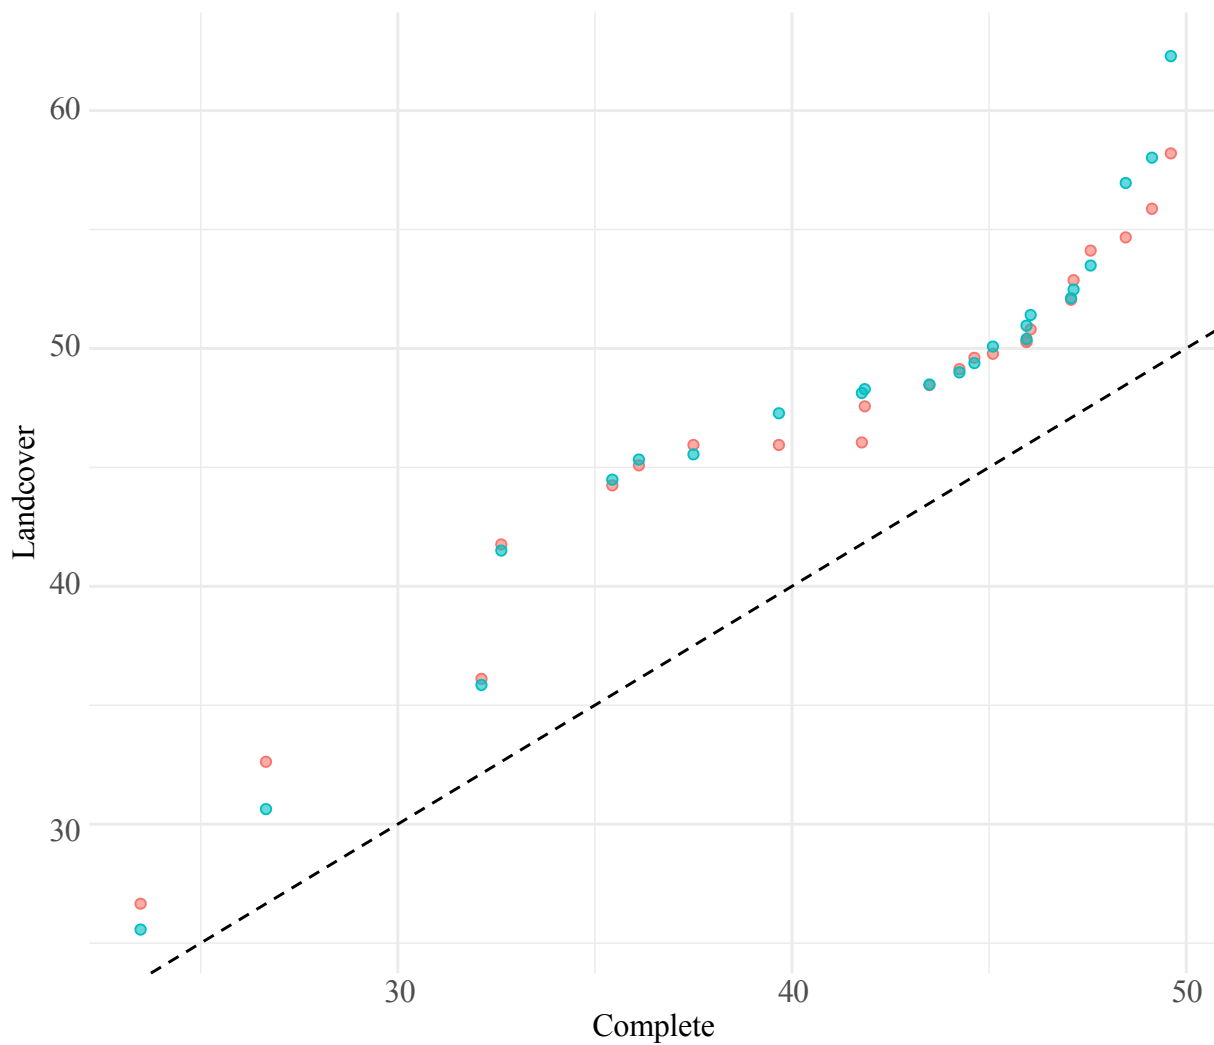

B Density plot

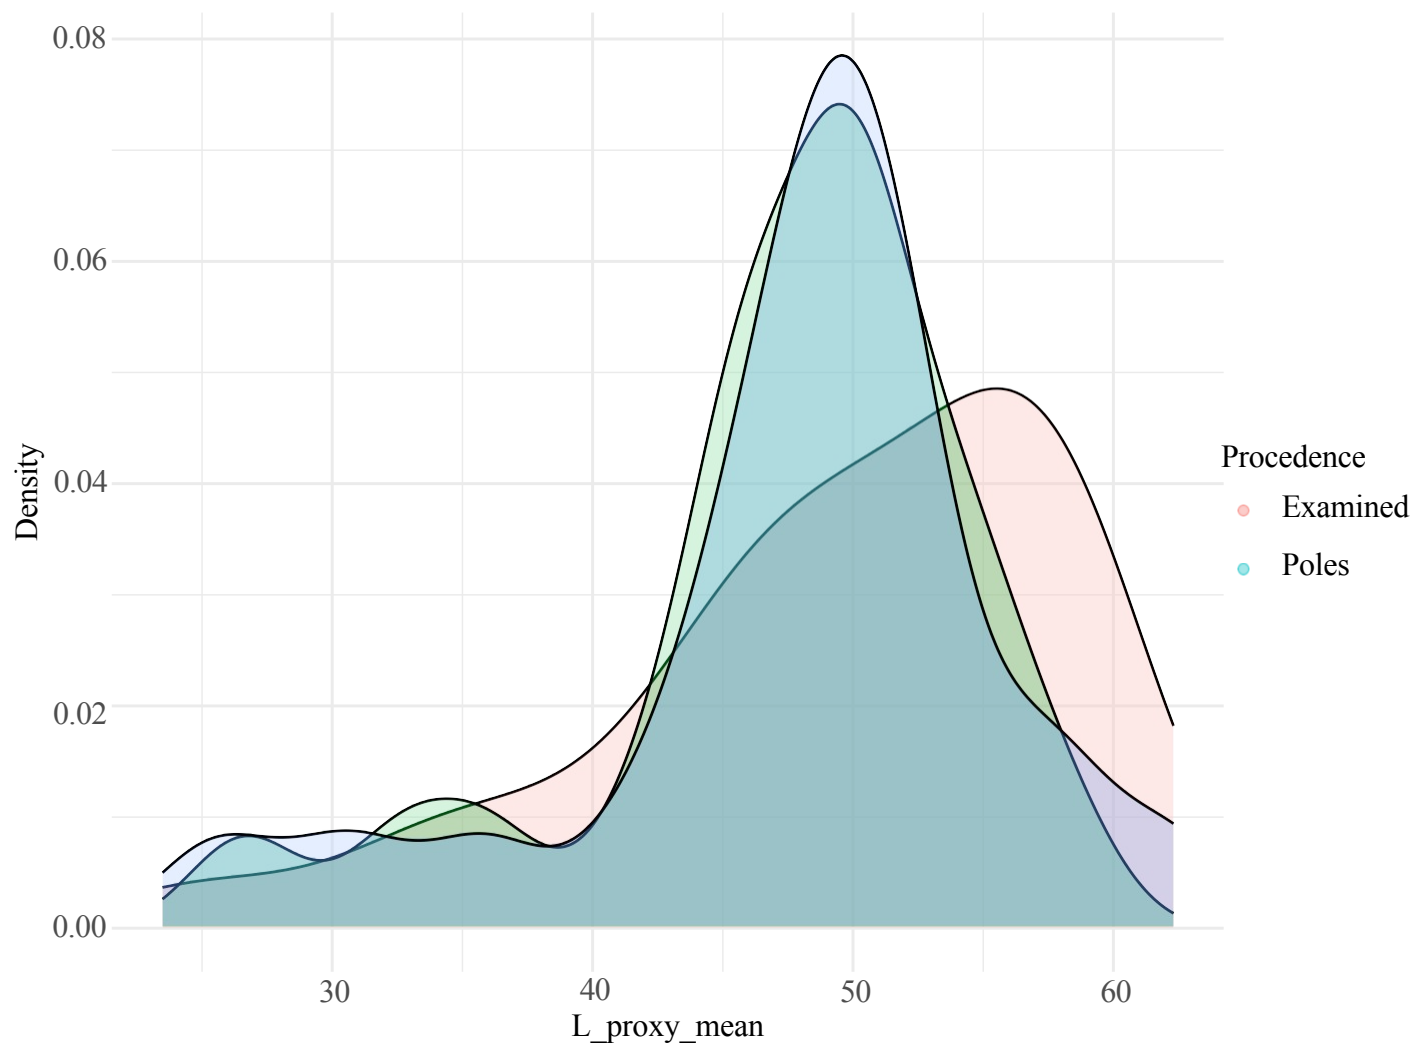

# AndeanUrban / SLIC / Comparison with Examined & Poles

A Q-Q Plot

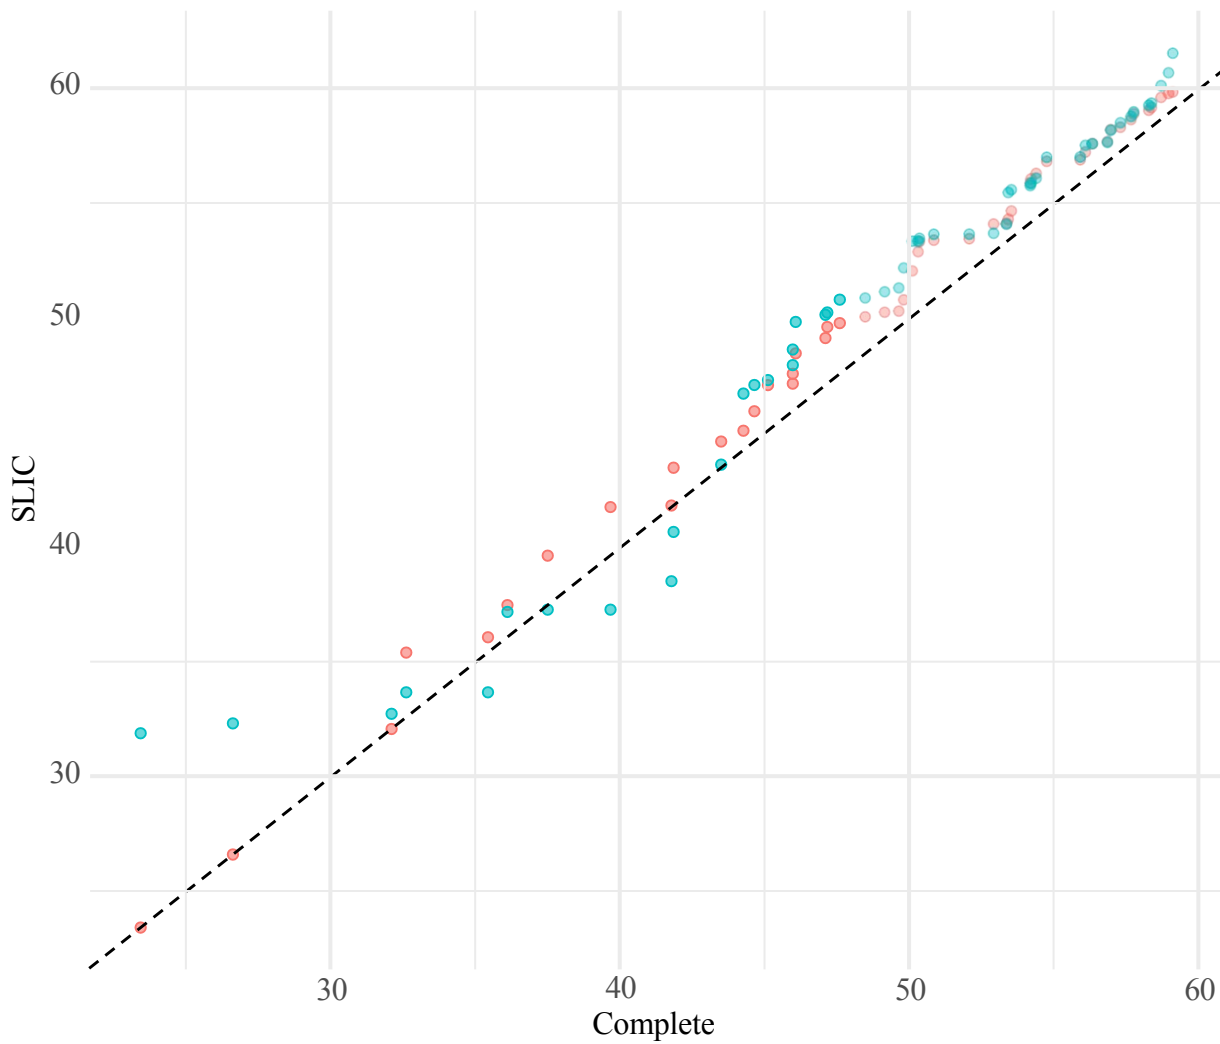

B Density plot

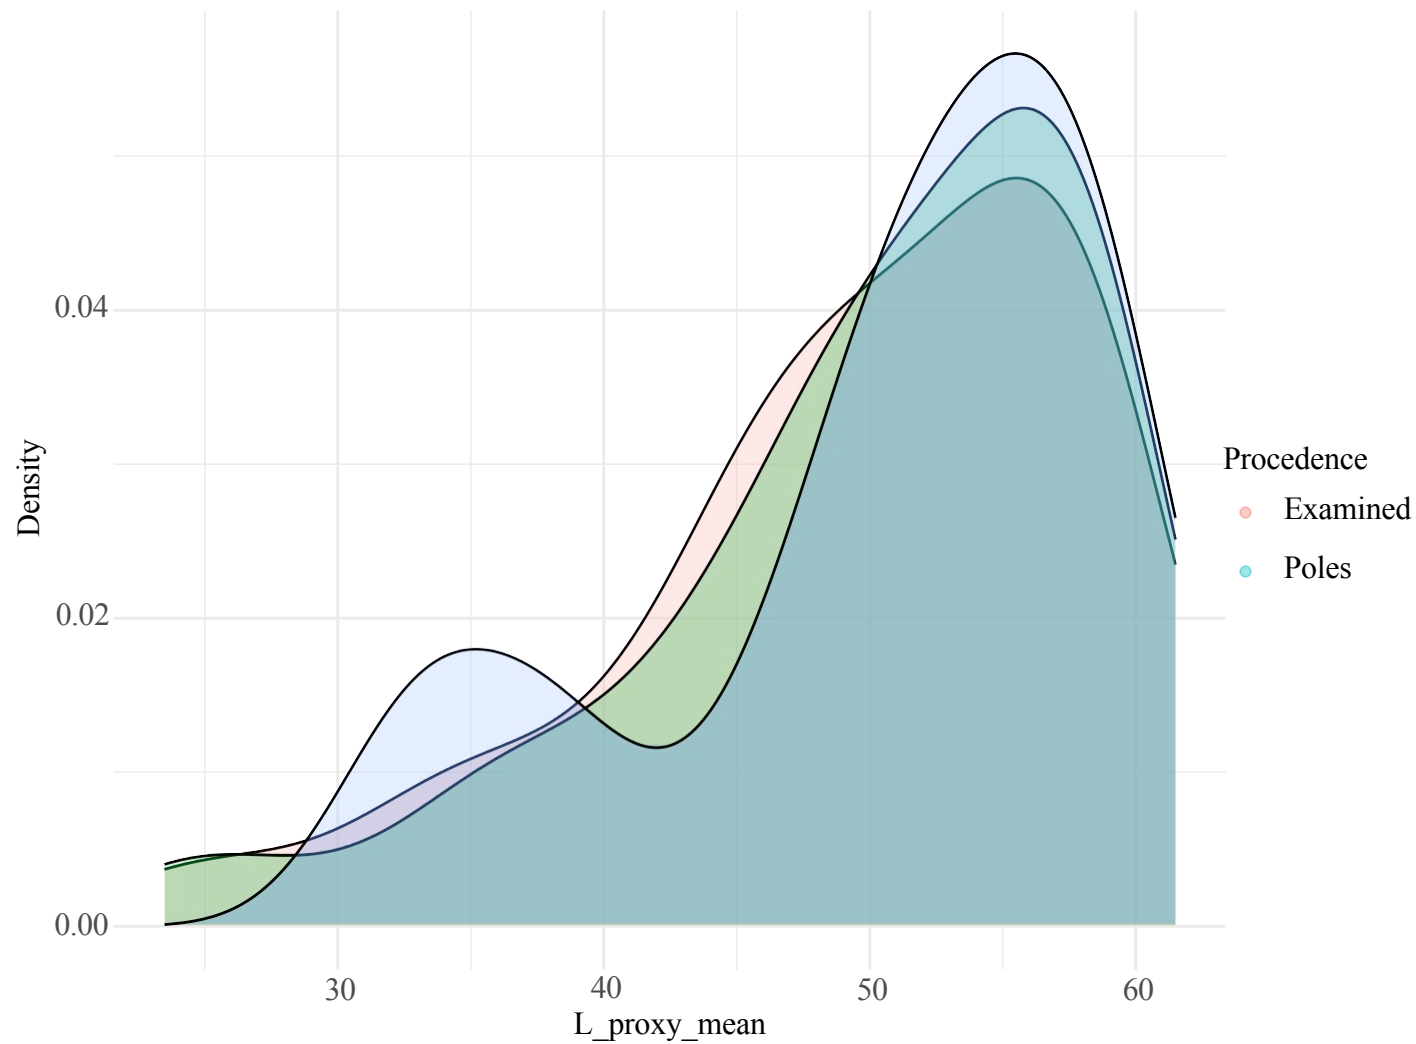

# Plains / basins / Comparison with Examined & Poles

A Q-Q Plot

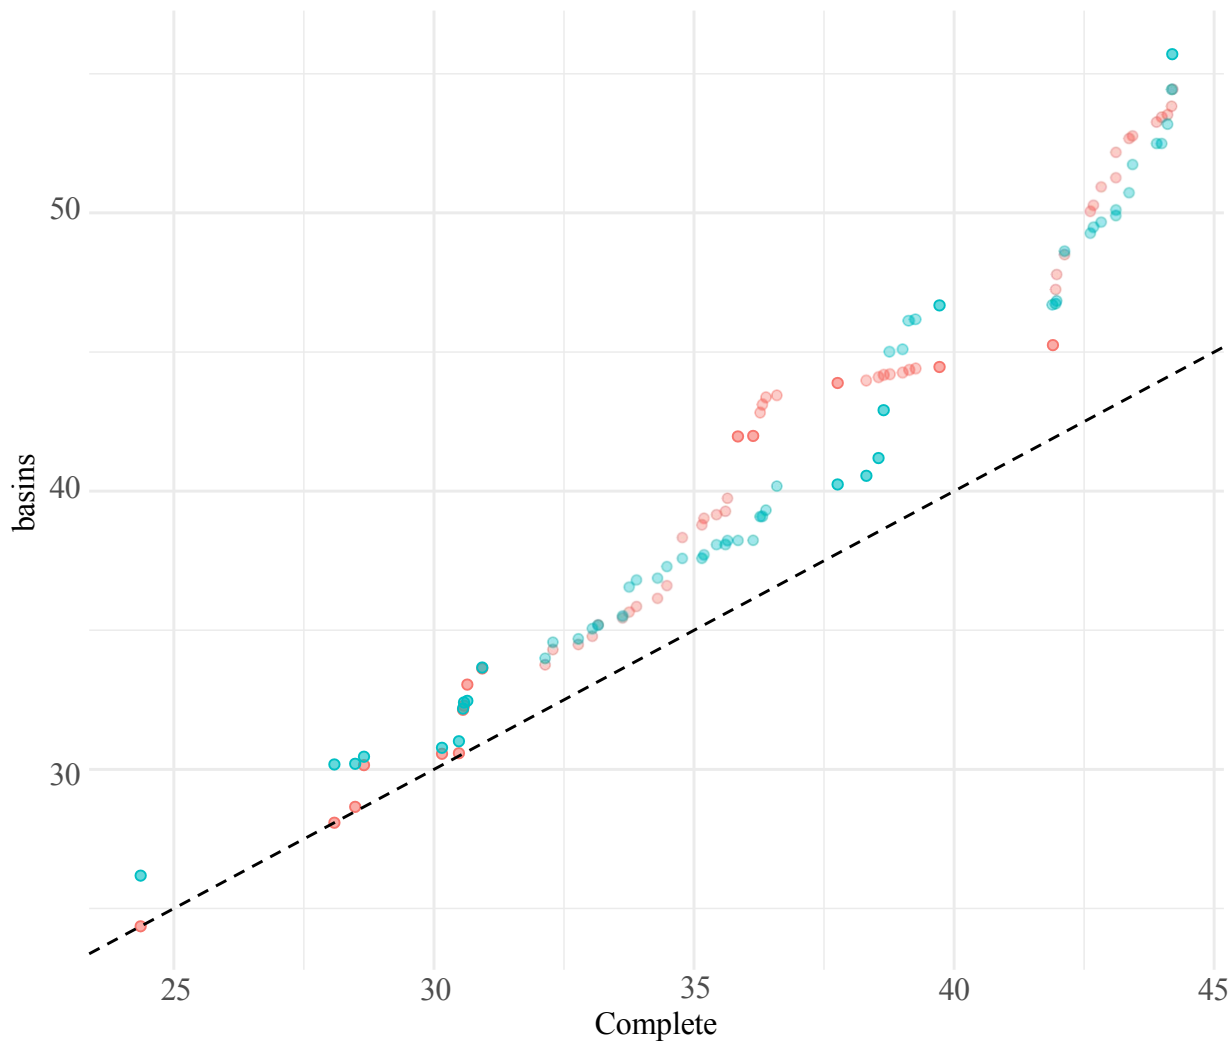

B Density plot

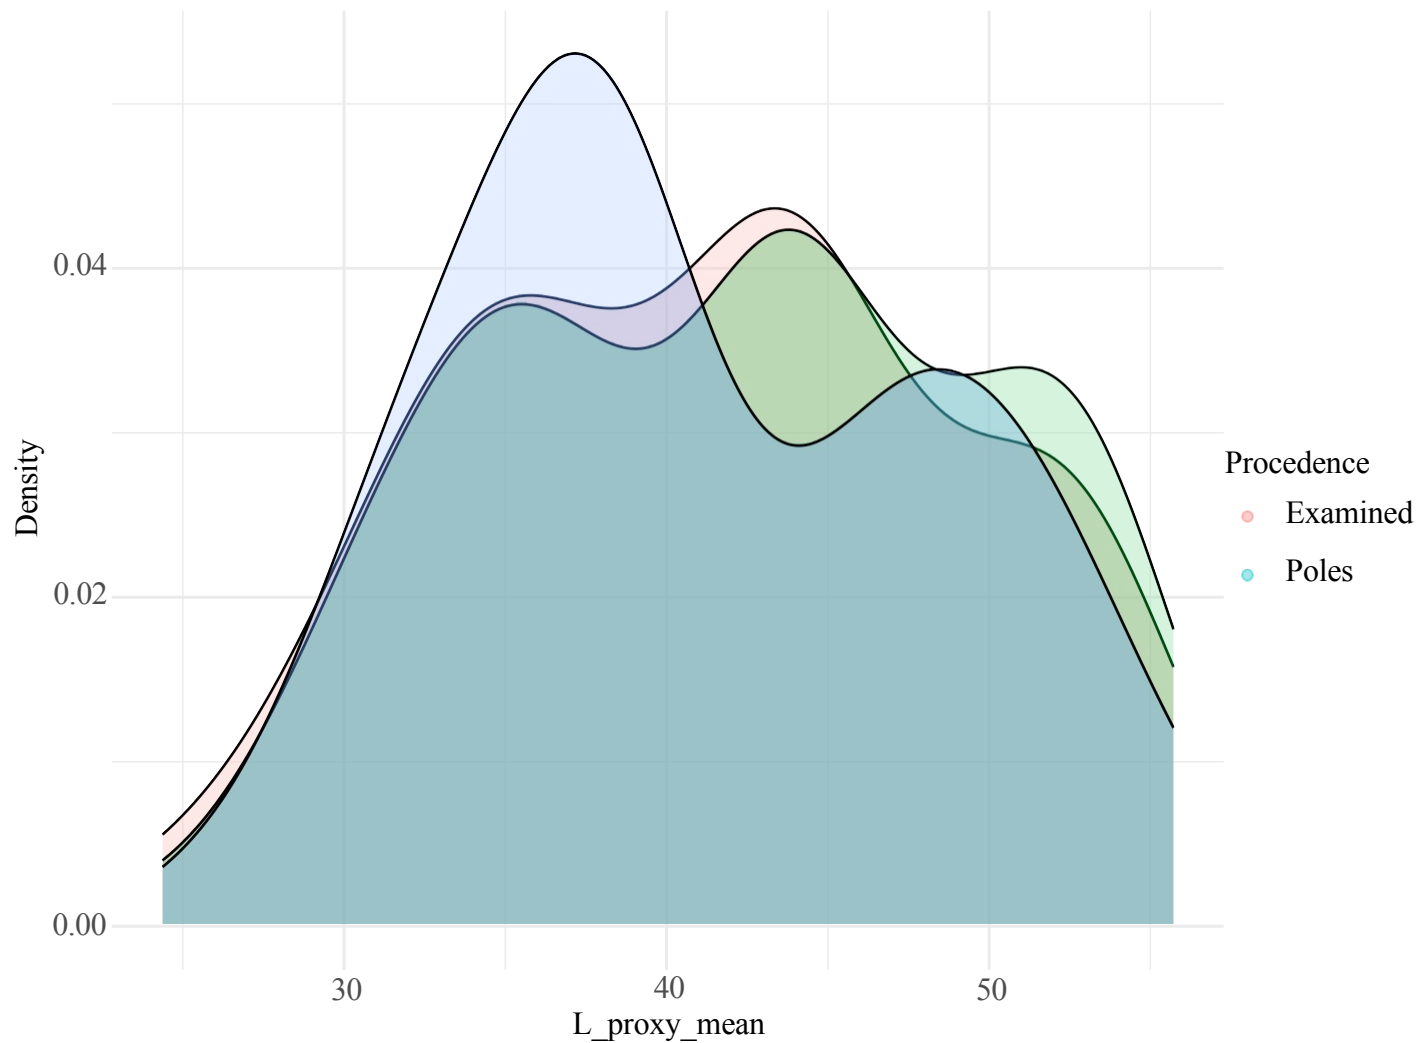

# Plains / halfbasins / Comparison with Examined & Poles

A Q-Q Plot

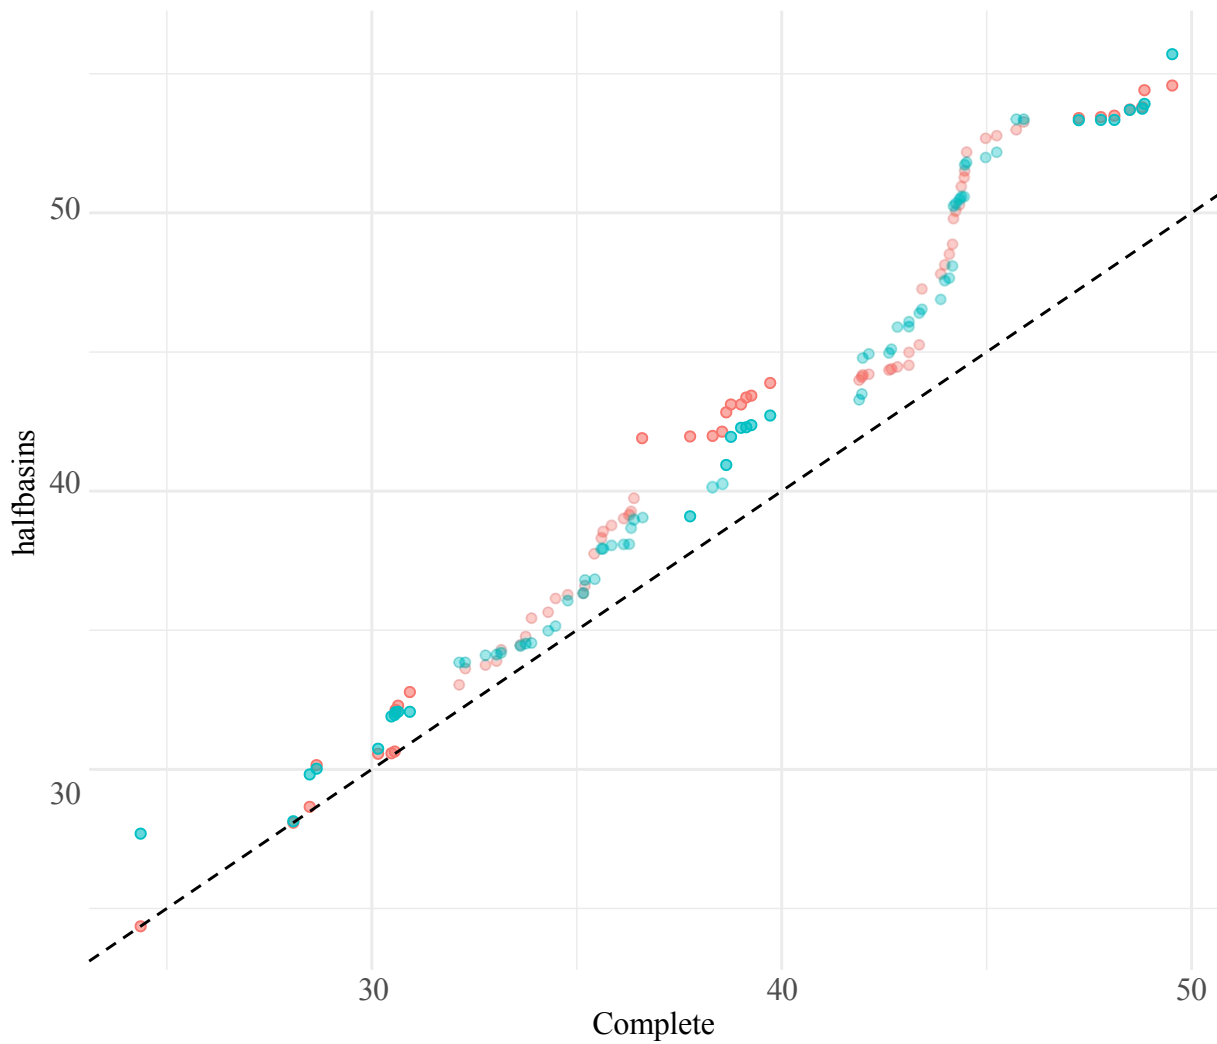

B Density plot

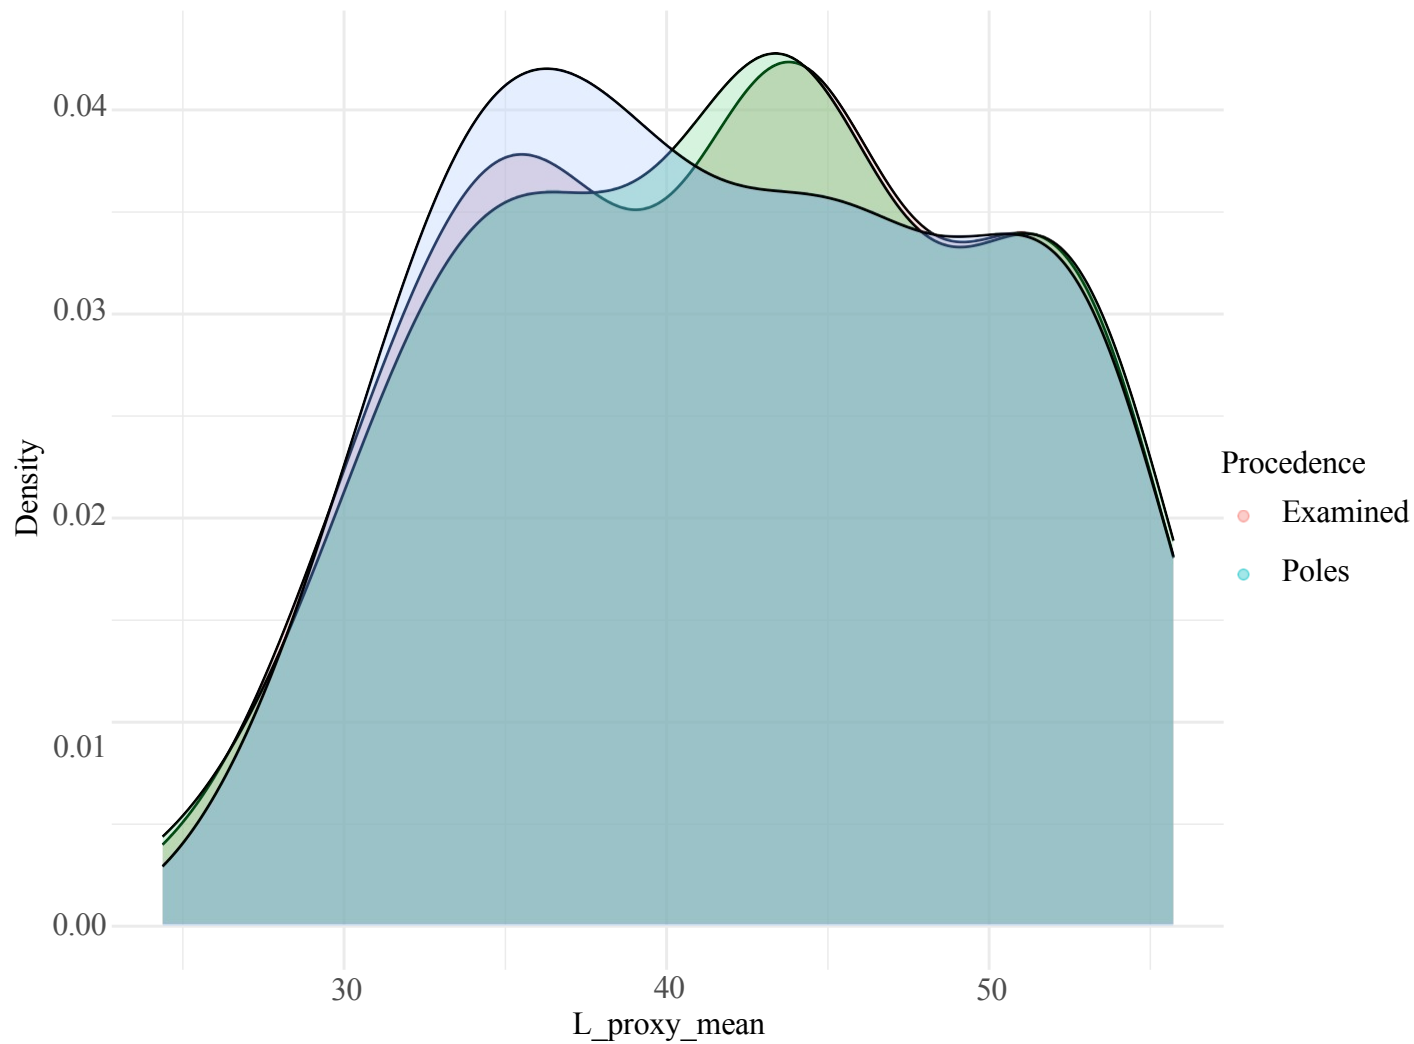

# Plains / Landcover / Comparison with Examined & Poles

A Q-Q Plot

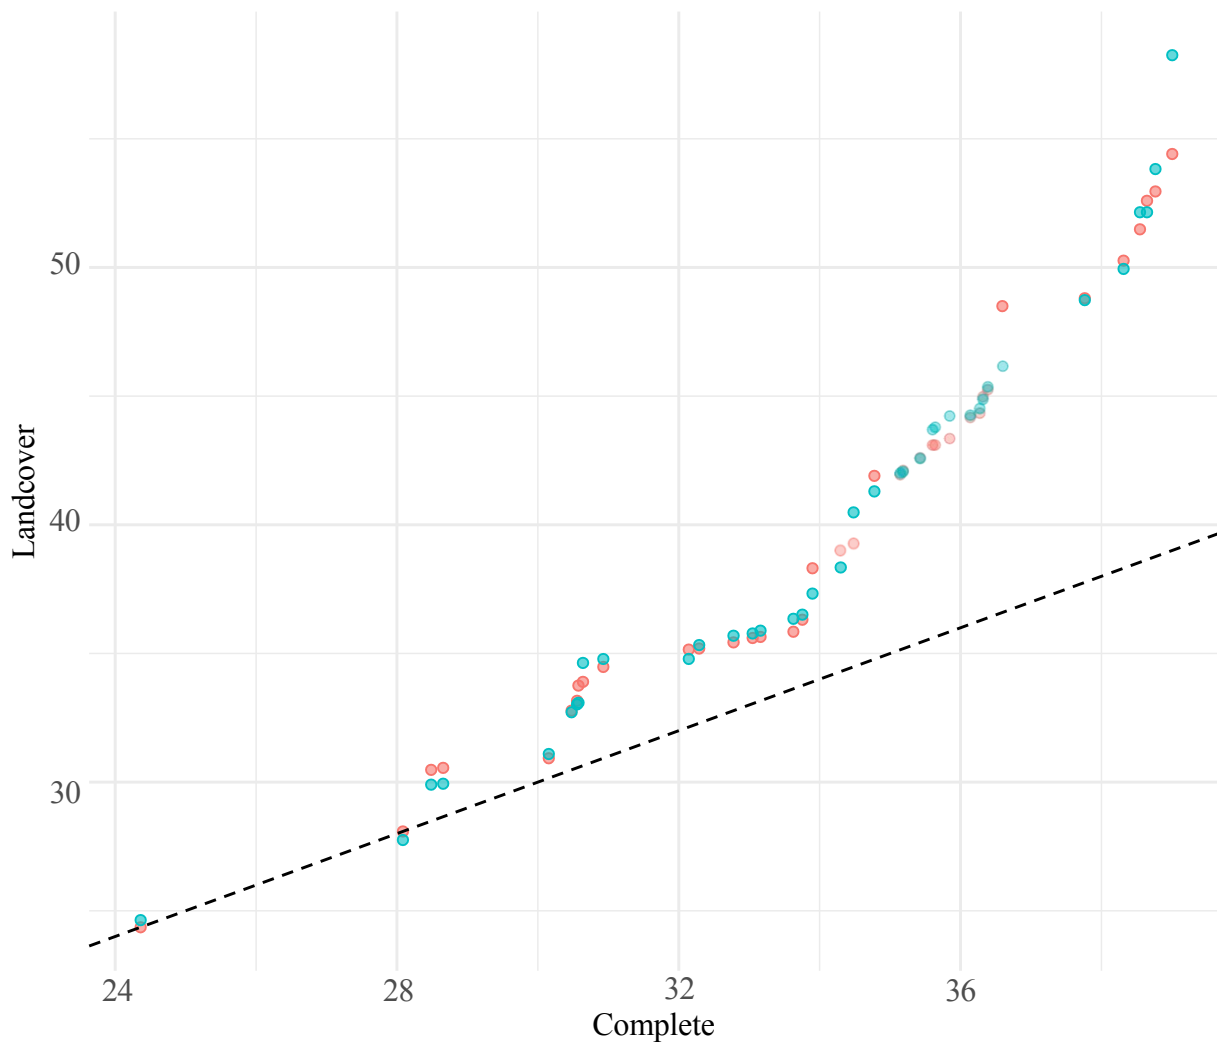

B Density plot

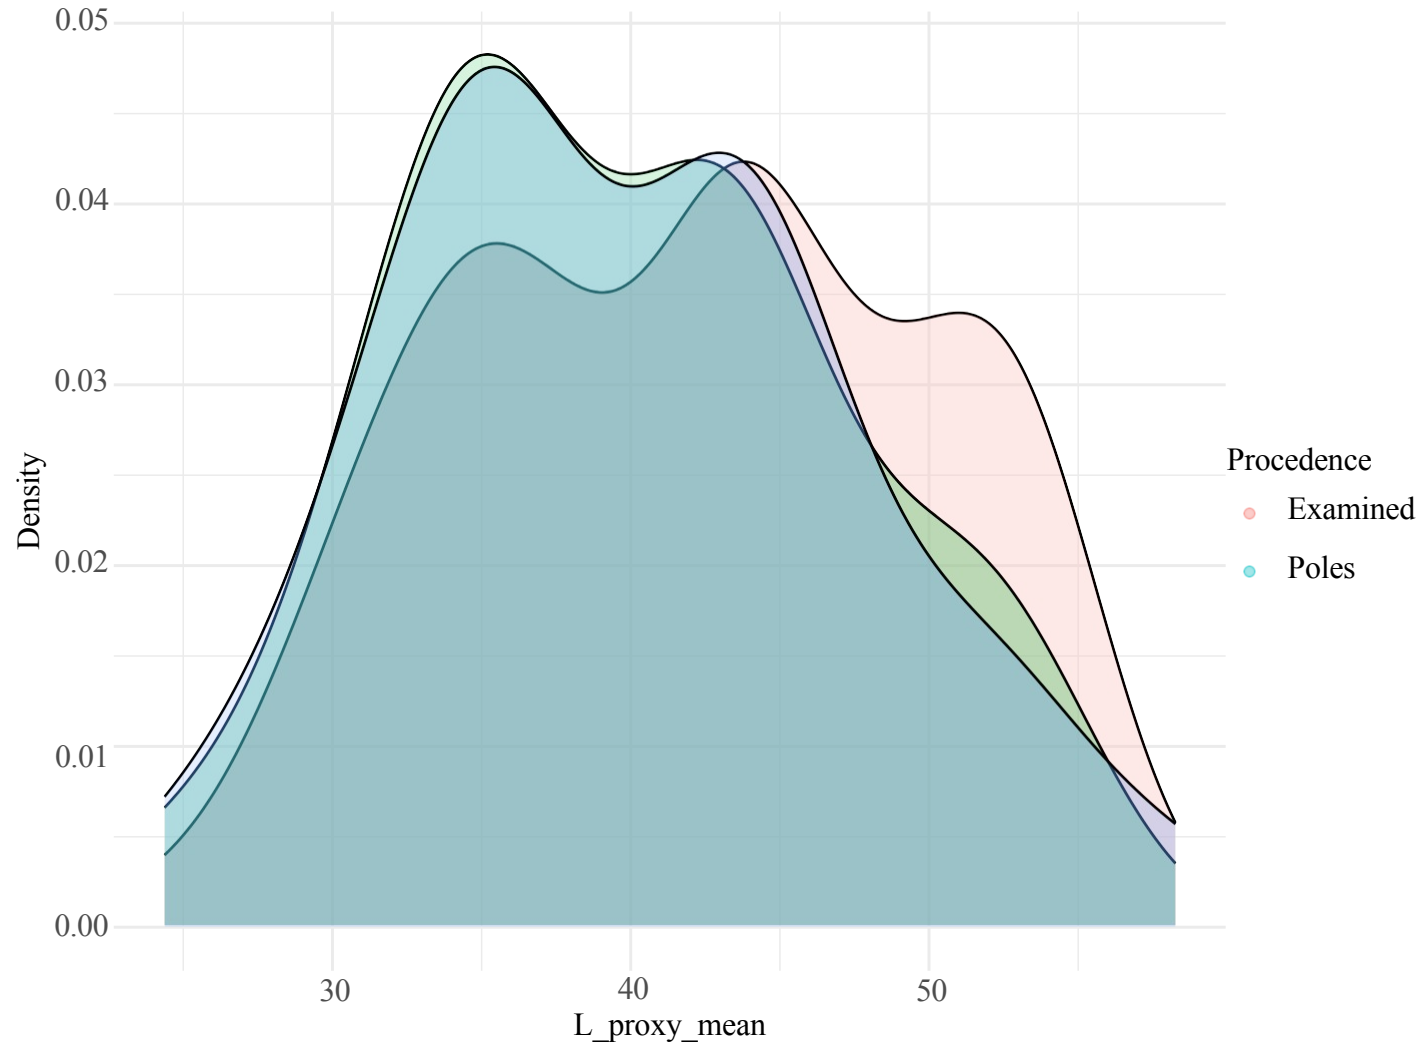

# Plains / SLIC / Comparison with Examined & Poles

A Q-Q Plot

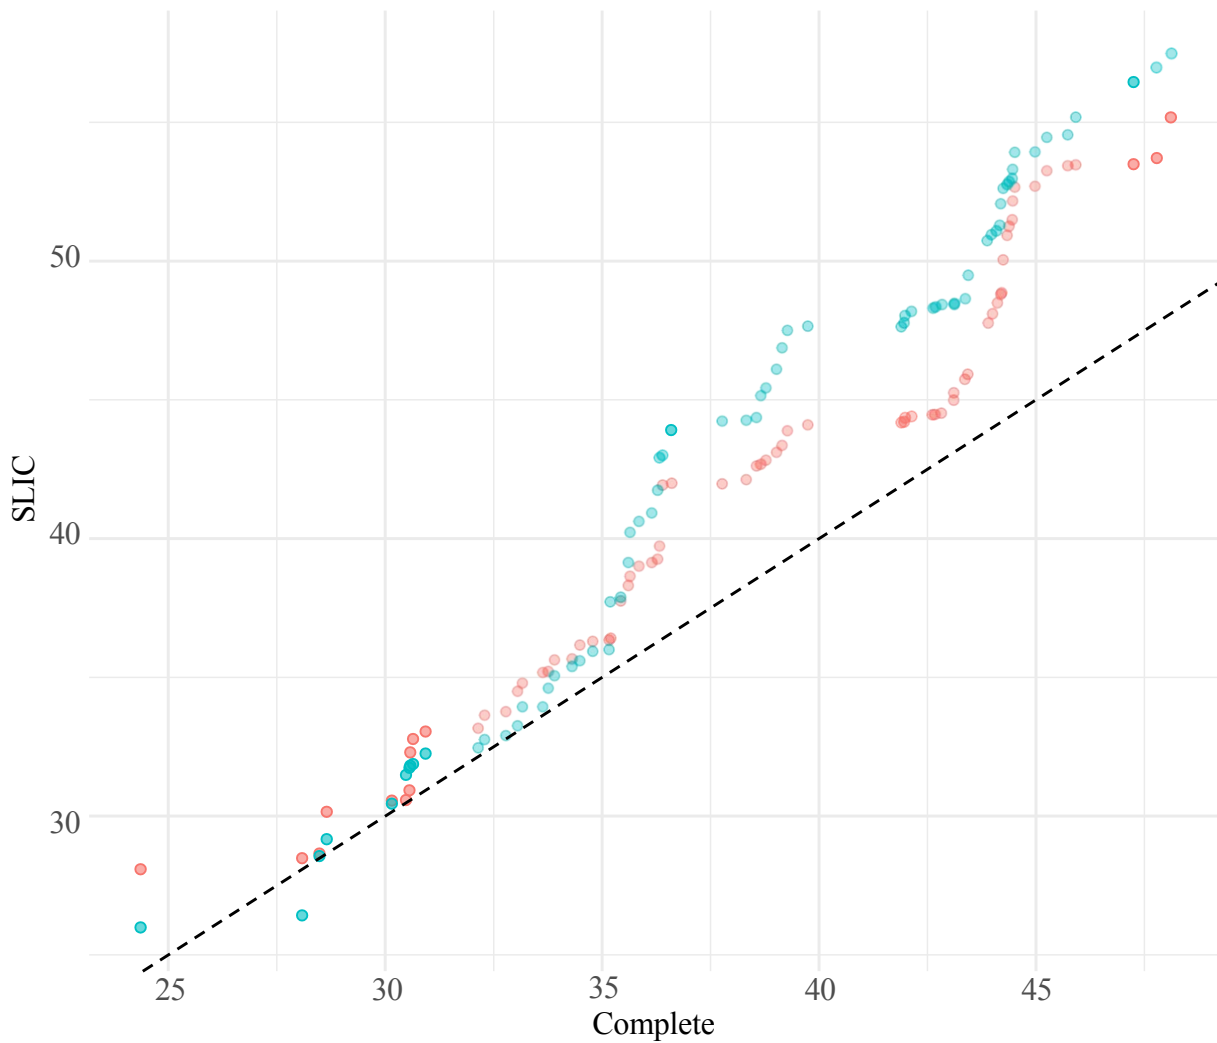

B Density plot

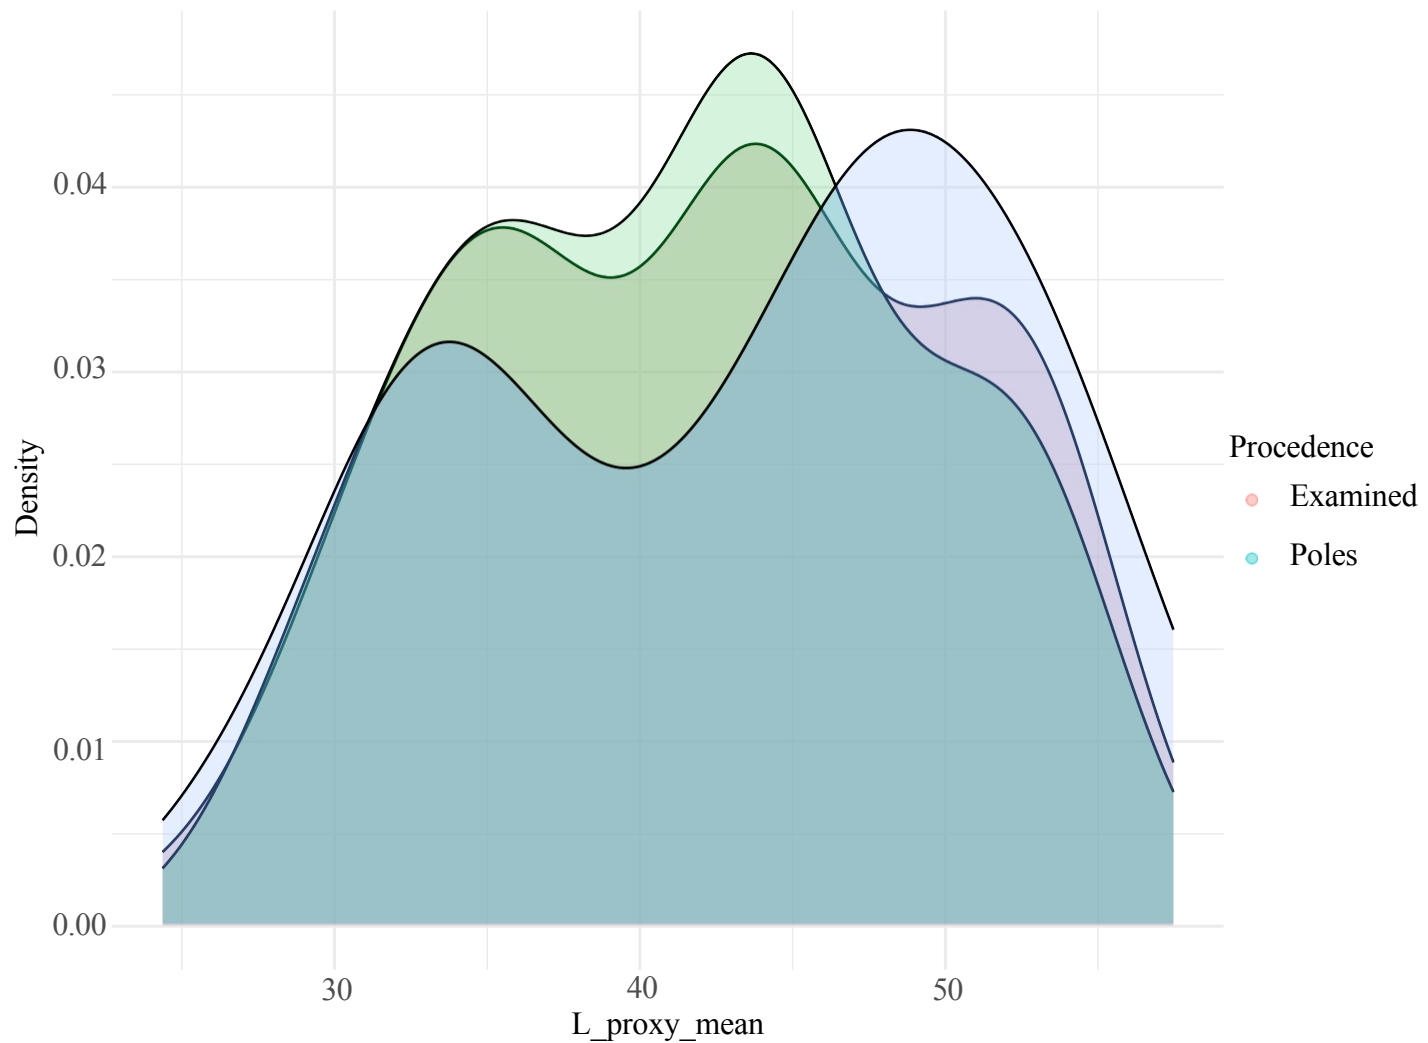

Supplement: Supplementary file 2 [file Martinez-Arias_et_al_2025_Supplementary_Information_S8.pdf › Online_Resoures-SUPPLEMENTARY_INFORMATION/Martinez-Arias_et_al_2025_Supplementary_Information_S8.pdf]
