# Supplementary material for: A workflow to optimize spatial sampling in ecoacoustic studies
Source: Research Square preprint supplement (doi:10.21203/rs.3.rs-7207339/v2), 2026-01-13
Supplement: Supplementary file 1 [file Martinez-Arias_et_al_2025_Supplementary_Information_S1-S7.pdf › Online_Resoures-SUPPLEMENTARY_INFORMATION/Martinez-Arias_et_al_2025_Supplementary_Information_S1-S7.pdf]

1   **Appendix S1: Supporting information for**

2

3   **Title:** A workflow to optimize spatial sampling in ecoacoustic studies

4

5   **Journal:** Landscape Ecology

6

7   **Authors:** Martínez-Arias, V. M.<sup>1,3</sup>; Paniagua-Villada<sup>1,3</sup>, C.; Guerrero, M.J.; Daza, J. M.<sup>1</sup>

8

9   **Author affiliations at the time the work was conducted:**

10   1 Grupo Herpetológico de Antioquia GHA, Instituto de Biología, Facultad de Ciencias Exactas y

11   Naturales, Universidad de Antioquia UdeA, Calle 70 No. 52 - 21, Medellín, Colombia.

12   2 SISTEMIC, Facultad de Ingeniería, Universidad de Antioquia UdeA, Medellín,

13   Colombia

14   3 Corporación Merceditas, Calle 3 29A-11, casa 110, Medellín, Colombia

15

16

17   **\*Corresponding author:** Victor M. Martínez Arias

18   Email: vmanuel.martinez@udea.edu.co

19

20

21

22

23

24

25

26

27

28

29

30

31

32

33

34

35

## SUPPLEMENTARY INFORMATION S1: Detailed methods for landscape proxies construction

We gathered Sentinel-2A harmonized images for each locality's bounding box using the Google Earth Engine platform (Gorelick et al. 2017). Given the availability of Sentinel-2A images, we defined a specific temporal window for each bounding box and applied a 10% cloud cover filter. Next, we generated a best-pixel mosaic for each Sentinel-2A image set (Gorelick et al. 2017; Google Earth Engine 2023a), using an NDVI-based quality mosaic algorithm. Using the generated mosaic, we constructed two types of landscape proxies: continuous and discrete.

The construction of continuous landscape proxies aimed to reflect three key landscape attributes: composition, structure, and waterbody presence (Lymburner et al. 2000; Kontsiotis et al. 2023; Patle and Ghuge 2024). To do so, we selected three spectral indices specifically related to these attributes (Table 2) that are commonly used in scientific literature and then calculated them for each bounding box.

The next step involved performing an image fusion procedure to construct a single landscape proxy. To achieve this, we scaled the selected indices based on their significance in representing landscape complexity (Table 2), using a 1-100 scale to prevent any single variable with larger variance from dominating the resulting axes (Abdi and Williams 2010). Using the scaled indices, we then performed image fusion through Principal Component Analysis (PCA) (Mishra et al. 2014). We selected PCA because it provides a concise and optimal dataset representation (Sahu and Parsai 2012), making it particularly useful for satellite imagery analysis (Mishra et al. 2014). We obtained two Principal Components (PCs), which explained a percentage of image variability. As PC1 consistently explained the highest variability (>90%) in each bounding box, we selected it as the continuous landscape proxy for the corresponding locality.

**Table S1-1.** Spectral indices derived from satellite data used to construct the landscape proxies on each location.

| Index                                                | Formula                                                 | Purpose                                                                                                                   | Scaling reference value |              |
|------------------------------------------------------|---------------------------------------------------------|---------------------------------------------------------------------------------------------------------------------------|-------------------------|--------------|
|                                                      |                                                         |                                                                                                                           | 1                       | 100          |
| <b>Normalized Difference Vegetation Index (NDVI)</b> | $(\text{NIR} - \text{Red}) / (\text{NIR} + \text{Red})$ | Measures vegetation health and biomass by comparing near-infrared (NIR) and red light reflectance (Kriegler et al. 1969). | Bare soil               | Forest units |
| <b>Specific Leaf Area</b>                            | NIR / SWIR                                              | Estimates an approximate of the leaf                                                                                      | Less leaf               | More leaf    |

|                                                           |                                                               |                                                                                                                                                                  |               |                                      |
|-----------------------------------------------------------|---------------------------------------------------------------|------------------------------------------------------------------------------------------------------------------------------------------------------------------|---------------|--------------------------------------|
| <b>Vegetation Index (SLAVI)</b>                           |                                                               | area (Lymburner et al. 2000).                                                                                                                                    | area          | area                                 |
| <b>Modified Normalized Difference Water Index (MNDWI)</b> | $(\text{Green} - \text{SWIR}) / (\text{Green} + \text{SWIR})$ | Improves water body extraction by reducing built-up land noise and enhancing water features, often used in flood monitoring and surface water mapping (Xu 2006). | Less humidity | Higher humidity, body water presence |

64

65 Discrete landscape proxies were obtained by implementing a supervised classification using  
66 Sentinel-2A bands. We performed the classification using the random forest algorithm in Google Earth  
67 Engine (Gorelick et al. 2017; Google Earth Engine 2023a), defining four land cover units: Forest,  
68 Built-up, Grass, and Tall Grass. The Forest land cover unit consists of dense vegetation with tall trees  
69 forming a closed canopy. The Built-up land cover unit includes areas dominated by human-made  
70 structures. The Grass land cover unit is characterized by a mix of herbaceous plants with occasionally  
71 scattered trees. The Tall Grass land cover unit is dominated by extensive areas of tall herbaceous plants,  
72 often reaching several meters in height.

73

74 Then, we involved generating sample points, starting with 10 per land cover class. We adjusted the final  
75 number until classification accuracy approached 80%, measured as the proportion of correctly classified  
76 pixels within land cover groups (Cansler and McKenzie 2012; Hejmanowska et al. 2021). We assessed  
77 accuracy using a confusion matrix, implemented through the errorMatrix command in Google Earth  
78 Engine (Gorelick et al. 2017; Google Earth Engine 2023b), for each classification generated within its  
79 respective bounding box.

80

81

## **SUPPLEMENTARY INFORMATION S2: Detailed methods for soundscape estimation**

Following the landscape proxies construction, we generated the soundscape proxies. After retrieving the recorders, we processed the recordings from each bounding box using an algorithm based on Power Spectrum Density (PSD) between 600 and 1200 Hz (Bedoya et al. 2017). PSD was calculated using the Welch technique, which segments the signal, applies a window to reduce discontinuities, performs a Fourier transform, and averages the periodograms (Bedoya et al. 2017). This process is used to identify and exclude corrupted and rainfall files, producing a filtered set of recordings that varied across sampling sites.

Soundscape properties were subsequently quantified using a set of acoustic indices implemented primarily through the Scikit-Maad Python package (Ulloa et al. 2021), complemented by custom routines for specific metrics. All indices were computed either directly from the PSD or from spectrogram-derived representations, ensuring consistency in time-frequency resolution across recordings. Consequently, the indices describe patterns of acoustic energy distribution and variability in the time-frequency domain, rather than explicitly identifying sound sources or taxa.

Specifically, we selected five acoustic indices, Acoustic Complexity Index in its temporal (ACItf) and spectral (ACIf) formulations, Bioacoustic Index (BI), Normalized Difference Soundscape Index (NDSI), and Number of peaks (NP) (see S2-1), to capture complementary aspects of soundscape structure, including temporal modulation, spectral variability, energy concentration, and spectral fragmentation (Sánchez-Giraldo et al. 2021; Luna-Naranjo et al. 2024). Although some of these indices are commonly interpreted in relation to biophonic or anthropogenic activity, such interpretations are conceptual generalizations rather than explicit source classifications. Accordingly, all indices were treated here as operational proxies of soundscape structure. In particular, indices based on predefined frequency bands (BI and NDSI), were interpreted as relative indicators of spectral dominance, acknowledging that frequency overlap among biological, anthropogenic and abiotic sounds is common and that source separation is not explicit.

Except for BI and NDSI, which rely on standard frequency ranges to preserve comparability with previous studies, we calculated the indices for the 0-24, 0-12, and 12-24 kHz bands to consider scale variation at the frequency level. We considered the temporal scale using the hour ranges defined by Rendon et al. (2025): 05:00-08:00 (dawn), 17:00-20:00 (evening), and the complete day. For each recorder, multiple recordings within each period were summarized using the median value of each index, providing a robust representation of site-level soundscape properties for subsequent spatial interpolation and analysis.

For the ultrasonic band (24-96 kHz) we calculated Number of peaks (NP) Bioacoustic Index (BI) and the Acoustic Complexity Index (ACItf, ACIf). We remark that the Acoustic Complexity Indices (ACItf,

ACIf<sub>t</sub>) were computed using different spectral representations depending on the frequency domain, reflecting a precautionary and domain-specific analytical strategy. For the audible range, ACI's were calculated from power spectrograms (PSD). This choice was made to emphasize energetic contrasts in the audible spectrum and to evaluate the sensitivity of spatial sampling designs under the most conservative and contrasting conditions, thereby maximizing the detection of differences among sampling strategies. Power-based representations also ensured numerical stability and methodological consistency with other energy-based indices used in this study (e.g., BI, NP, and NDSI).

In contrast, for the ultrasonic range, ACI's were computed from amplitude spectrograms rather than power. This decision was motivated by the properties of the ACI formulation and by the need to avoid spurious inflation of variability and false positives in high-frequency, low-energy signals. In this case, calculations followed the amplitude-based formulation with edge-effect correction as proposed by Farina and Li (2022), including temporal clumping and boundary correction, which are better suited for ultrasonic signals characterized by sparse, transient acoustic events.

**Table S2-1.** Summary of selected acoustic indices used in soundscape proxy interpolations, their definitions, applications, and methodological considerations

| Index                                               | Description                                                                                                                                                                                                                                                                                                                                                                                                                                                                                                                                                                         | Applications                                                                                                                         | Frecuencies |
|-----------------------------------------------------|-------------------------------------------------------------------------------------------------------------------------------------------------------------------------------------------------------------------------------------------------------------------------------------------------------------------------------------------------------------------------------------------------------------------------------------------------------------------------------------------------------------------------------------------------------------------------------------|--------------------------------------------------------------------------------------------------------------------------------------|-------------|
| <b>Acoustic Complexity Index (ACIf<sub>t</sub>)</b> | Quantifies temporal variability in acoustic energy by measuring frame-to-frame changes in amplitude over time within a defined frequency band. Although originally proposed to capture biological activity, ACIf <sub>t</sub> reflects general temporal modulation and may incorporate biotic, anthropogenic, or abiotic sounds depending on their temporal dynamics. Computed from the power spectral density, with no border correction for audible spectrum. Calculated from amplitude and border correction for ultrasound spectrum (Pieretti et al. 2011; Farina and Li 2022). | Indicator of temporal soundscape activity and variability in ecoacoustic and environmental monitoring studies (Alcocer et al. 2022). | A, U        |
| <b>Acoustic Complexity</b>                          | Quantifies spectral variability by measuring changes in                                                                                                                                                                                                                                                                                                                                                                                                                                                                                                                             | Characterization and spatial and spectral                                                                                            | A, U        |

|                                                 |                                                                                                                                                                                                                                                                                                                                                                                     |                                                                                                                                                   |      |
|-------------------------------------------------|-------------------------------------------------------------------------------------------------------------------------------------------------------------------------------------------------------------------------------------------------------------------------------------------------------------------------------------------------------------------------------------|---------------------------------------------------------------------------------------------------------------------------------------------------|------|
| <b>Index (ACIf)</b>                             | acoustic energy across frequency bins at each temporal step. This index captures patterns of spectral modulation rather than sound source identity. Computed from the power spectral density, with no border correction for audible spectrum. Calculated from amplitude and border correction for ultrasound spectrum (Farina and Li 2022).                                         | soundscape structure across landscapes (Alcocer et al. 2022).                                                                                     |      |
| <b>Bioacoustic Index (BI)</b>                   | Measures the area under the mean frequency spectrum within a predefined band commonly 2–8 kHz or 2–12kHz, reflecting concentration of acoustic energy in mid-frequencies. Although often associated with biophonic activity, BI integrates all sound sources present in the selected band (Boelman et al. 2007). We also calculated it for ultrasonic range (24-96 kHz)             | Effective for analyzing biophonic sounds, robust to microphone gain (Alcocer et al. 2022).                                                        | A, U |
| <b>Normalized Difference Sound Index (NDSI)</b> | Compares acoustic energy between two predefined frequency bands, traditionally interpreted as biophony and anthropophony. This separation is theoretical, as both biological and anthropogenic sounds can occur across overlapping frequencies. NDSI therefore represents a relative measure of spectral dominance rather than a strict source classification (Kasten et al. 2012). | Assessment of relative anthropogenic influence and large-scale soundscape gradients, with context-dependent interpretation (Alcocer et al. 2022). | A    |
| <b>Number of</b>                                | Counts the number of prominent peaks in the mean                                                                                                                                                                                                                                                                                                                                    | Description of spectral complexity                                                                                                                | A, U |

|                   |                                                                                                                                                                                                                                  |                                                                   |  |
|-------------------|----------------------------------------------------------------------------------------------------------------------------------------------------------------------------------------------------------------------------------|-------------------------------------------------------------------|--|
| <b>Peaks (NP)</b> | frequency spectrum, within a defined frequency range, reflecting spectral fragmentation or tonal richness. NP i sensitive to the presence of multiple frequency components but does not discriminate among sound sources or taxa | and heterogeneity in comparative and spatial soundscape analyses. |  |
|-------------------|----------------------------------------------------------------------------------------------------------------------------------------------------------------------------------------------------------------------------------|-------------------------------------------------------------------|--|

138 Selected acoustic indices. A=Audible bands; U= Ultrasound bands.

139

## **SUPPLEMENTARY INFORMATION S3: Detailed information on SLIC and Watershed tessellation construction**

We performed sub sampling from the original grid arrangement by removing points using two different criteria: random and stratified. To obtain random scenarios, we selected 20%, 40%, 60%, and 80% of the original grid and iterated this procedure 50 times for each scheme. For the stratified scenarios, we employed four different landscape segmentation approaches: landcover, SLIC (Simple Linear Iterative Clustering), and watershed-derived Basins and Halfbasins. We used the landcover segmentation obtained from the previously performed landcover reclassification, which served as the discrete landscape proxy.

Although the landcover reclassification is a segmentation itself, it does not define a minimum area size and is used as-is. Then, our next step was to define this area value by taking our distance of Audiomoth recorders influence as base parameter ( $r = 200\text{m}$ ), then we calculate the total area ( $A_i = 125644\text{m}^2$ ). We used this value for the other heterogeneity-based segmentation methods we applied: SLIC and watershed-derived tessellation.

The SLIC tessellation procedure is widely used in remote sensing (Achanta et al. 2012; Nowosad and Stepinski 2021). Is a spatially constrained variant of k-means, designed to segment an image into visually homogeneous regions (Achanta et al. 2012; Nowosad and Stepinski 2021). This method assigns search windows to regularly spaced centers, combining spatial and value distances for each cell (Nowosad and Stepinski 2021). We took the area ( $A_i$ ) and divided it by the total bounding box area to calculate the K parameter, and then, construct the tessellation using the supercells R package (Nowosad & Stepinski, 2021).

To complement SLIC segmentation, we applied watershed tessellation, a method widely used for ecosystem boundary definition, flood risk assessment, and image analysis (Bormann and Likens 1979; Palomino and Hilares 2011; Gamarra et al. 2019; Moreira and Dos Santos 2020). This method is based on mathematical morphology and segments images by grouping pixels according to proximity, gradient, and texture homogeneity (Palomino and Hilares 2011). Here, we used the area ( $A_i$ ) to define the basin threshold in pixels and divided this value by the continuous landscape proxy pixel size ( $100\text{m}^2$ ). We then applied the `r.watershed` algorithm in GrassGIS to compute watersheds (GRASS Development Team 2022). We selected this algorithm because it generates not only Basins, but also generates Halfbasins, providing an additional tessellations for our analysis (Moreira and Dos Santos 2020).



176 **SUPPLEMENTARY INFORMATION S4: detailed information**  
177 **regarding spatial interpolation of acoustic indices**

178 With the full grid and the selected subsamples, we generated soundscape surfaces using spatial kriging  
179 interpolation of the acoustic indices median. Kriging is a variogram-based interpolation method that  
180 accounts for spatial autocorrelation and data trends, allowing us to assess the effectiveness of different  
181 sampling designs in capturing spatial variations (Zarco-Perello and Simões 2017; Amelia et al. 2023).  
182 The first step of kriging interpolation consists in compute an empirical variogram to describe how spatial  
183 dependence varies with distance, based on variance between paired observations. We did this using the  
184 Hawkins-Cressie estimator with a Matérn model, applying a fixed range of 200m based on Audiomoth  
185 influence. We selected the Hawkins-Cressie estimator for its robustness to outliers in noisy soundscape  
186 data and the Matérn model for its flexibility in modeling spatial correlations, which is essential for  
187 capturing soundscape variability (Cressie and Hawkins 1980; Fernández Casal and Cotos Yáñez 2019).  
188 As result, we obtain the nugget (microscale variation) and the sill (total variance) parameters.

189  
190 The second step involved using the generated nugget and sill parameters to calculate the theoretical  
191 variogram with the Matérn model. To achieve this, we constructed a 10m resolution grid and performed  
192 ordinary kriging interpolation, applying cross-validation to determine the Root Mean Square Error  
193 (RMSE) (Fernández Casal and Cotos Yáñez 2019). We used the Scikit-GStat Python package to calculate  
194 the empirical variogram and the GStat R package for the theoretical variogram and spatial interpolation  
195 (Gräler et al. 2016; Mälicke 2022).

196  
197

**SUPPLEMENTARY INFORMATION S5: Associated statistics with objective 1: Evaluation of the sample size effect over sampling strategies**

**Sampling percent for each tessellation method**

Table S5-1 reports the mean and standard deviation of the percentage of recorder locations retained by each subsampling strategy relative to the original sampling grid, summarized by locality. Values integrate variation across acoustic indices, frequency bands, and time periods. Minor differences among strategies and localities reflect quality-control filtering of recordings prior to temporal aggregation.

**Table S5-1. Percent of the original sample, for each tessellation method as subsampling strategy**

| Locality    | Strategy   | Mean<br>Percent of<br>original<br>sample | SD   |
|-------------|------------|------------------------------------------|------|
| AndeanRural | Landcover  | 55.92                                    | 0.49 |
| AndeanUrban | Landcover  | 42.59                                    | 0.00 |
| Plains      | Landcover  | 38.87                                    | 0.98 |
| AndeanRural | SLIC       | 72.05                                    | 1.66 |
| AndeanUrban | SLIC       | 92.59                                    | 0.00 |
| Plains      | SLIC       | 73.78                                    | 1.36 |
| AndeanRural | basins     | 67.86                                    | 2.31 |
| AndeanUrban | basins     | 92.59                                    | 0.00 |
| Plains      | basins     | 59.39                                    | 1.50 |
| AndeanRural | halfbasins | 72.07                                    | 1.24 |
| AndeanUrban | halfbasins | 98.15                                    | 0.00 |
| Plains      | halfbasins | 78.09                                    | 1.47 |
| AndeanRural | ssample20  | 18.63                                    | 0.66 |
| AndeanUrban | ssample20  | 18.52                                    | 0.00 |
| Plains      | ssample20  | 19.78                                    | 0.01 |
| AndeanRural | ssample40  | 38.99                                    | 0.42 |
| AndeanUrban | ssample40  | 38.89                                    | 0.00 |
| Plains      | ssample40  | 39.57                                    | 0.01 |

|             |           |       |      |
|-------------|-----------|-------|------|
|             |           |       |      |
| AndeanRural | ssample60 | 58.47 | 0.45 |
| AndeanUrban | ssample60 | 59.26 | 0.00 |
| Plains      | ssample60 | 59.35 | 0.02 |
| AndeanRural | ssample80 | 78.83 | 0.60 |
| AndeanUrban | ssample80 | 79.63 | 0.00 |
| Plains      | ssample80 | 79.14 | 0.02 |

## Normality assessment for pearson correlation representing the sample size effect, between the performance and sample percent

To quantify the effect of sample size on sampling design, we computed another Pearson coefficient, (Pcoeff2) between the percentage of sampled data for each subsample, and the previously calculated subsample performance. To assess effects different from those of the subsample design, we calculated this new Pearson coefficient, across combinations of locality, strategy, frequency range, time period, acoustic index, and summary statistic using the `ggstatsplot` package (Patil 2021). We did this, since we aimed to take into account with varying ecological and methodological conditions. To assess the statistical properties of the Pearson coefficient distributions representing the effect of sample size, we applied the Shapiro-Wilk test for normality within each sub sampling strategy using the `rstatix` package (Kassambara 2019). Since most distributions deviated from normality, we proceeded with non-parametric statistical tests (Supplementary information S1). sub sampling strategies were grouped into two major categories: "random" and "tessellation". We compared the sample size effect Pearson's values between these groups using the Wilcoxon rank-sum test and quantified differences in dispersion using the Fligner-Killeen test, which is robust to non-normal distributions (Sarkar et al. 1999).

**Table S5-2.** Shapiro-Wilks test for sample size effect for evaluate normality in the size dependence of the original sample.

| NORMALITY TEST FOR SAMPLE SIZE EFFECT |            |          |             |             |
|---------------------------------------|------------|----------|-------------|-------------|
| Calc_stat                             | Subsample  | variable | statistic   | p           |
| median                                | Landcover  | estimate | 0.757726226 | 4.30567E-06 |
| median                                | SLIC       | estimate | 0.918701454 | 0.007932343 |
| median                                | basins     | estimate | 0.840735609 | 6.53985E-05 |
| median                                | halfbasins | estimate | 0.553122704 | 5.57313E-10 |
| median                                | ssample20  | estimate | 0.95751788  | 0.120301316 |
| median                                | ssample40  | estimate | 0.965232823 | 0.226478957 |

|        |           |          |             |             |
|--------|-----------|----------|-------------|-------------|
| median | ssample60 | estimate | 0.959536953 | 0.142150633 |
| median | ssample80 | estimate | 0.900798438 | 0.001521112 |

232

233 This table presents the results of Shapiro-Wilk tests applied to evaluate whether the distributions of the sample size effect (i.e.,  
234 correlation between sample proportion and subsample performance) follow a normal distribution, across different sub sampling  
235 strategies and random sample sizes. Values are based on median statistics. Most tessellation-based strategies (Landcover, SLIC,  
236 Basins, Halfbasins) show significant deviations from normality ( $p < 0.01$ ), justifying the use of non-parametric tests in subsequent  
237 comparisons. In contrast, random sampling levels at 20%, 40%, and 60% did not significantly deviate from normality.

238

239

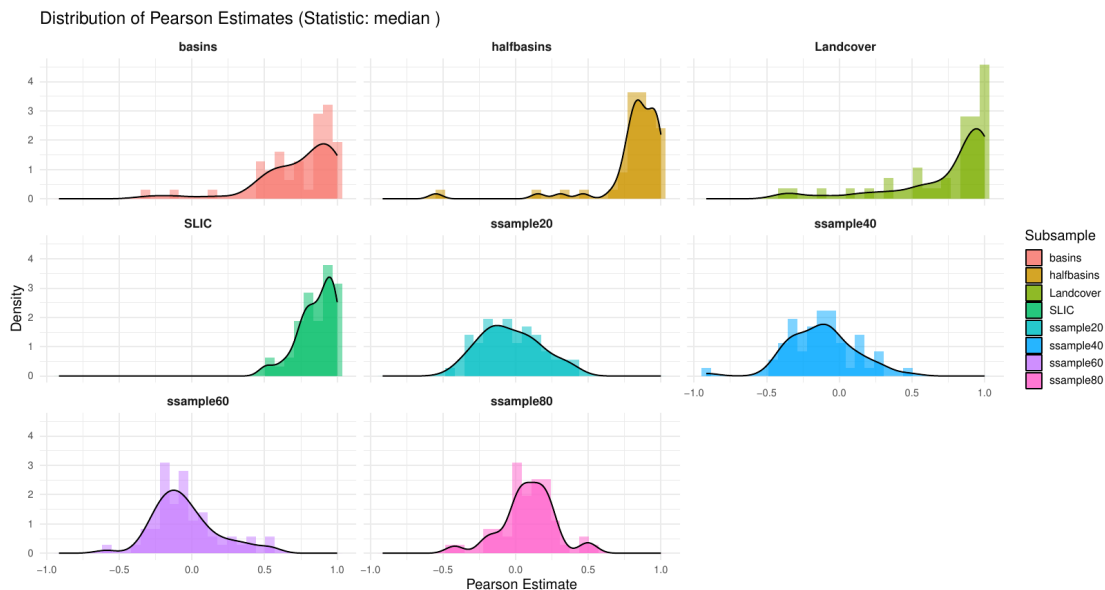

240

241 **Figure S5-1** Pearson coefficient (Pcoeff2) value distributions representing sampling size effect for each  
242 subsample type, obtained with the median values of the original subsample performance.

243 Density plots show the distributions of Pearson correlation values calculated between sampling proportion and subsample  
244 performance, stratified by subsample type. Tessellation-based strategies (basins, halfbasins, landcover, SLIC) and random sampling  
245 levels (20%, 40%, 60%, 80%) are shown using kernel density estimation. Results are based on median performance values. Non-  
246 normality is visually evident for most tessellation strategies, with skewed and mult imodal distributions, while random sub sampling  
247 levels appear more symmetrically distributed. These patterns support the application of non-parametric tests for group comparisons  
248 (see Table S5-1).

249

250

251

## **SUPPLEMENTARY INFORMATION S6: Detailed methods for the developemnt of the specific objective 2: Effectiveness of stratified sampling designs evaluation**

We evaluated the effectiveness of stratified sampling strategies using two metrics: subsample performance and sampling efficiency. Subsample performance was previously defined as the Pearson correlation ( $\rho$ ) between the interpolated surface from each subsample and the corresponding full grid. To quantify how well each strategy balances performance and effort, we calculated sampling efficiency as the ratio of performance to sampling proportion (Subsample performance / %sampled). This approach allowed us to identify designs that not only reproduce spatial patterns effectively, but also do so with fewer sampling units. For both metrics, we computed summary statistics (mean, median, standard deviation, and coefficient of variation). We did this to capture not only the central tendency of each strategy's performance, but also its variability and reliability across iterations and conditions. This allowed us to assess whether high performance was consistent or driven by outliers, and to identify strategies that offered both effectiveness and robustness.

To assess the need for further subgroup analyses by factors such as time period, locality, or frequency range, we evaluated summary statistics for each tessellation strategy. Given the consistency in performance metrics across strategies (median Pearson  $> 0.89$ , low to moderate coefficient of variation), we did not perform additional subgroup analyses by time period, frequency range, or locality (See supplementary information). The next step consisted in a normality assessment. To do so, we took separately the distribution of performance and the efficiency and tested individually for normality within each subsample group using the Shapiro-Wilk test (`shapiro_test()` from the `rstatix` package). Then, we generated violin plots with overlaid boxplots to compare distributions across strategies. Due to non-normality of our data, the differences between sub sampling strategies were evaluated using Kruskal-Wallis rank-sum tests, followed by Dunn's post hoc tests with Benjamini-Hochberg adjustment for multiple comparisons. All analyses were performed for both median and mean using R 4.4.0 "Puppy Cup", with the following packages: `dplyr` for data wrangling, `ggplot2` and `ggpubr` for visualization, `rstatix` for statistical tests, and `FSA` for post hoc comparisons (Wickham 2011; Wickham et al. 2014; Kassambara 2023; R Core Team 2024; Ogle et al. 2025).

**Table S6-1** Normality assessment for tile's performance (raster's Pearson correlation)

| Evaluated             | Raster's Comparison Statistic | Subsample Type | Statistic   | p        |
|-----------------------|-------------------------------|----------------|-------------|----------|
| Subsample performance | MEDIAN                        | Landcover      | 0.715326335 | 8.28E-08 |
|                       | MEDIAN                        | SLIC           | 0.904062478 | 8.53E-04 |
|                       | MEDIAN                        | basins         | 0.805484608 | 2.11E-06 |
|                       | MEDIAN                        | halfbasins     | 0.587809278 | 1.29E-10 |

Normality was assessed for each tessellation strategy using Pearson correlation values between interpolated surfaces and full sampling grids. Results are based on median summary statistics of subsample performance. All strategies except Landcover exhibited significant deviations from normality ( $p < 0.05$ ), justifying the use of non-parametric analyses in subsequent tests.

**Table S6-2** Results of Kruskal-Wallis Test on the raster precision of sampling strategy (Sub sample performance)

| Evaluated  | Evaluated Metric      | Raster's Comparison Statistic | n   | statistic  | df | p        |
|------------|-----------------------|-------------------------------|-----|------------|----|----------|
| Audible    | Subsample performance | MEDIAN                        | 489 | 194.444517 | 3  | 6.69E-42 |
| Ultrasound | Subsample performance | MEDIAN                        | 107 | 53.9936393 | 3  | 1.13E-11 |

A Kruskal-Wallis rank-sum test was performed to assess whether subsample performance differed significantly across tessellation-based strategies (basins, halfbasins, SLIC, landcover). Median performance values were used. The results revealed strong overall differences among groups ( $\chi^2 = 194.44$ ,  $p < 0.001$ ).

**Table S6-3** Results of Kruskal-Wallis Test on the efficiency of sampling strategy (Subsample performance /Sample%)

| Evaluated  | Evaluated Metric | Raster's comparison Statistic | n   | statistic   | df | p        |
|------------|------------------|-------------------------------|-----|-------------|----|----------|
| Audible    | Efficiency       | MEDIAN                        | 489 | 187.7701344 | 3  | 1.85E-40 |
| Ultrasound | Efficiency       | MEDIAN                        | 107 | 42.1535577  | 3  | 3.72E-09 |

|   |  |  |  |  |  |  |
|---|--|--|--|--|--|--|
| d |  |  |  |  |  |  |
|---|--|--|--|--|--|--|

301  
302 This test evaluated differences in sampling efficiency—defined as the ratio of subsample performance to sampling proportion—  
303 across the four tessellation strategies. Results based on median values indicated significant variation among strategies ( $\chi^2 =$   
304 187.77,  $p < 0.001$ ), supporting subsequent pairwise post hoc analyses.

305 **Table S6-4** Post hoc Dunn test results for subsample performance across tessellation strategies.

| Frequency  | Evaluated Metric      | Raster's Comparison Statistic | group1     | group2     | n1  | n2  | statistic | p        | p.adj    | p.adj. Signif. |
|------------|-----------------------|-------------------------------|------------|------------|-----|-----|-----------|----------|----------|----------------|
| Audible    | Subsample performance | MEDIAN                        | basins     | halfbasins | 123 | 125 | 3.1677    | 1.54E-03 | 1.84E-03 | **             |
|            |                       |                               | basins     | Landcover  | 123 | 118 | -10.0837  | 6.52E-24 | 1.96E-23 | ****           |
|            |                       |                               | basins     | SLIC       | 123 | 123 | -0.5753   | 5.65E-01 | 5.65E-01 | ns             |
|            |                       |                               | halfbasins | Landcover  | 125 | 118 | -13.2579  | 4.06E-40 | 2.44E-39 | ****           |
|            |                       |                               | halfbasins | SLIC       | 125 | 123 | -3.7453   | 1.80E-04 | 2.70E-04 | ***            |
|            |                       |                               | Landcover  | SLIC       | 118 | 123 | 9.5145    | 1.83E-21 | 3.65E-21 | ****           |
| Ultrasound | Subsample performance | MEDIAN                        | basins     | halfbasins | 26  | 27  | 1.5283    | 1.26E-01 | 1.90E-01 | ns             |
|            |                       |                               | basins     | Landcover  | 26  | 27  | -5.0740   | 3.89E-07 | 7.79E-07 | ****           |
|            |                       |                               | basins     | SLIC       | 26  | 27  | 0.6856    | 4.93E-01 | 4.93E-01 | ns             |
|            |                       |                               | halfbasins | Landcover  | 27  | 27  | -6.6655   | 2.64E-11 | 1.58E-10 | ****           |
|            |                       |                               | halfbasins | SLIC       | 27  | 27  | -0.8507   | 3.95E-01 | 4.74E-01 | ns             |
|            |                       |                               | Landcover  | SLIC       | 27  | 27  | 5.8148    | 6.07E-09 | 1.82E-08 | ****           |

306  
307 Pairwise comparisons were conducted using Dunn's test with Benjamini-Hochberg correction following a significant Kruskal-Wallis test on subsample performance (median Pearson correlation). The results indicate  
308 that Landcover significantly underperformed all other strategies, while Basins and SLIC showed no significant difference ( $p_{adj} > 0.05$ ). Asterisks indicate the level of significance after adjustment.

309  
310 **Table S6-5** Post hoc Dunn test results for sampling efficiency across tessellation strategies (Subsample performance/Sample%)

| Frequency | Evaluated Metric                   | Raster's Comparison Statistic | group1 | group2     | n1  | n2  | statistic | p        | p.adj    | p.adj. Signif. |
|-----------|------------------------------------|-------------------------------|--------|------------|-----|-----|-----------|----------|----------|----------------|
| Audible   | Efficiency (S. performance/Sample) | MEDIAN                        | basins | halfbasins | 123 | 125 | -4.0125   | 6.01E-05 | 7.21E-05 | ****           |
|           |                                    |                               | basins | Landcover  | 123 | 118 | 7.7825    | 7.11E-15 | 1.42E-14 | ****           |



|            |                                            |        |            |            |     |     |          |          |          |      |
|------------|--------------------------------------------|--------|------------|------------|-----|-----|----------|----------|----------|------|
|            | %)                                         |        | basins     | SLIC       | 123 | 123 | -4.2995  | 1.71E-05 | 2.57E-05 | **** |
|            |                                            |        | halfbasins | Landcover  | 125 | 118 | 11.7835  | 4.75E-32 | 1.42E-31 | **** |
|            |                                            |        | halfbasins | SLIC       | 125 | 123 | -0.3043  | 7.61E-01 | 7.61E-01 | ns   |
|            |                                            |        | Landcover  | SLIC       | 118 | 123 | -12.0371 | 2.27E-33 | 1.36E-32 | **** |
| Ultrasound | Efficiency (S.<br>performance/Sample<br>%) | MEDIAN | basins     | halfbasins | 26  | 27  | -2.0266  | 4.27E-02 | 6.40E-02 | ns   |
|            |                                            |        | basins     | Landcover  | 26  | 27  | 3.7678   | 1.65E-04 | 3.29E-04 | ***  |
|            |                                            |        | basins     | SLIC       | 26  | 27  | -1.5445  | 1.22E-01 | 1.47E-01 | ns   |
|            |                                            |        | halfbasins | Landcover  | 27  | 27  | 5.8499   | 4.92E-09 | 2.95E-08 | **** |
|            |                                            |        | halfbasins | SLIC       | 27  | 27  | 0.4868   | 6.26E-01 | 6.26E-01 | ns   |
|            |                                            |        | Landcover  | SLIC       | 27  | 27  | -5.3631  | 8.18E-08 | 2.45E-07 | **** |

311

312 This table presents pairwise comparisons of sampling efficiency (subsample performance divided by sample proportion) among tessellation strategies. Dunn’s test with Benjamini-Hochberg adjustment was used

313 following a significant Kruskal-Wallis result. Basins consistently outperformed SLIC and Halfbasins in efficiency, while Landcover showed the highest values but also the greatest variability. Only the comparison

314 between Halfbasins and SLIC was not statistically significant.

### **SUPPLEMENTARY INFORMATION S7: Detailed methods for the development of the specific objective 3: Multivariate structure of stratified sub sampling strategies evaluation**

To evaluate the multivariate structure and the influence of multiple variables in shaping the effectiveness of different stratified sampling designs, we applied a Factorial Analysis of Mixed Data (FAMD) using the FactoMineR package in R (Lê et al. 2008). FAMD was selected because our dataset includes both categorical variables (Locality, Index, Subsample, Frequency Range, with Subsample treated as a supplementary variable) and continuous variables (e.g., Sample percent, Subsample performance), which it integrates simultaneously within a unified ordination framework. FAMD combines the principles of Principal Component Analysis (PCA) for continuous data and Multiple Correspondence Analysis (MCA) for categorical data, allowing for the identification of underlying dimensions that best explain the global variance structure. Each resulting dimension captures a proportion of the total variance and is associated with the contribution of specific variables (Kassambara 2017).

We observed that Dimension 1 was largely driven by variables related to sampling performance (Sample percent, Subsample performance), and thus reflects outcome effectiveness rather than structural differences between sampling strategies (Supplementary information S3). Consequently, although we analyzed Dim 1 too, our comparative analysis of sampling strategies focused on subsequent dimensions (e.g., Dim 2 to Dim 4), which were more strongly influenced by design-related and landscape-related variables (e.g., Index, Locality, Time\_Period). To statistically assess differences in the latent FAMD dimensions across sub sampling strategies (Basins, Halfbasins, SLIC, Landcover), we performed Kruskal-Wallis tests independently on each relevant dimension. When a significant effect was detected ( $p < 0.05$ ), we followed up with post-hoc pairwise comparisons using Dunn's test with Benjamini-Hochberg correction to adjust for multiple testing, as implemented in the rstatix package in R (Chen and Sarkar 2020; Ogle et al. 2025). Significance groupings were also extracted and visualized to facilitate interpretation of strategy-specific contrasts, to provide a clear overview of which sub sampling strategies differed structurally across FAMD dimensions for both mean and median statistics.

343 **Table S7-1** Coordinates of continuous variables in FAMD space.

| Frequency range | Dim.1           | Dim.2            | Dim.3            | Dim.4            | Dim.5            | Variable              |
|-----------------|-----------------|------------------|------------------|------------------|------------------|-----------------------|
| Audible         | 0.85186137<br>5 | 0.145319259      | -0.14975512<br>9 | -0.04142774<br>1 | -0.01517612<br>6 | Sample_percent        |
| Audible         | 0.75662575<br>6 | 0.027853896      | 0.309265451      | 0.076822303      | 0.036161759      | Subsample_performance |
| Ultrasound      | 0.95174460<br>9 | -0.00607177<br>1 | 0.025013897      | -0.01499731<br>7 | -1.55534E-2<br>3 | Sample_percent        |
| Ultrasound      | 0.92327655<br>7 | 0.007009913      | -0.00378703<br>8 | 0.020140896      | 3.3756E-16       | Subsample_performance |

344 Numeric variables (Sample percent and Subsample performance) and their loading values across the first five FAMD dimensions.

345  
346  
347 **Table S7-2** Coordinates of categorical variable categories in FAMD space.

| Categoria | Dim.1            | Dim.2            | Dim.3            | Dim.4            | Dim.5            | Categoria   |
|-----------|------------------|------------------|------------------|------------------|------------------|-------------|
| Audible   | -0.4069352<br>76 | -0.0201889<br>46 | -0.2795732<br>64 | 0.7893254<br>07  | 0.2791168        | AndeanRural |
| Audible   | 1.2075300<br>75  | 0.2488933<br>75  | -0.3961750<br>78 | -0.2479037<br>4  | -0.1766759<br>8  | AndeanUrban |
| Audible   | -0.8437067<br>85 | -0.2404121<br>78 | 0.7081939<br>97  | -0.5638396<br>92 | -0.1058611<br>35 | Plains      |
| Audible   | -0.2797596<br>93 | 1.5058891<br>24  | 0.0034196<br>48  | 0.0089745<br>48  | 0.0058273<br>82  | R0-2        |
| Audible   | 0.2353347<br>56  | -0.7977920<br>58 | 0.0936752<br>38  | -0.4876170<br>78 | 1.0893354<br>01  | R0-24       |
| Audible   | 0.0434480<br>51  | -0.8072040<br>02 | -0.2139121<br>79 | -0.1190796<br>86 | -0.1894198<br>71 | R12-24      |
| Audible   | 0.1700939<br>91  | -0.8024500<br>62 | 0.1165547<br>94  | 0.5833237<br>99  | -0.8888125<br>78 | R2-12       |
| Audible   | 0.1248877<br>51  | 0.0069176<br>41  | 0.1933295<br>76  | 0.3213229<br>25  | 1.0194083<br>6   | Dawn        |
| Audible   | -0.0853049       | 0.0096312        | -0.3778623       | -0.9638335       | -0.4524623       | Evening     |

| Categori<br>a  | Dim.1            | Dim.2            | Dim.3            | Dim.4            | Dim.5            | Categoria       |
|----------------|------------------|------------------|------------------|------------------|------------------|-----------------|
|                | 18               | 39               | 85               | 67               | 16               |                 |
| Audible        | -0.0405980<br>84 | -0.0166937<br>36 | 0.1844785<br>07  | 0.6444932<br>82  | -0.5767383<br>55 | Full            |
| Audible        | 0.2763580<br>92  | -0.3693062<br>34 | 0.8379688<br>04  | 0.2639201<br>95  | -0.2151301<br>52 | ACIf            |
| Audible        | 0.1228994<br>31  | -0.3876972<br>35 | 0.4207510<br>64  | -0.4262832<br>14 | 0.0934080<br>64  | ACIf            |
| Audible        | -0.4809168<br>04 | 2.6128449<br>44  | -0.0213390<br>35 | -0.0952402<br>23 | -0.0380274<br>96 | BI              |
| Audible        | -0.4324067<br>1  | 2.6151751<br>35  | 0.1017444<br>18  | 0.0760840<br>87  | 0.0750430<br>22  | NDSI            |
| Audible        | -0.1756609<br>23 | -0.6051010<br>19 | -1.3492152<br>71 | 0.1791723<br>11  | 0.1174391<br>6   | NP              |
| Ultrasou<br>nd | -0.3604525<br>84 | -0.0100902<br>39 | -1.1701623<br>97 | 0.1489310<br>84  | -0.0099818<br>31 | AndeanRur<br>al |
| Ultrasou<br>nd | 1.2726760<br>49  | -0.0494045<br>42 | 0.3102220<br>81  | -0.1842240<br>72 | 0.0099818<br>31  | AndeanUr<br>ban |
| Ultrasou<br>nd | -0.9382869<br>93 | 0.0611946<br>32  | 0.8845100<br>39  | 0.0363013<br>6   | 1.48512E-<br>14  | Plains          |
| Ultrasou<br>nd | 0.0730104<br>78  | -0.4771186<br>92 | 0.3406504<br>88  | 1.2207590<br>83  | -0.0925464<br>13 | Dawn            |
| Ultrasou<br>nd | 0.1130746<br>64  | 1.0032857<br>31  | -0.5588831<br>95 | -0.0354030<br>43 | 1.08235E-<br>15  | Evening         |
| Ultrasou<br>nd | -0.1829441<br>79 | -0.4982979<br>91 | 0.2027081<br>74  | -1.1863394<br>58 | 0.0925464<br>13  | Full            |
| Ultrasou<br>nd | -0.0203644<br>03 | 0.5147117<br>47  | 0.2419044<br>47  | -0.0881855<br>05 | -1.2155026<br>27 | ACIf            |
| Ultrasou<br>nd | -0.0142878<br>46 | 0.5166471<br>57  | 0.2402500<br>85  | 0.0978230<br>06  | 1.2155026<br>27  | ACIf            |
| Ultrasou<br>nd | 0.0356423<br>14  | -1.0608263<br>01 | -0.4959303<br>76 | -0.0099128<br>58 | -1.59346E-<br>14 | NP              |

Individual category coordinates (e.g., Locality, Index, Frequency Range) showing their location along FAMD dimensions 1 to 5.

**Table S7-3** Explained variance per FAMD dimension

| Dimension  | Dimension | Dimension   | Variance (%) | Cumm. variance (%) |
|------------|-----------|-------------|--------------|--------------------|
| Audible    | Dim.1     | 1.798800207 | 13.83692467  | 13.83692467        |
| Audible    | Dim.2     | 1.572358413 | 12.09506472  | 25.93198939        |
| Audible    | Dim.3     | 1.100659781 | 8.466613701  | 34.39860309        |
| Audible    | Dim.4     | 1.017269671 | 7.825151318  | 42.22375441        |
| Audible    | Dim.5     | 1.012287109 | 7.786823916  | 50.01057832        |
| Ultrasound | Dim.1     | 2.170393004 | 27.12991255  | 27.12991255        |
| Ultrasound | Dim.2     | 1.019117891 | 12.73897363  | 39.86888618        |
| Ultrasound | Dim.3     | 1.01204083  | 12.65051037  | 52.51939655        |
| Ultrasound | Dim.4     | 1.000566314 | 12.50707892  | 65.02647548        |
| Ultrasound | Dim.5     | 1           | 12.5         | 77.52647548        |

Proportion of variance (%) captured by each FAMD dimension and the cumulative variance explained across dimensions 1 to 5.

356 **Figure S7-1 FAMD SUMMARY PLOT FOR AUDIBLE FREQUENCYBANDS**  
 FAMD – MEDIAN

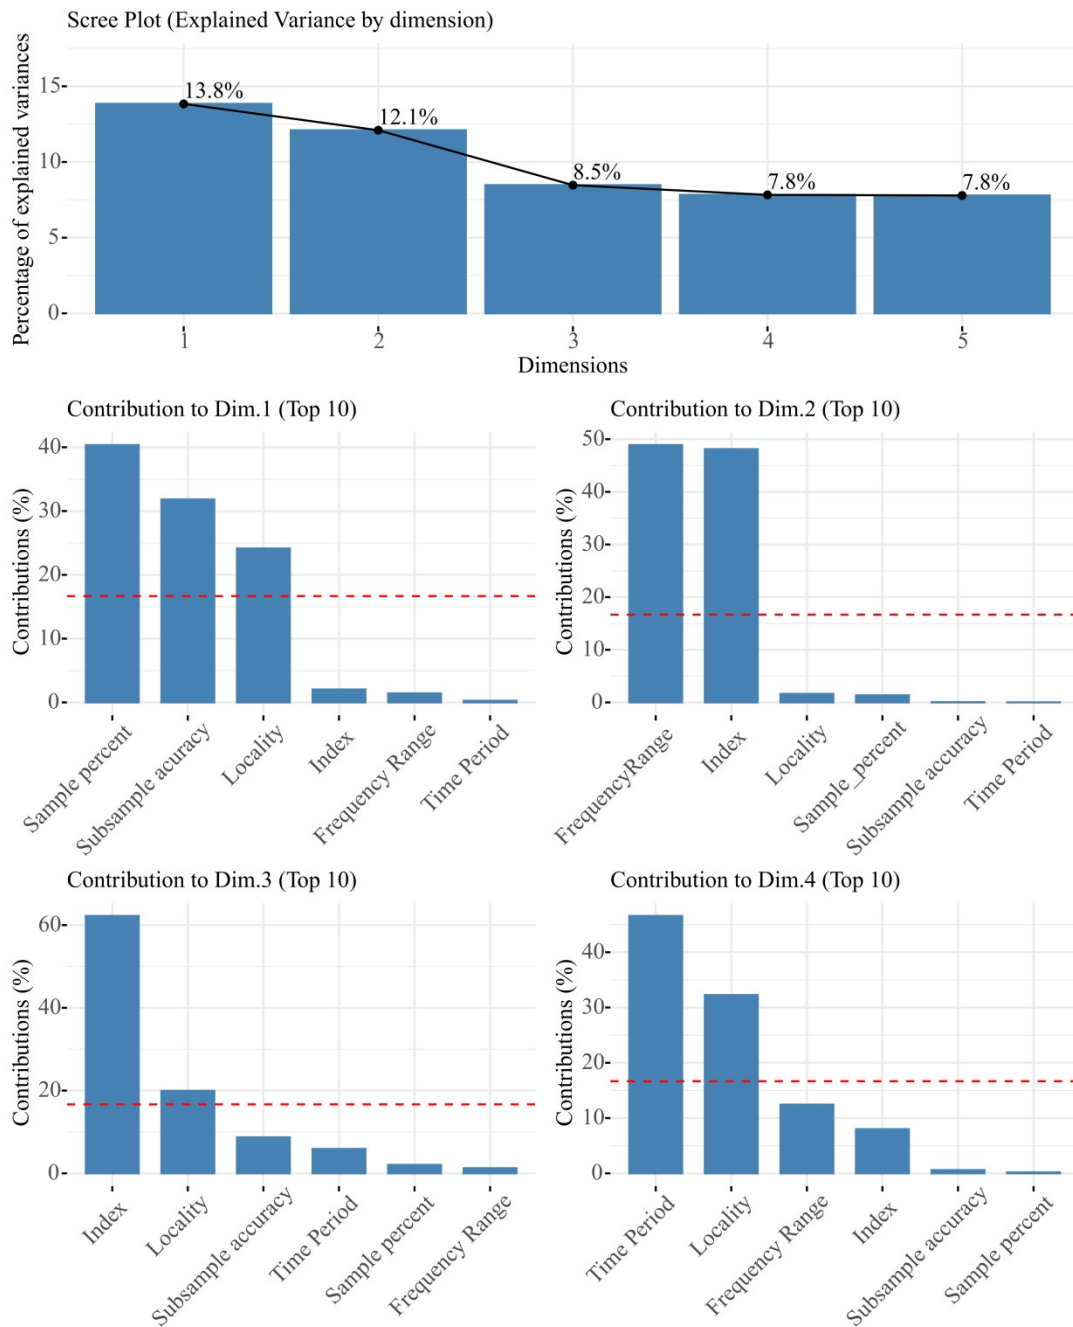

357 Upper panel: Scree plot of variance explained by each FAMD dimension (Dim.1-Dim.5) for audible bands. Middle & inferior  
 358 panels: Variable contributions to dimensions 1 to 4, showing the top contributing continuous and categorical variables.  
 359 Dimension 1 is predominantly associated with performance-related variables (e.g., Sample percent, Subsample performance),  
 360 while Dimensions 2-4 are shaped by landscape, acoustic, and temporal factors. The dashed red line indicates the expected  
 361 average contribution (threshold for relevance).  
 362

363  
 364  
 365  
 366  
 367  
 368

369 **Figure S7-2** FAMD SUMMARY PLOT FOR ULTRASOUND FREQUENCY BANDS  
FAMD – ULTRASOUND - MEDIAN

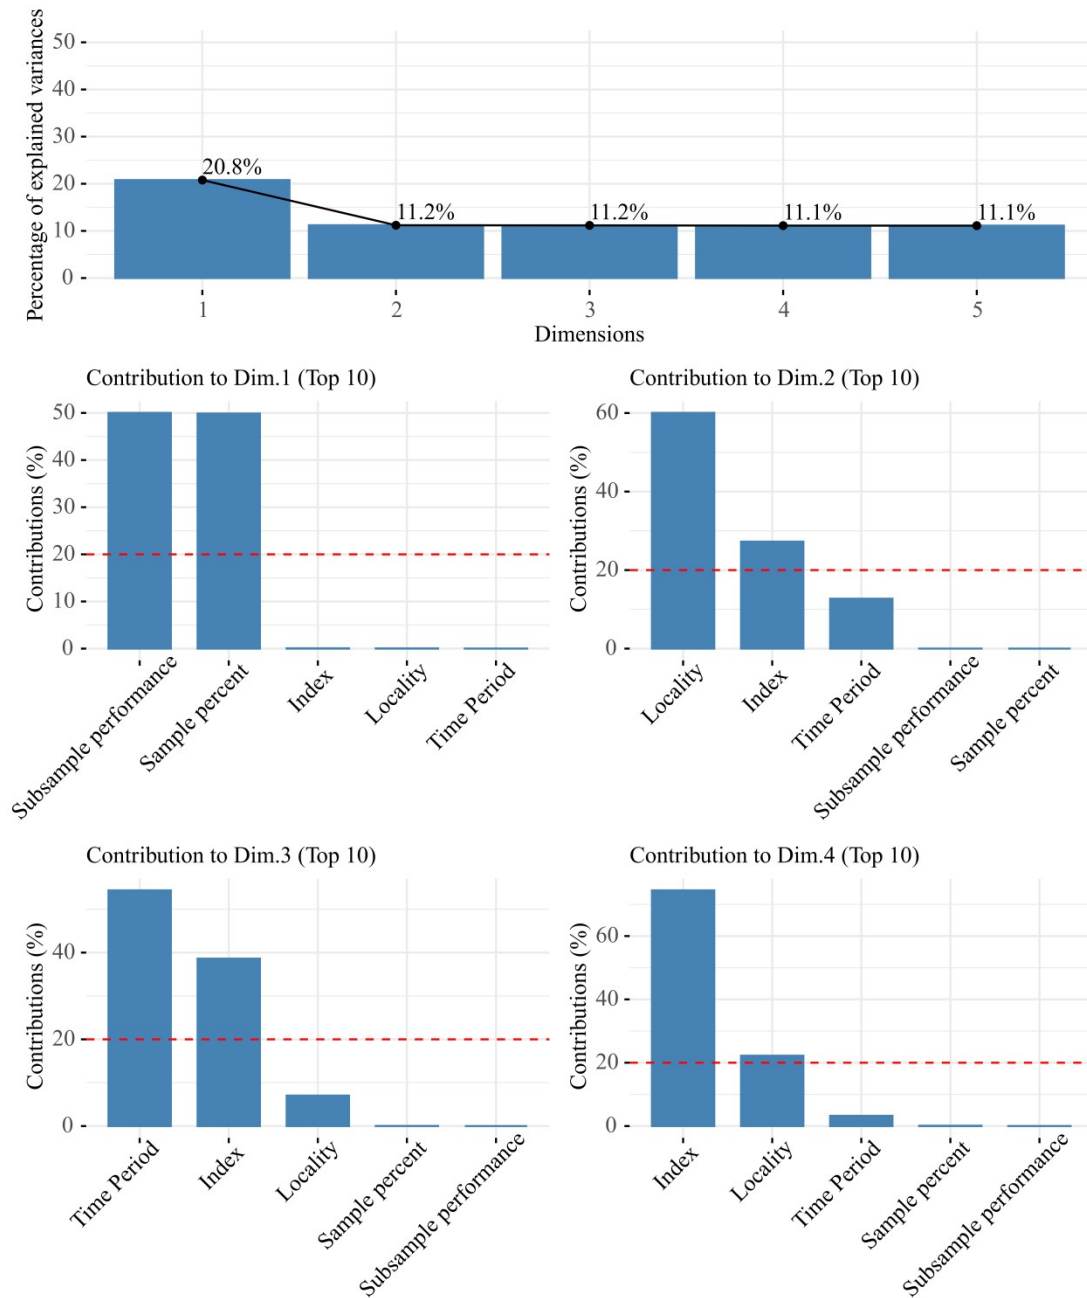

370 Upper panel: Scree plot of variance explained by each FAMD dimension (Dim.1-Dim.5) for ultrasound bands (24-96  
371 kHz) .Middle & inferior panels: Variable contributions to dimensions 1 to 4, showing the top contributing continuous and  
372 categorical variables. Dimension 1 is predominantly associated with performance-related variables (e.g., Sample percent,  
373 Subsample performance), while Dimensions 2-4 are shaped by landscape, acoustic, and temporal factors. The dashed red line  
374 indicates the expected average contribution (threshold for relevance).  
375

376  
377

378 **Table S7-4** Statistical comparison of stratified sub sampling strategies: Dunn's Post-Hoc Test Across FAMD Dimensions for audible frequencies.

| Comparisons (Audible frequencies) |            |            |     |     |              |             |             |              |
|-----------------------------------|------------|------------|-----|-----|--------------|-------------|-------------|--------------|
| .y.                               | group1     | group2     | n1  | n2  | statistic    | p           | p.adj       | p.adj.signif |
| Dim.1                             | basins     | halfbasins | 123 | 125 | 5.655714108  | 1.55E-08    | 2.33E-08    | ****         |
| Dim.1                             | basins     | Landcover  | 123 | 118 | -10.38615614 | 2.87E-25    | 5.73E-25    | ****         |
| Dim.1                             | basins     | SLIC       | 123 | 123 | 2.97025992   | 0.002975479 | 0.003570575 | **           |
| Dim.1                             | halfbasins | Landcover  | 125 | 118 | -16.02334867 | 8.78E-58    | 5.27E-57    | ****         |
| Dim.1                             | halfbasins | SLIC       | 125 | 123 | -2.673501384 | 0.007506397 | 0.007506397 | **           |
| Dim.1                             | Landcover  | SLIC       | 118 | 123 | 13.32544274  | 1.65E-40    | 4.94E-40    | ****         |
| Dim.2                             | basins     | halfbasins | 123 | 125 | 2.694278568  | 0.007054118 | 0.013372203 | *            |
| Dim.2                             | basins     | Landcover  | 123 | 118 | -2.615304186 | 0.008914802 | 0.013372203 | *            |
| Dim.2                             | basins     | SLIC       | 123 | 123 | 1.58597351   | 0.112745319 | 0.135294382 | ns           |
| Dim.2                             | halfbasins | Landcover  | 125 | 118 | -5.291569068 | 1.21E-07    | 7.28E-07    | ****         |
| Dim.2                             | halfbasins | SLIC       | 125 | 123 | -1.101922845 | 0.270495216 | 0.270495216 | ns           |
| Dim.2                             | Landcover  | SLIC       | 118 | 123 | 4.18473946   | 2.85E-05    | 8.56E-05    | ****         |
| Dim.3                             | basins     | halfbasins | 123 | 125 | -7.061336111 | 1.65E-12    | 9.89E-12    | ****         |
| Dim.3                             | basins     | Landcover  | 123 | 118 | -5.806997543 | 6.36E-09    | 1.91E-08    | ****         |
| Dim.3                             | basins     | SLIC       | 123 | 123 | -5.182501206 | 2.19E-07    | 4.38E-07    | ****         |
| Dim.3                             | halfbasins | Landcover  | 125 | 118 | 1.15723917   | 0.247174659 | 0.29660959  | ns           |
| Dim.3                             | halfbasins | SLIC       | 125 | 123 | 1.857979685  | 0.063171899 | 0.094757849 | ns           |
| Dim.3                             | Landcover  | SLIC       | 118 | 123 | 0.678538494  | 0.497430326 | 0.497430326 | ns           |
| Dim.4                             | basins     | halfbasins | 123 | 125 | -11.2371515  | 2.68E-29    | 1.61E-28    | ****         |
| Dim.4                             | basins     | Landcover  | 123 | 118 | -6.367047969 | 1.93E-10    | 5.78E-10    | ****         |
| Dim.4                             | basins     | SLIC       | 123 | 123 | -6.222972021 | 4.88E-10    | 9.76E-10    | ****         |
| Dim.4                             | halfbasins | Landcover  | 125 | 118 | 4.726907166  | 2.28E-06    | 2.74E-06    | ****         |
| Dim.4                             | halfbasins | SLIC       | 125 | 123 | 4.989137241  | 6.06E-07    | 9.10E-07    | ****         |



|       |           |      |     |     |            |             |             |    |
|-------|-----------|------|-----|-----|------------|-------------|-------------|----|
| Dim.4 | Landcover | SLIC | 118 | 123 | 0.20896794 | 0.834473266 | 0.834473266 | ns |
|-------|-----------|------|-----|-----|------------|-------------|-------------|----|

Pairwise comparisons of sub sampling strategies (basins, halfbasins, Landcover, and SLIC) were performed for each FAMD dimension using Dunn's test with Benjamini-Hochberg correction. Reported values include test statistics, adjusted p-values, and significance levels. Significant differences ( $p_{adj} < 0.05$ ) indicate structural dissimilarities between strategies in the multivariate space.

**Table S7-5** Statistical comparison of stratified sub sampling strategies: Dunn's Post-Hoc Test Across FAMD Dimensions for ultrasonic frequencies.

| Comparisons (Ultrasonic frequencies) |            |            |    |    |              |             |             |              |
|--------------------------------------|------------|------------|----|----|--------------|-------------|-------------|--------------|
| Dimension                            | group1     | group2     | n1 | n2 | statistic    | p           | p.adj       | p.adj.signif |
| Dim.1                                | basins     | halfbasins | 26 | 27 | 2.756707132  | 0.005838662 | 0.008757993 | **           |
| Dim.1                                | basins     | Landcover  | 26 | 27 | -4.849004576 | 1.24083E-06 | 2.48165E-06 | ****         |
| Dim.1                                | basins     | SLIC       | 26 | 27 | 1.46664638   | 0.142472276 | 0.170966732 | ns           |
| Dim.1                                | halfbasins | Landcover  | 27 | 27 | -7.678495297 | 1.60968E-14 | 9.65808E-14 | ****         |
| Dim.1                                | halfbasins | SLIC       | 27 | 27 | -1.302406113 | 0.192777594 | 0.192777594 | ns           |
| Dim.1                                | Landcover  | SLIC       | 27 | 27 | 6.376089184  | 1.81667E-10 | 5.45001E-10 | ****         |
| Dim.2                                | basins     | halfbasins | 26 | 27 | -6.781923885 | 1.18586E-11 | 7.11516E-11 | ****         |
| Dim.2                                | basins     | Landcover  | 26 | 27 | -5.357210327 | 8.45167E-08 | 1.69033E-07 | ****         |
| Dim.2                                | basins     | SLIC       | 26 | 27 | -6.612521968 | 3.77827E-11 | 1.13348E-10 | ****         |
| Dim.2                                | halfbasins | Landcover  | 27 | 27 | 1.438347491  | 0.150335483 | 0.225503225 | ns           |
| Dim.2                                | halfbasins | SLIC       | 27 | 27 | 0.171023025  | 0.864205661 | 0.864205661 | ns           |
| Dim.2                                | Landcover  | SLIC       | 27 | 27 | -1.267324467 | 0.205039296 | 0.246047155 | ns           |
| Dim.4                                | basins     | halfbasins | 26 | 27 | 2.212248703  | 0.026949485 | 0.053898971 | ns           |
| Dim.4                                | basins     | Landcover  | 26 | 27 | -0.558992913 | 0.57616655  | 0.63578359  | ns           |

|       |            |           |    |    |              |             |             |    |
|-------|------------|-----------|----|----|--------------|-------------|-------------|----|
|       |            |           |    |    |              | 7           |             |    |
| Dim.4 | basins     | SLIC      | 26 | 27 | 1.743135702  | 0.081309914 | 0.12196487  | ns |
| Dim.4 | halfbasins | Landcover | 27 | 27 | -2.797761279 | 0.005145813 | 0.030874878 | *  |
| Dim.4 | halfbasins | SLIC      | 27 | 27 | -0.473602223 | 0.63578359  | 0.63578359  | ns |
| Dim.4 | Landcover  | SLIC      | 27 | 27 | 2.324159056  | 0.020116971 | 0.053898971 | ns |

**Table S7-6** Significance Groupings of sub sampling Strategies and Kruskal-Wallis Test results Across FAMD Dimensions

| Frequency  | Dimension | KW_Statistic | KW_df | KW_n | KW_p_value | Basins | Halfbasins | Landcover | SLIC |
|------------|-----------|--------------|-------|------|------------|--------|------------|-----------|------|
| Audible    | Dim.1     | 292.549      | 3     | 489  | <0.001     | a      | b          | c         | d    |
| Audible    | Dim.2     | 31.479       | 3     | 489  | <0.001     | a      | b          | c         | ab   |
| Audible    | Dim.3     | 58.062       | 3     | 489  | <0.001     | a      | b          | b         | b    |
| Audible    | Dim.4     | 127.25       | 3     | 489  | <0.001     | a      | b          | c         | c    |
| Ultrasound | Dim.1     | 67.605       | 3     | 107  | <0.001     | a      | b          | c         | ab   |
| Ultrasound | Dim.2     | 60.526       | 3     | 107  | <0.001     | a      | b          | b         | b    |
| Ultrasound | Dim.3     | 3.935        | 3     | 107  | 0.269      | a      | a          | a         | a    |
| Ultrasound | Dim.4     | 10.874       | 3     | 107  | 0.0124     | ab     | a          | b         | ab   |

Letter-based groupings resulting from post-hoc Dunn tests (adjusted with Benjamini-Hochberg correction) for each FAMD dimension. sub sampling strategies sharing the same letter are not significantly different at  $p < 0.05$ . Distinct letters denote statistically significant structural differences in multivariate space. Summary statistics for Kruskal-Wallis tests evaluating differences among sub sampling strategies across the first four FAMD dimensions. Most of the tests were significant ( $p < 0.001$ ), indicating structural differences in multivariate space depending on the sampling strategy used

390 **Figure S7-3** Kruskal-Wallis + Dunn Tests of each FAMD dimension graphic showing differences in FAMD dimensions across stratified sub sampling strategies for audible  
 391 frequencies.  
 392

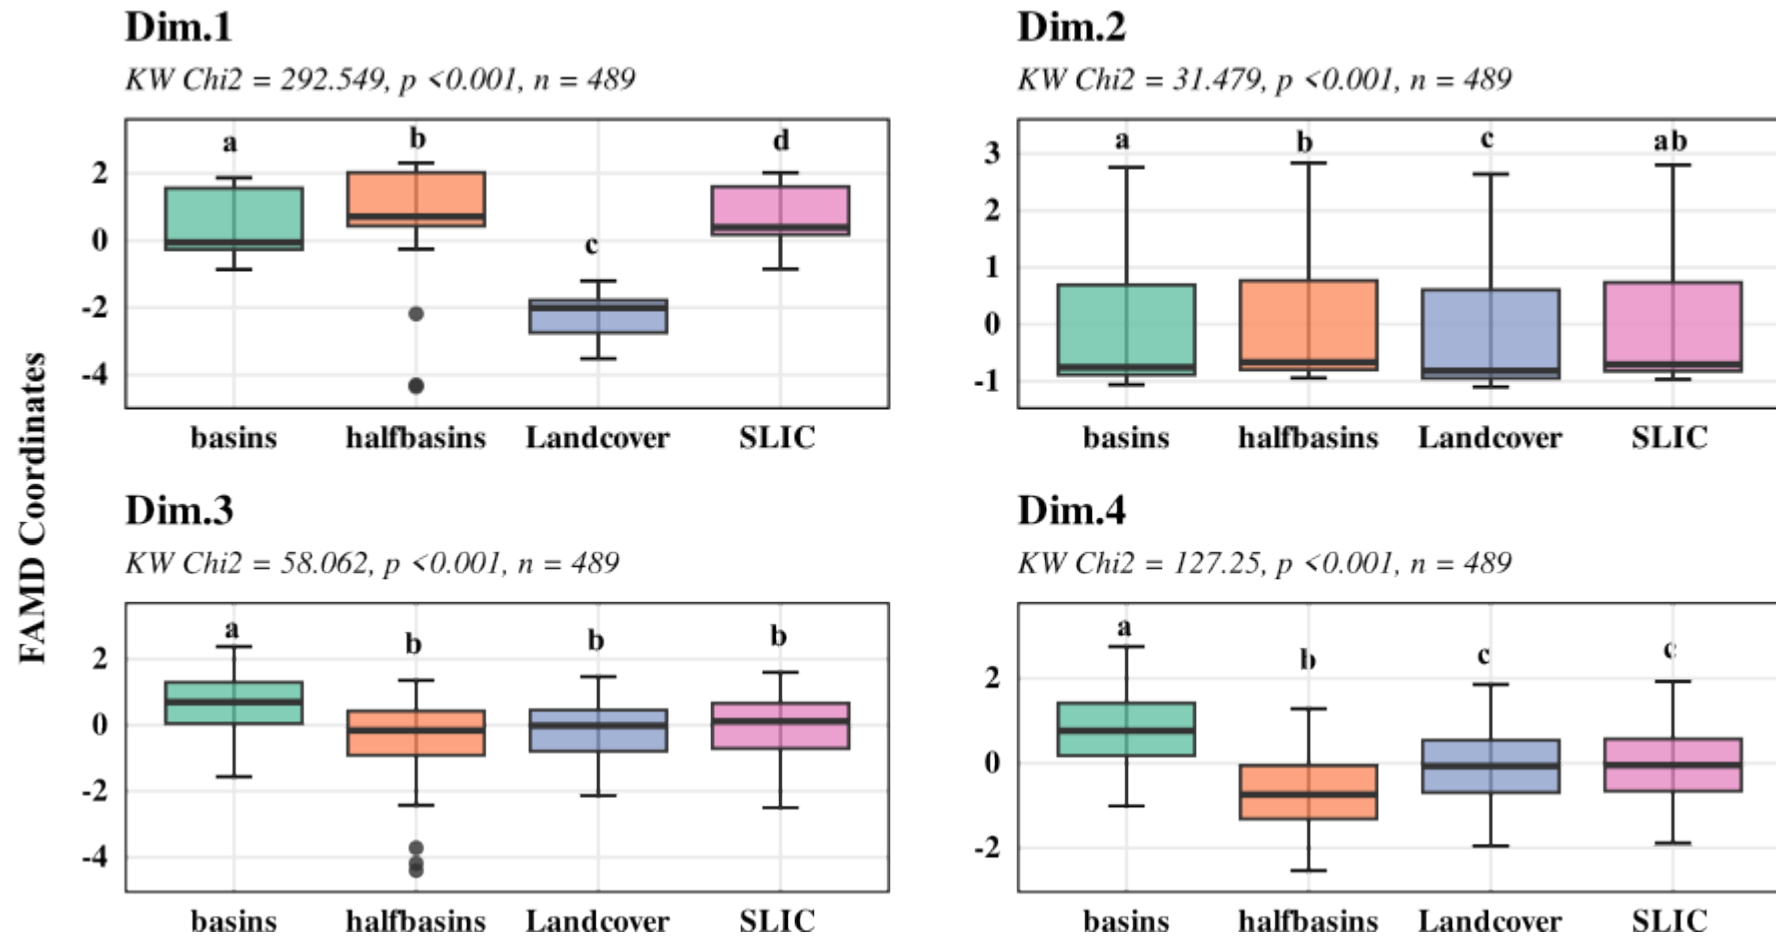

393

394 Boxplots show the distribution of FAMD coordinates for each strategy (Basins, Halfbasins, Landcover, and SLIC) across dimensions 1 to 4, based on the median statistic.  
395 Kruskal-Wallis tests indicate significant differences across strategies in all dimensions ( $p < 0.0001$ ). Letters denote significance groupings from Dunn's post-hoc tests with  
396 Benjamini-Hochberg correction. Dimension 1 primarily reflects performance variables, while Dimensions 2-4 capture structural variation linked to acoustic index, locality,  
397 and temporal stratification.

398

399

400

401

402

403

404

405

406

407

408

409

410

411

412 **Figure S7-3** Kruskal-Wallis + Dunn Tests of each FAMD dimension graphic showing differences in FAMD dimensions across stratified sub sampling strategies for ultrasonic  
413 frequencies.

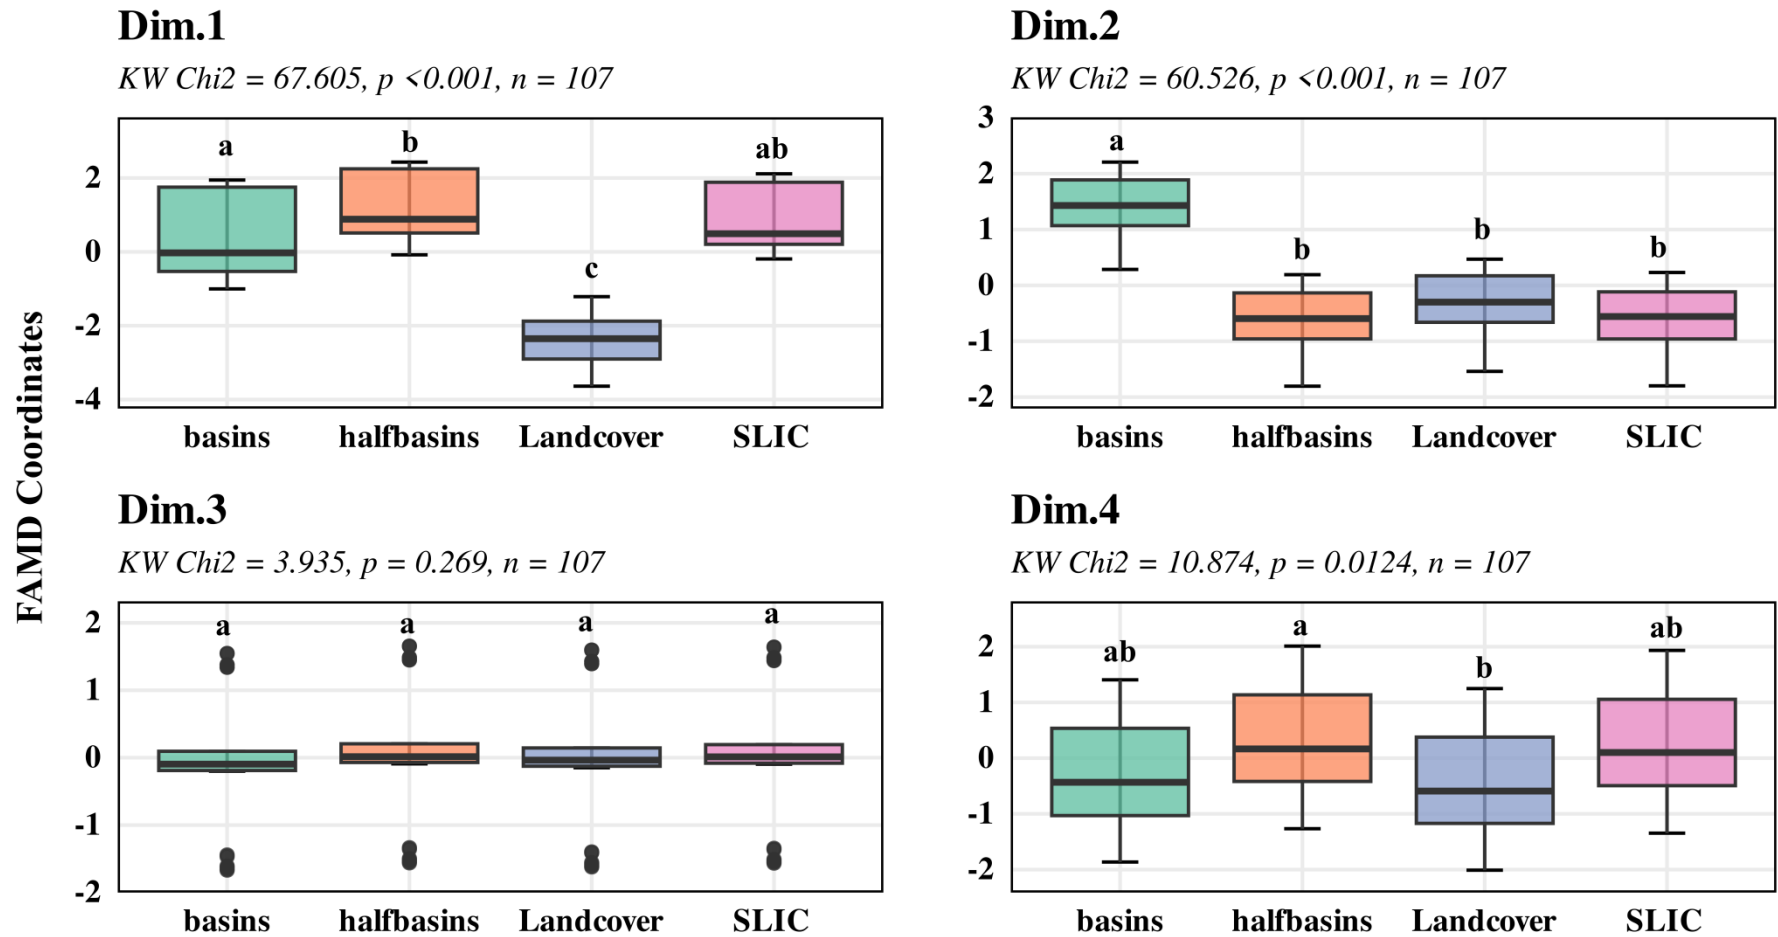

414

415 Boxplots show the distribution of FAMD coordinates for each strategy (Basins, Halfbasins, Landcover, and SLIC) across dimensions 1 to 4, based on the median statistic.  
416 Kruskal-Wallis tests indicate significant differences across strategies in most of dimensions ( $p < 0.0001$ ). Letters denote significance groupings from Dunn's post-hoc tests  
417 with Benjamini-Hochberg correction. Dimension 1 primarily reflects performance variables, while Dimensions 2-4 capture structural variation linked to acoustic index,  
418 locality, and temporal stratification.

419

420

421

422
