# Supplementary material for: A workflow to optimize spatial sampling in ecoacoustic studies
Source: Research Square preprint supplement (doi:10.21203/rs.3.rs-7207339/v2), 2026-01-13
Supplement: Supplementary file 21 [file DF1-2_Interpolations_variograms_and_error_for_complete_scenarios_ULTRASOUND.xlsx]

## Sheet: Sheet1
GeoJSON	Variable	Num_Points	Sill	Nugget	Range	Empiric_RMSE	Empiric_RMSE_Relative	Calculate_NDSI_BI	source_csv	RMSE_theoretical	RMSE_Relative_theoretical
AndeanUrban_R24-96_Dawn_complete	mean_ACItf	54	7.70532e+10	3528.38	200	1.07264e+10	17841.8	TRUE	US_AndeanUrban_complete_Empirical_variogram_parameters.csv	260864	0.433906
AndeanUrban_R24-96_Dawn_complete	mean_ACIft	54	6.83217e+10	2096.91	200	1.09317e+10	18491.5	TRUE	US_AndeanUrban_complete_Empirical_variogram_parameters.csv	257941	0.43632
AndeanUrban_R24-96_Dawn_complete	mean_BI	54	138.449	0.0273066	200	26.1416	0.25091	TRUE	US_AndeanUrban_complete_Empirical_variogram_parameters.csv	12.1651	0.116762
AndeanUrban_R24-96_Dawn_complete	mean_NP	54	39.2303	1230.36	200	11.692	1.49639	TRUE	US_AndeanUrban_complete_Empirical_variogram_parameters.csv	7.47729	0.956974
AndeanUrban_R24-96_Dawn_complete	median_ACItf	54	1.58301e+11	3528.38	200	2.56809e+10	39882.4	TRUE	US_AndeanUrban_complete_Empirical_variogram_parameters.csv	363234	0.564101
AndeanUrban_R24-96_Dawn_complete	median_ACIft	54	1.54126e+11	3528.38	200	2.46415e+10	38931.7	TRUE	US_AndeanUrban_complete_Empirical_variogram_parameters.csv	358963	0.567133
AndeanUrban_R24-96_Dawn_complete	median_BI	54	125.665	56.4704	200	18.985	0.187137	TRUE	US_AndeanUrban_complete_Empirical_variogram_parameters.csv	12.1613	0.119875
AndeanUrban_R24-96_Dawn_complete	median_NP	54	24.9171	1313.43	200	10.0752	1.73821	TRUE	US_AndeanUrban_complete_Empirical_variogram_parameters.csv	7.10147	1.22517
AndeanUrban_R24-96_Full_complete	mean_ACItf	54	4.75333e+10	0.0139397	200	1.11734e+10	20057.2	TRUE	US_AndeanUrban_complete_Empirical_variogram_parameters.csv	213801	0.383792
AndeanUrban_R24-96_Full_complete	mean_ACIft	54	4.65437e+10	6.9877e-06	200	1.10469e+10	20225.8	TRUE	US_AndeanUrban_complete_Empirical_variogram_parameters.csv	212025	0.388197
AndeanUrban_R24-96_Full_complete	mean_BI	54	187.268	0.0275705	200	46.4451	0.420362	TRUE	US_AndeanUrban_complete_Empirical_variogram_parameters.csv	14.3996	0.130327
AndeanUrban_R24-96_Full_complete	mean_NP	54	49.8736	1273.02	200	10.1708	0.910896	TRUE	US_AndeanUrban_complete_Empirical_variogram_parameters.csv	8.70173	0.779328
AndeanUrban_R24-96_Full_complete	median_ACItf	54	1.058e+11	1513.71	200	2.34882e+10	44127.8	TRUE	US_AndeanUrban_complete_Empirical_variogram_parameters.csv	319080	0.599463
AndeanUrban_R24-96_Full_complete	median_ACIft	54	1.07743e+11	3528.38	200	2.30119e+10	44207.4	TRUE	US_AndeanUrban_complete_Empirical_variogram_parameters.csv	317151	0.609267
AndeanUrban_R24-96_Full_complete	median_BI	54	171.893	149.801	200	29.1454	0.27646	TRUE	US_AndeanUrban_complete_Empirical_variogram_parameters.csv	15.3873	0.145957
AndeanUrban_R24-96_Full_complete	median_NP	54	34.7987	1160.77	200	8.76126	1.20691	TRUE	US_AndeanUrban_complete_Empirical_variogram_parameters.csv	8.83467	1.21702
AndeanUrban_R24-96_Evening_complete	mean_ACItf	54	4.81118e+10	3528.38	200	1.00273e+10	26949.8	TRUE	US_AndeanUrban_complete_Empirical_variogram_parameters.csv	220426	0.592428
AndeanUrban_R24-96_Evening_complete	mean_ACIft	54	4.66153e+10	3528.38	200	9.56333e+09	26236.8	TRUE	US_AndeanUrban_complete_Empirical_variogram_parameters.csv	217523	0.59677
AndeanUrban_R24-96_Evening_complete	mean_BI	54	191.588	1939.03	200	49.5866	0.434316	TRUE	US_AndeanUrban_complete_Empirical_variogram_parameters.csv	15.8514	0.138838
AndeanUrban_R24-96_Evening_complete	mean_NP	54	62.26	1414.64	200	12.6083	0.992666	TRUE	US_AndeanUrban_complete_Empirical_variogram_parameters.csv	9.20766	0.72493
AndeanUrban_R24-96_Evening_complete	median_ACItf	54	6.37581e+10	3528.38	200	1.36717e+10	45804.8	TRUE	US_AndeanUrban_complete_Empirical_variogram_parameters.csv	283844	0.950976
AndeanUrban_R24-96_Evening_complete	median_ACIft	54	6.11715e+10	3528.38	200	1.28678e+10	44214.1	TRUE	US_AndeanUrban_complete_Empirical_variogram_parameters.csv	280233	0.962892
AndeanUrban_R24-96_Evening_complete	median_BI	54	254.891	3528.38	200	51.251	0.463793	TRUE	US_AndeanUrban_complete_Empirical_variogram_parameters.csv	17.5033	0.158395
AndeanUrban_R24-96_Evening_complete	median_NP	54	58.3323	1631.34	200	14.902	1.61103	TRUE	US_AndeanUrban_complete_Empirical_variogram_parameters.csv	9.42993	1.01945
Plains_R24-96_Full_complete	mean_ACItf	96	3.02712e+10	2031.36	200	2.59115e+09	5759.93	TRUE	US_Plains_complete_Empirical_variogram_parameters.csv	193753	0.430698
Plains_R24-96_Full_complete	mean_ACIft	96	2.99535e+10	2031.36	200	2.41592e+09	5475.12	TRUE	US_Plains_complete_Empirical_variogram_parameters.csv	192997	0.437383
Plains_R24-96_Full_complete	mean_BI	96	500.295	2031.36	200	56.3959	0.476858	TRUE	US_Plains_complete_Empirical_variogram_parameters.csv	22.5007	0.190256
Plains_R24-96_Full_complete	mean_NP	96	91.156	2031.36	200	9.8046	0.582873	TRUE	US_Plains_complete_Empirical_variogram_parameters.csv	9.5614	0.568414
Plains_R24-96_Full_complete	median_ACItf	96	4.20196e+10	1621.69	200	9.07254e+09	21527.7	TRUE	US_Plains_complete_Empirical_variogram_parameters.csv	237642	0.563888
Plains_R24-96_Full_complete	median_ACIft	96	3.5642e+10	142.083	200	4.42876e+09	10735.5	TRUE	US_Plains_complete_Empirical_variogram_parameters.csv	236572	0.573458
Plains_R24-96_Full_complete	median_BI	96	644.303	73.3126	200	74.9118	0.646843	TRUE	US_Plains_complete_Empirical_variogram_parameters.csv	27.3903	0.236508
Plains_R24-96_Full_complete	median_NP	96	99.7376	2031.36	200	11.0986	0.847625	TRUE	US_Plains_complete_Empirical_variogram_parameters.csv	10.4078	0.794865
Plains_R24-96_Dawn_complete	mean_ACItf	91	4.03352e+10	2023.93	200	3.27679e+09	6564.24	TRUE	US_Plains_complete_Empirical_variogram_parameters.csv	201824	0.404305
Plains_R24-96_Dawn_complete	mean_ACIft	91	3.95834e+10	2023.93	200	3.20205e+09	6528.99	TRUE	US_Plains_complete_Empirical_variogram_parameters.csv	200818	0.409469
Plains_R24-96_Dawn_complete	mean_BI	91	531.028	2023.93	200	62.8335	0.555273	TRUE	US_Plains_complete_Empirical_variogram_parameters.csv	23.6842	0.209302
Plains_R24-96_Dawn_complete	mean_NP	91	169.781	2023.93	200	17.4389	0.946217	TRUE	US_Plains_complete_Empirical_variogram_parameters.csv	13.5835	0.737028
Plains_R24-96_Dawn_complete	median_ACItf	91	8.25847e+10	1564.53	200	1.30454e+10	26543.2	TRUE	US_Plains_complete_Empirical_variogram_parameters.csv	267332	0.543933
Plains_R24-96_Dawn_complete	median_ACIft	91	8.15401e+10	1575.13	200	1.29191e+10	26776.5	TRUE	US_Plains_complete_Empirical_variogram_parameters.csv	265495	0.550274
Plains_R24-96_Dawn_complete	median_BI	91	645.428	2023.93	200	68.0284	0.616821	TRUE	US_Plains_complete_Empirical_variogram_parameters.csv	27.6054	0.250301
Plains_R24-96_Dawn_complete	median_NP	91	178.866	2023.93	200	12.0071	0.767848	TRUE	US_Plains_complete_Empirical_variogram_parameters.csv	14.7937	0.946051
Plains_R24-96_Evening_complete	mean_ACItf	91	2.42661e+10	2023.07	200	2.25584e+09	5868.56	TRUE	US_Plains_complete_Empirical_variogram_parameters.csv	194961	0.507189
Plains_R24-96_Evening_complete	mean_ACIft	91	2.37571e+10	2023.07	200	2.10125e+09	5600.46	TRUE	US_Plains_complete_Empirical_variogram_parameters.csv	193952	0.51694
Plains_R24-96_Evening_complete	mean_BI	91	514.022	11.5826	200	36.575	0.293957	TRUE	US_Plains_complete_Empirical_variogram_parameters.csv	25.0034	0.200955
Plains_R24-96_Evening_complete	mean_NP	91	136.459	2023.07	200	13.3862	0.608536	TRUE	US_Plains_complete_Empirical_variogram_parameters.csv	11.3638	0.5166
Plains_R24-96_Evening_complete	median_ACItf	91	3.45027e+10	825.084	200	3.53252e+09	9717.53	TRUE	US_Plains_complete_Empirical_variogram_parameters.csv	246867	0.679102
Plains_R24-96_Evening_complete	median_ACIft	91	3.47484e+10	2023.07	200	3.22973e+09	9134.86	TRUE	US_Plains_complete_Empirical_variogram_parameters.csv	245080	0.693176
Plains_R24-96_Evening_complete	median_BI	91	758.976	2023.07	200	67.9383	0.55658	TRUE	US_Plains_complete_Empirical_variogram_parameters.csv	29.3483	0.240434
Plains_R24-96_Evening_complete	median_NP	91	172.147	2023.07	200	20.0468	1.01489	TRUE	US_Plains_complete_Empirical_variogram_parameters.csv	13.4326	0.680037
AndeanRural_R24-96_Dawn_complete	mean_ACItf	38	3.79379e+10	369.064	200	8.76156e+09	13559.2	TRUE	US_AndeanRural_complete_Empirical_variogram_parameters.csv	200934	0.310962
AndeanRural_R24-96_Dawn_complete	mean_ACIft	38	3.71848e+10	367.385	200	8.28691e+09	13060.2	TRUE	US_AndeanRural_complete_Empirical_variogram_parameters.csv	198558	0.312929
AndeanRural_R24-96_Dawn_complete	mean_BI	38	209.501	1268.81	200	50.8891	0.472082	TRUE	US_AndeanRural_complete_Empirical_variogram_parameters.csv	14.1443	0.131212
AndeanRural_R24-96_Dawn_complete	mean_NP	38	74.0758	1268.81	200	20.582	1.82043	TRUE	US_AndeanRural_complete_Empirical_variogram_parameters.csv	8.4932	0.751204
AndeanRural_R24-96_Dawn_complete	median_ACItf	38	8.23091e+10	12.2558	200	2.16529e+10	31170.9	TRUE	US_AndeanRural_complete_Empirical_variogram_parameters.csv	294655	0.424177
AndeanRural_R24-96_Dawn_complete	median_ACIft	38	8.1121e+10	19.4621	200	2.1175e+10	31079.9	TRUE	US_AndeanRural_complete_Empirical_variogram_parameters.csv	293367	0.430595
AndeanRural_R24-96_Dawn_complete	median_BI	38	221.757	1268.81	200	39.3767	0.380329	TRUE	US_AndeanRural_complete_Empirical_variogram_parameters.csv	14.7126	0.142105
AndeanRural_R24-96_Dawn_complete	median_NP	38	61.284	1268.81	200	14.0222	1.64712	TRUE	US_AndeanRural_complete_Empirical_variogram_parameters.csv	9.38839	1.10281
AndeanRural_R24-96_Full_complete	mean_ACItf	41	2.30009e+10	697.102	200	8.24722e+09	16749.6	TRUE	US_AndeanRural_complete_Empirical_variogram_parameters.csv	151309	0.307299
AndeanRural_R24-96_Full_complete	mean_ACIft	41	2.19546e+10	714.25	200	7.96102e+09	16576.4	TRUE	US_AndeanRural_complete_Empirical_variogram_parameters.csv	149217	0.310699
AndeanRural_R24-96_Full_complete	mean_BI	41	292.771	1277.04	200	59.4273	0.500801	TRUE	US_AndeanRural_complete_Empirical_variogram_parameters.csv	15.2616	0.128612
AndeanRural_R24-96_Full_complete	mean_NP	41	62.7129	970.353	200	15.3957	1.10525	TRUE	US_AndeanRural_complete_Empirical_variogram_parameters.csv	7.34681	0.527424
AndeanRural_R24-96_Full_complete	median_ACItf	41	4.55132e+10	697.14	200	1.73257e+10	38445.7	TRUE	US_AndeanRural_complete_Empirical_variogram_parameters.csv	213287	0.473283
AndeanRural_R24-96_Full_complete	median_ACIft	41	4.52109e+10	738.625	200	1.59165e+10	36420.6	TRUE	US_AndeanRural_complete_Empirical_variogram_parameters.csv	211596	0.484182
AndeanRural_R24-96_Full_complete	median_BI	41	335.426	1077.64	200	85.7901	0.744336	TRUE	US_AndeanRural_complete_Empirical_variogram_parameters.csv	17.3681	0.15069
AndeanRural_R24-96_Full_complete	median_NP	41	54.5655	902.222	200	9.69496	0.919059	TRUE	US_AndeanRural_complete_Empirical_variogram_parameters.csv	7.61869	0.722234
AndeanRural_R24-96_Evening_complete	mean_ACItf	39	3.3888e+10	11.8237	200	1.06816e+10	24913.7	TRUE	US_AndeanRural_complete_Empirical_variogram_parameters.csv	198409	0.462768
AndeanRural_R24-96_Evening_complete	mean_ACIft	39	3.29663e+10	13.9324	200	1.0107e+10	24216.8	TRUE	US_AndeanRural_complete_Empirical_variogram_parameters.csv	196213	0.470136
AndeanRural_R24-96_Evening_complete	mean_BI	39	335.326	641.575	200	78.8463	0.634814	TRUE	US_AndeanRural_complete_Empirical_variogram_parameters.csv	17.9597	0.144599
AndeanRural_R24-96_Evening_complete	mean_NP	39	123.345	701.488	200	31.8542	1.77354	TRUE	US_AndeanRural_complete_Empirical_variogram_parameters.csv	10.272	0.571913
AndeanRural_R24-96_Evening_complete	median_ACItf	39	6.27133e+10	4.69964	200	1.96058e+10	49794.9	TRUE	US_AndeanRural_complete_Empirical_variogram_parameters.csv	265408	0.674083
AndeanRural_R24-96_Evening_complete	median_ACIft	39	6.04642e+10	32.6978	200	1.81522e+10	47514.9	TRUE	US_AndeanRural_complete_Empirical_variogram_parameters.csv	261627	0.684831
AndeanRural_R24-96_Evening_complete	median_BI	39	374.067	710.611	200	86.8307	0.70684	TRUE	US_AndeanRural_complete_Empirical_variogram_parameters.csv	19.5427	0.159086
AndeanRural_R24-96_Evening_complete	median_NP	39	115.034	851.595	200	29.8974	1.86262	TRUE	US_AndeanRural_complete_Empirical_variogram_parameters.csv	10.1723	0.633738
