# Supplementary material for: A workflow to optimize spatial sampling in ecoacoustic studies
Source: Research Square preprint supplement (doi:10.21203/rs.3.rs-7207339/v2), 2026-01-13
Supplement: Supplementary file 33 [file Sampling_count_database.xlsx]

## Sheet: DATA
Locality	Index	Num_Points_Total	Frequency_Range	Time_Period	basins	halfbasins	Landcover	SLIC	ssample20	ssample40	ssample60	ssample80
AndeanRural	ACIft	38	R0-2	Dawn	27	28	21	27	7	15	22	30
AndeanRural	ACIft	38	R0-24	Dawn	27	28	21	27	7	15	22	30
AndeanRural	ACIft	38	R12-24	Dawn	27	28	21	27	7	15	22	30
AndeanRural	ACIft	38	R2-12	Dawn	27	28	21	27	7	15	22	30
AndeanRural	ACIft	39	R0-2	Evening	26	28	22	29	7	15	23	31
AndeanRural	ACIft	39	R0-24	Evening	26	28	22	29	7	15	23	31
AndeanRural	ACIft	39	R12-24	Evening	26	28	22	29	7	15	23	31
AndeanRural	ACIft	39	R2-12	Evening	26	28	22	29	7	15	23	31
AndeanRural	ACIft	41	R0-2	Full	27	29	23	29	8	16	24	32
AndeanRural	ACIft	41	R0-24	Full	27	29	23	29	8	16	24	32
AndeanRural	ACIft	41	R12-24	Full	27	29	23	29	8	16	24	32
AndeanRural	ACIft	41	R2-12	Full	27	29	23	29	8	16	24	32
AndeanRural	ACItf	38	R0-2	Dawn	27	28	21	27	7	15	22	30
AndeanRural	ACItf	38	R0-24	Dawn	27	28	21	27	7	15	22	30
AndeanRural	ACItf	38	R12-24	Dawn	27	28	21	27	7	15	22	30
AndeanRural	ACItf	38	R2-12	Dawn	27	28	21	27	7	15	22	30
AndeanRural	ACItf	39	R0-2	Evening	26	28	22	29	7	15	23	31
AndeanRural	ACItf	39	R0-24	Evening	26	28	22	29	7	15	23	31
AndeanRural	ACItf	39	R12-24	Evening	26	28	22	29	7	15	23	31
AndeanRural	ACItf	39	R2-12	Evening	26	28	22	29	7	15	23	31
AndeanRural	ACItf	41	R0-2	Full	27	29	23	29	8	16	24	32
AndeanRural	ACItf	41	R0-24	Full	27	29	23	29	8	16	24	32
AndeanRural	ACItf	41	R12-24	Full	27	29	23	29	8	16	24	32
AndeanRural	ACItf	41	R2-12	Full	27	29	23	29	8	16	24	32
AndeanRural	BI	38	R0-2	Dawn	27	28	21	27	7	15	22	30
AndeanRural	BI	39	R0-2	Evening	26	28	22	29	7	15	23	31
AndeanRural	BI	41	R0-2	Full	27	29	23	29	8	16	24	32
AndeanRural	NDSI	38	R0-2	Dawn	27	28	21	27	7	15	22	30
AndeanRural	NDSI	39	R0-2	Evening	26	28	22	29	7	15	23	31
AndeanRural	NDSI	41	R0-2	Full	27	29	23	29	8	16	24	32
AndeanRural	NP	38	R0-2	Dawn	27	28	21	27	7	15	22	30
AndeanRural	NP	38	R0-24	Dawn	27	28	21	27	7	15	22	30
AndeanRural	NP	38	R12-24	Dawn	27	28	21	27	7	15	22	30
AndeanRural	NP	38	R2-12	Dawn	27	28	21	27	7	15	22	30
AndeanRural	NP	39	R0-2	Evening	26	28	22	29	7	15	23	31
AndeanRural	NP	39	R0-24	Evening	26	28	22	29	7	15	23	31
AndeanRural	NP	39	R12-24	Evening	26	28	22	29	7	15	23	31
AndeanRural	NP	39	R2-12	Evening	26	28	22	29	7	15	23	31
AndeanRural	NP	41	R0-2	Full	27	29	23	29	8	16	24	32
AndeanRural	NP	41	R0-24	Full	27	29	23	29	8	16	24	32
AndeanRural	NP	41	R12-24	Full	27	29	23	29	8	16	24	32
AndeanRural	NP	41	R2-12	Full	27	29	23	29	8	16	24	32
AndeanUrban	ACIft	54	R0-2	Dawn	50	53	23	50	10	21	32	43
AndeanUrban	ACIft	54	R0-2	Evening	50	53	23	50	10	21	32	43
AndeanUrban	ACIft	54	R0-2	Full	50	53	23	50	10	21	32	43
AndeanUrban	ACIft	54	R0-24	Dawn	50	53	23	50	10	21	32	43
AndeanUrban	ACIft	54	R0-24	Evening	50	53	23	50	10	21	32	43
AndeanUrban	ACIft	54	R0-24	Full	50	53	23	50	10	21	32	43
AndeanUrban	ACIft	54	R12-24	Dawn	50	53	23	50	10	21	32	43
AndeanUrban	ACIft	54	R12-24	Evening	50	53	23	50	10	21	32	43
AndeanUrban	ACIft	54	R12-24	Full	50	53	23	50	10	21	32	43
AndeanUrban	ACIft	54	R2-12	Dawn	50	53	23	50	10	21	32	43
AndeanUrban	ACIft	54	R2-12	Evening	50	53	23	50	10	21	32	43
AndeanUrban	ACIft	54	R2-12	Full	50	53	23	50	10	21	32	43
AndeanUrban	ACItf	54	R0-2	Dawn	50	53	23	50	10	21	32	43
AndeanUrban	ACItf	54	R0-2	Evening	50	53	23	50	10	21	32	43
AndeanUrban	ACItf	54	R0-2	Full	50	53	23	50	10	21	32	43
AndeanUrban	ACItf	54	R0-24	Dawn	50	53	23	50	10	21	32	43
AndeanUrban	ACItf	54	R0-24	Evening	50	53	23	50	10	21	32	43
AndeanUrban	ACItf	54	R0-24	Full	50	53	23	50	10	21	32	43
AndeanUrban	ACItf	54	R12-24	Dawn	50	53	23	50	10	21	32	43
AndeanUrban	ACItf	54	R12-24	Evening	50	53	23	50	10	21	32	43
AndeanUrban	ACItf	54	R12-24	Full	50	53	23	50	10	21	32	43
AndeanUrban	ACItf	54	R2-12	Dawn	50	53	23	50	10	21	32	43
AndeanUrban	ACItf	54	R2-12	Evening	50	53	23	50	10	21	32	43
AndeanUrban	ACItf	54	R2-12	Full	50	53	23	50	10	21	32	43
AndeanUrban	BI	54	R0-2	Dawn	50	53	23	50	10	21	32	43
AndeanUrban	BI	54	R0-2	Evening	50	53	23	50	10	21	32	43
AndeanUrban	BI	54	R0-2	Full	50	53	23	50	10	21	32	43
AndeanUrban	NDSI	54	R0-2	Dawn	50	53	23	50	10	21	32	43
AndeanUrban	NDSI	54	R0-2	Evening	50	53	23	50	10	21	32	43
AndeanUrban	NDSI	54	R0-2	Full	50	53	23	50	10	21	32	43
AndeanUrban	NP	54	R0-2	Dawn	50	53	23	50	10	21	32	43
AndeanUrban	NP	54	R0-2	Evening	50	53	23	50	10	21	32	43
AndeanUrban	NP	54	R0-2	Full	50	53	23	50	10	21	32	43
AndeanUrban	NP	54	R0-24	Dawn	50	53	23	50	10	21	32	43
AndeanUrban	NP	54	R0-24	Evening	50	53	23	50	10	21	32	43
AndeanUrban	NP	54	R0-24	Full	50	53	23	50	10	21	32	43
AndeanUrban	NP	54	R12-24	Dawn	50	53	23	50	10	21	32	43
AndeanUrban	NP	54	R12-24	Evening	50	53	23	50	10	21	32	43
AndeanUrban	NP	54	R12-24	Full	50	53	23	50	10	21	32	43
AndeanUrban	NP	54	R2-12	Dawn	50	53	23	50	10	21	32	43
AndeanUrban	NP	54	R2-12	Evening	50	53	23	50	10	21	32	43
AndeanUrban	NP	54	R2-12	Full	50	53	23	50	10	21	32	43
Plains	ACIft	91	R0-2	Dawn	55	72	36	68	18	36	54	72
Plains	ACIft	91	R0-2	Evening	55	72	36	68	18	36	54	72
Plains	ACIft	91	R0-24	Dawn	55	72	36	68	18	36	54	72
Plains	ACIft	91	R0-24	Evening	55	72	36	68	18	36	54	72
Plains	ACIft	91	R12-24	Dawn	55	72	36	68	18	36	54	72
Plains	ACIft	91	R12-24	Evening	55	72	36	68	18	36	54	72
Plains	ACIft	91	R2-12	Dawn	55	72	36	68	18	36	54	72
Plains	ACIft	91	R2-12	Evening	55	72	36	68	18	36	54	72
Plains	ACIft	96	R0-2	Full	55	73	36	69	19	38	57	76
Plains	ACIft	96	R0-24	Full	55	73	36	69	19	38	57	76
Plains	ACIft	96	R12-24	Full	55	73	36	69	19	38	57	76
Plains	ACIft	96	R2-12	Full	55	73	36	69	19	38	57	76
Plains	ACItf	91	R0-2	Dawn	55	72	36	68	18	36	54	72
Plains	ACItf	91	R0-2	Evening	55	72	36	68	18	36	54	72
Plains	ACItf	91	R0-24	Dawn	55	72	36	68	18	36	54	72
Plains	ACItf	91	R0-24	Evening	55	72	36	68	18	36	54	72
Plains	ACItf	91	R12-24	Dawn	55	72	36	68	18	36	54	72
Plains	ACItf	91	R12-24	Evening	55	72	36	68	18	36	54	72
Plains	ACItf	91	R2-12	Dawn	55	72	36	68	18	36	54	72
Plains	ACItf	91	R2-12	Evening	55	72	36	68	18	36	54	72
Plains	ACItf	96	R0-2	Full	55	73	36	69	19	38	57	76
Plains	ACItf	96	R0-24	Full	55	73	36	69	19	38	57	76
Plains	ACItf	96	R12-24	Full	55	73	36	69	19	38	57	76
Plains	ACItf	96	R2-12	Full	55	73	36	69	19	38	57	76
Plains	BI	91	R0-2	Dawn	55	72	36	68	18	36	54	72
Plains	BI	91	R0-2	Evening	55	72	36	68	18	36	54	72
Plains	BI	96	R0-2	Full	55	73	36	69	19	38	57	76
Plains	NDSI	91	R0-2	Dawn	55	72	36	68	18	36	54	72
Plains	NDSI	91	R0-2	Evening	55	72	36	68	18	36	54	72
Plains	NDSI	96	R0-2	Full	55	73	36	69	19	38	57	76
Plains	NP	91	R0-2	Dawn	55	72	36	68	18	36	54	72
Plains	NP	91	R0-2	Evening	55	72	36	68	18	36	54	72
Plains	NP	91	R0-24	Dawn	55	72	36	68	18	36	54	72
Plains	NP	91	R0-24	Evening	55	72	36	68	18	36	54	72
Plains	NP	91	R12-24	Dawn	55	72	36	68	18	36	54	72
Plains	NP	91	R12-24	Evening	55	72	36	68	18	36	54	72
Plains	NP	91	R2-12	Dawn	55	72	36	68	18	36	54	72
Plains	NP	91	R2-12	Evening	55	72	36	68	18	36	54	72
Plains	NP	96	R0-2	Full	55	73	36	69	19	38	57	76
Plains	NP	96	R0-24	Full	55	73	36	69	19	38	57	76
Plains	NP	96	R12-24	Full	55	73	36	69	19	38	57	76
Plains	NP	96	R2-12	Full	55	73	36	69	19	38	57	76
AndeanRural	ACIft	38	R24-96	Dawn	27	28	21	27	7	15	22	30
AndeanRural	ACIft	39	R24-96	Evening	26	28	22	29	7	15	23	31
AndeanRural	ACIft	41	R24-96	Full	27	29	23	29	8	16	24	32
AndeanRural	ACItf	38	R24-96	Dawn	27	28	21	27	7	15	22	30
AndeanRural	ACItf	39	R24-96	Evening	26	28	22	29	7	15	23	31
AndeanRural	ACItf	41	R24-96	Full	27	29	23	29	8	16	24	32
AndeanRural	BI	38	R24-96	Dawn	27	28	21	27	7	15	22	30
AndeanRural	BI	39	R24-96	Evening	26	28	22	29	7	15	23	31
AndeanRural	BI	41	R24-96	Full	27	29	23	29	8	16	24	32
AndeanRural	NP	38	R24-96	Dawn	27	28	21	27	7	15	22	30
AndeanRural	NP	39	R24-96	Evening	26	28	22	29	7	15	23	31
AndeanRural	NP	41	R24-96	Full	27	29	23	29	8	16	24	32
AndeanUrban	ACIft	54	R24-96	Dawn	50	53	23	50	10	21	32	43
AndeanUrban	ACIft	54	R24-96	Evening	50	53	23	50	10	21	32	43
AndeanUrban	ACIft	54	R24-96	Full	50	53	23	50	10	21	32	43
AndeanUrban	ACItf	54	R24-96	Dawn	50	53	23	50	10	21	32	43
AndeanUrban	ACItf	54	R24-96	Evening	50	53	23	50	10	21	32	43
AndeanUrban	ACItf	54	R24-96	Full	50	53	23	50	10	21	32	43
AndeanUrban	BI	54	R24-96	Dawn	50	53	23	50	10	21	32	43
AndeanUrban	BI	54	R24-96	Evening	50	53	23	50	10	21	32	43
AndeanUrban	BI	54	R24-96	Full	50	53	23	50	10	21	32	43
AndeanUrban	NP	54	R24-96	Dawn	50	53	23	50	10	21	32	43
AndeanUrban	NP	54	R24-96	Evening	50	53	23	50	10	21	32	43
AndeanUrban	NP	54	R24-96	Full	50	53	23	50	10	21	32	43
Plains	ACIft	91	R24-96	Dawn	55	72	36	68	18	36	54	72
Plains	ACIft	91	R24-96	Evening	55	72	36	68	18	36	54	72
Plains	ACIft	96	R24-96	Full	55	73	36	69	19	38	57	76
Plains	ACItf	91	R24-96	Dawn	55	72	36	68	18	36	54	72
Plains	ACItf	91	R24-96	Evening	55	72	36	68	18	36	54	72
Plains	ACItf	96	R24-96	Full	55	73	36	69	19	38	57	76
Plains	BI	91	R24-96	Dawn	55	72	36	68	18	36	54	72
Plains	BI	91	R24-96	Evening	55	72	36	68	18	36	54	72
Plains	BI	96	R24-96	Full	55	73	36	69	19	38	57	76
Plains	NP	91	R24-96	Dawn	55	72	36	68	18	36	54	72
Plains	NP	91	R24-96	Evening	55	72	36	68	18	36	54	72
Plains	NP	96	R24-96	Full	55	73	36	69	19	38	57	76

## Sheet: METADATA
VARIABLE	DESCRIPTION
Locality	Study area where the acoustic recorders were deployed (e.g., AndeanRural, AndeanUrban, ColombianPlains).
Index	Acoustic index used to generate the interpolated surface (e.g., ACItf, ACIft, BI, NDSI).
Num_Points_Total	Total number of recorder locations available for the given locality after quality control and file filtering.
Frequency_Range	Frequency band used to compute the acoustic index (e.g., R0–2, R0–24, R2–12, R12–24 kHz).
Time_Period	Daily time window over which the index values were summarized (Dawn, Evening, FullDay).
basins	Number of recorder locations selected under the Basin tessellation strategy.
halfbasins	Number of recorder locations selected under the Halfbasin tessellation strategy.
Landcover	Number of recorder locations selected under the landcover-based stratified sampling strategy.
SLIC	Number of recorder locations selected under the SLIC superpixel tessellation strategy.
ssample20	Number of recorder locations retained under random sub-sampling at 20% of the full grid.
ssample40	Number of recorder locations retained under random sub-sampling at 40% of the full grid.
ssample60	Number of recorder locations retained under random sub-sampling at 60% of the full grid.
ssample80	Number of recorder locations retained under random sub-sampling at 80% of the full grid.
