# Supplementary material for: A workflow to optimize spatial sampling in ecoacoustic studies
Source: Research Square preprint supplement (doi:10.21203/rs.3.rs-7207339/v2), 2026-01-13
Supplement: Supplementary file 37 [file Sampling_efficiency_summary_mean_SD.xlsx]

## Sheet: Data
Locality	Strategy	Mean Percent of original sample	SD
AndeanRural	basins	67.8278	2.2837
AndeanRural	halfbasins	72.0703	1.22668
AndeanRural	Landcover	55.9042	0.492303
AndeanRural	SLIC	72.0478	1.64715
AndeanRural	ssample20	18.626	0.653354
AndeanRural	ssample40	38.9869	0.414439
AndeanRural	ssample60	58.4669	0.443816
AndeanRural	ssample80	78.8277	0.593324
AndeanUrban	basins	92.5926	5.56304e-06
AndeanUrban	halfbasins	98.1481	5.90049e-06
AndeanUrban	Landcover	42.5926	2.47802e-06
AndeanUrban	SLIC	92.5926	5.56304e-06
AndeanUrban	ssample20	18.5185	0
AndeanUrban	ssample40	38.8889	1.21043e-05
AndeanUrban	ssample60	59.2593	0
AndeanUrban	ssample80	79.6296	1.60022e-05
Plains	basins	59.4002	1.48743
Plains	halfbasins	78.1137	1.45143
Plains	Landcover	38.8736	0.975959
Plains	SLIC	73.7841	1.3468
Plains	ssample20	19.784	0.00539921
Plains	ssample40	39.5681	0.0108044
Plains	ssample60	59.3521	0.016186
Plains	ssample80	79.1361	0.0215681
